# Supplementary material for: Iron oligopyridine complexes as efficient catalysts for practical oxidation of arenes, alkanes, tertiary amines and N-acyl cyclic amines with Oxone
Source: Royal Society of Chemistry journal article supplement (doi:10.1039/c1sc00234a), 2011-01-01

## Electronic Supplementary Information (ESI)

# **Iron oligopyridine complexes as efficient catalysts for practical oxidation of arenes, alkanes, tertiary amines and *N*-acyl cyclic amines with Oxone**

Peng Liu, Yungen Liu, Ella Lai-Ming Wong, Song Xiang and Chi-Ming Che\*

Department of Chemistry, State Key Laboratory on Synthetic Chemistry, and Open Laboratory of Chemical Biology of the Institute of Molecular Technology for Drug Discovery and Synthesis, The University of Hong Kong, Pokfulam Road, Hong Kong;

E-mail: [cmche@hku.hk](mailto:cmche@hku.hk)

## Syntheses and characterizations of 2 and 3.

### [Fe(spy)]<sub>2</sub>(ClO<sub>4</sub>)<sub>4</sub> (2)

In a 50 mL round bottom flask, spy (4.64 g, 10 mmol) and Fe(ClO<sub>4</sub>)<sub>2</sub>·6H<sub>2</sub>O (3.63 g, 10 mmol, 1 equiv.) were dissolved in 30 mL of acetonitrile and the solution was turned to purple immediately. After stirring at room temperature under argon atmosphere for additional 4 h, the solution was filtered by filter paper. Diethyl ether was slowly added to the filtrate and the complex was precipitated from the solution. The product was collected by filtration, washed with diethyl ether and dried under reduced pressure (92% yield). UV/Vis (CH<sub>3</sub>CN): λ<sub>max</sub>/nm (ε<sub>max</sub>/dm<sup>3</sup> mol<sup>-1</sup> cm<sup>-1</sup>): 552 (10809), 320 (66413). ESI-MS: *m/z* 260.0 ([Fe<sub>2</sub>(spy)<sub>2</sub>]<sup>4+</sup>). C<sub>60</sub>H<sub>40</sub>Cl<sub>4</sub>Fe<sub>2</sub>N<sub>12</sub>O<sub>16</sub> (%) caclcd. C: 50.10; H: 2.80; N: 11.68; Found C: 49.48; H: 3.03; N: 11.22.

### [Fe(septipy)]<sub>2</sub>(ClO<sub>4</sub>)<sub>4</sub> (3)

In a 50 mL round bottom flask, septipy (1.08 g, 2 mmol) and Fe(ClO<sub>4</sub>)<sub>2</sub>·6H<sub>2</sub>O (726 mg, 2 mmol, 1 equiv.) were dissolved in 5 mL of acetonitrile and the solution was turned to purple immediately. After stirring at room temperature under argon atmosphere for additional 4 h, the solution was filtered by filter paper. Diethyl ether was slowly added to the filtrate and the complex was precipitated from the solution. The product was collected by filtration, washed with diethyl ether and dried under reduced pressure (98% yield). UV/Vis (CH<sub>3</sub>CN): λ<sub>max</sub>/nm (ε<sub>max</sub>/dm<sup>3</sup> mol<sup>-1</sup> cm<sup>-1</sup>): 532 (6219), 306 (31998). ESI-MS: *m/z* 298.5 ([Fe(septipy)]<sup>2+</sup>). C<sub>70</sub>H<sub>46</sub>Cl<sub>4</sub>Fe<sub>2</sub>N<sub>14</sub>O<sub>16</sub>·H<sub>2</sub>O (%) caclcd. C: 52.20; H: 3.00; N: 12.17; Found C: 51.74; H: 2.91; N: 12.03.

## Attempts to isolate $[\text{Fe}(\text{qpy})\text{O}]^{2+}$ and/or $[\text{Fe}(\text{qpy})\text{O}_2]^{2+}$

Upon diffusion of diethyl ether to an  $\text{CH}_3\text{CN}$  solution of the reaction mixture [**1** + PhIO in molar ratio of 1: 1.2] at 0 °C, an orange crystalline solid was obtained and its structure was determined to be  $\{[\text{Fe}(\text{qpy})(\text{H}_2\text{O})]_2(\mu\text{-O})\}(\text{ClO}_4)_4$  (CCDC 818979) by X-ray crystallography. The Fe–O–Fe moiety is close to linearity with an angle of 168.7 (3)° (see Fig. S6 shown below). In contrast to  $\{[(\text{phen})_2\text{Fe}]_2(\text{H}_2\text{O})(\mu\text{-O})\}(\text{ClO}_4)_4$  which was reported to be an excellent epoxidation catalyst (see ref. 11 in text),  $\{[\text{Fe}(\text{qpy})(\text{H}_2\text{O})]_2(\mu\text{-O})\}(\text{ClO}_4)_4$  was found to be a poor catalyst for alkene epoxidation by Oxone or PhIO under the similar reaction conditions.

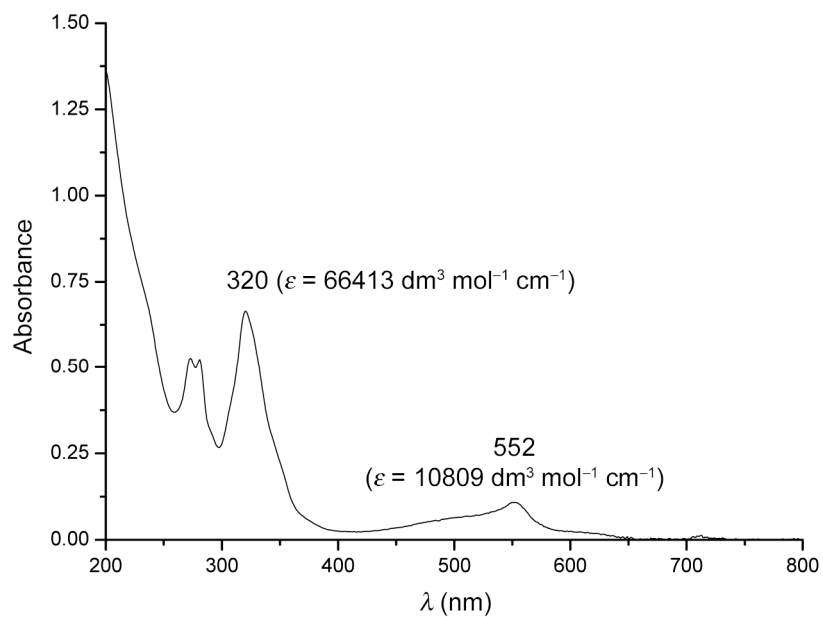

(a)

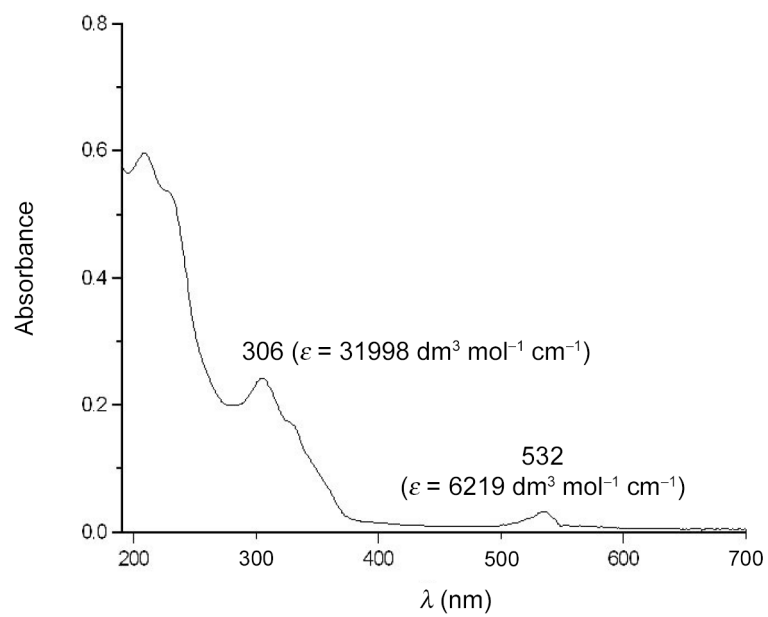

(b)

**Fig. S1** UV-visible absorption spectrum of **2** (a) and **3** (b) in  $\text{CH}_3\text{CN}$ .

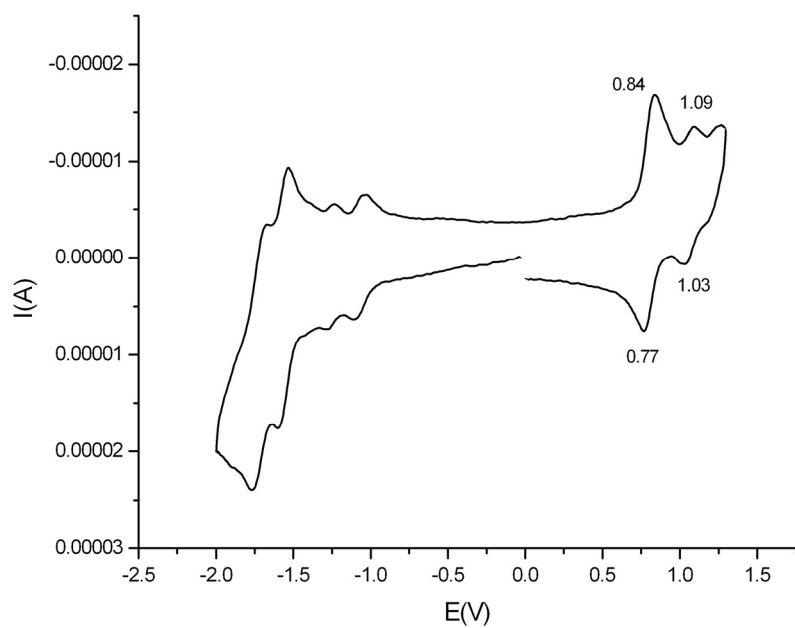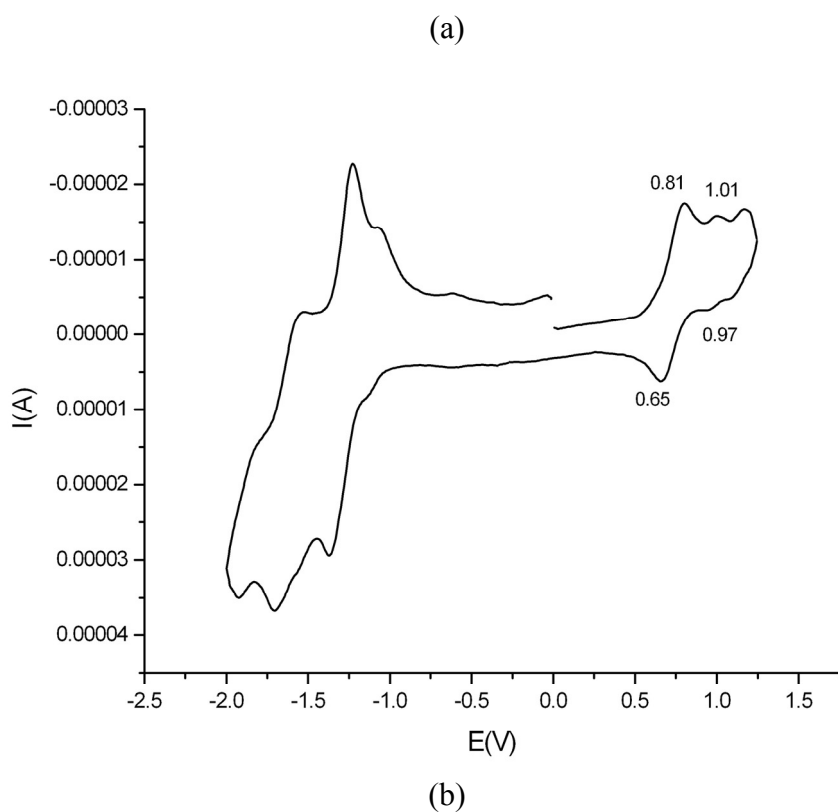

**Fig. S2** Cyclic voltammogram of **2** (a) and **3** (b) in 0.1 M  $n\text{Bu}_4\text{NPF}_6$   $\text{CH}_3\text{CN}$  solution.

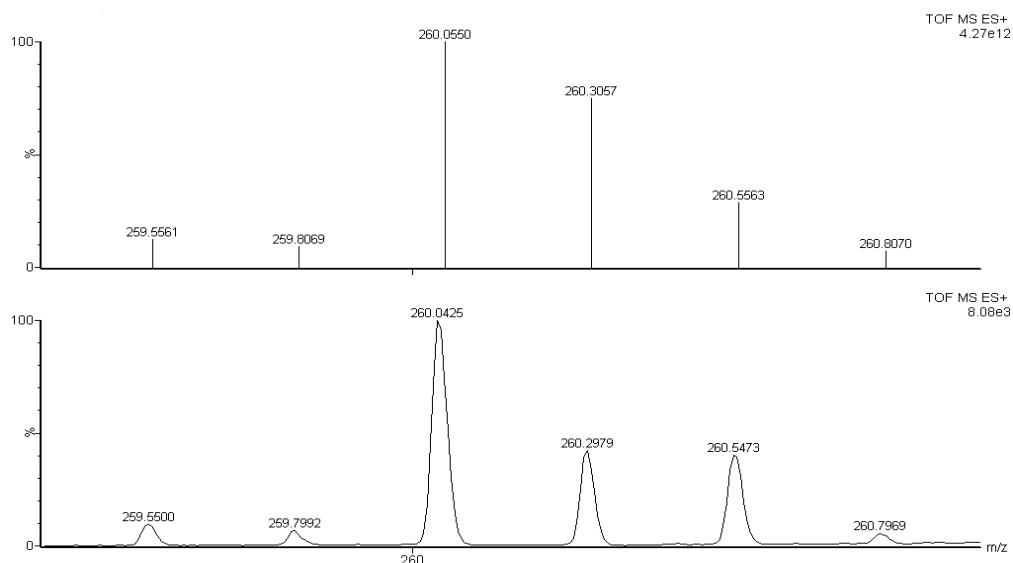

**Fig. S3** Electrospray ionization mass spectrum of  $[\text{Fe}_2(\text{spy})_2](\text{ClO}_4)_4$  (**2**) in  $\text{CH}_3\text{CN}$ ; simulated isotope pattern ( $[\text{C}_{60}\text{N}_{12}\text{H}_{36}\text{Fe}_2]^{4+}$ , top) and observed isotope pattern (bottom).

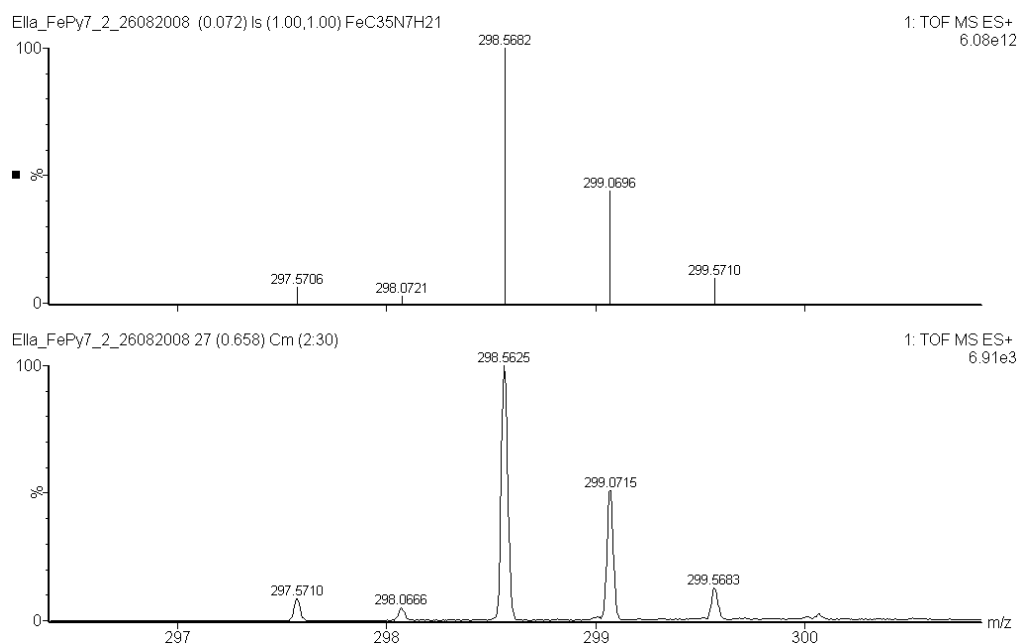

**Fig. S4** Electrospray ionization mass spectrum of  $[\text{Fe}_2(\text{septipy})_2](\text{ClO}_4)_4$  (**3**) in  $\text{CH}_3\text{CN}$ ; simulated isotope pattern ( $[\text{C}_{35}\text{N}_7\text{H}_{21}\text{Fe}]^{2+}$ , top) and observed isotope pattern (bottom).

**Table S1** Oxidation of styrene with different oxidants catalysed by **1**.<sup>a,b</sup>

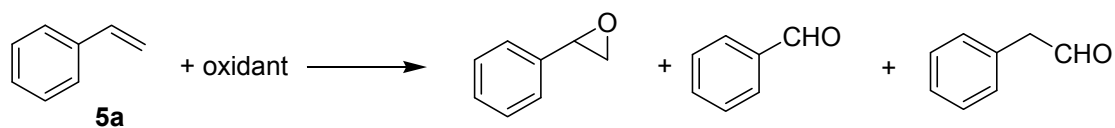

| entry | oxidant                                                             | conv. [%] <sup>[c]</sup> | yield [%] <sup>[c]</sup>                                                          |                                                                                    |                                                                                     |
|-------|---------------------------------------------------------------------|--------------------------|-----------------------------------------------------------------------------------|------------------------------------------------------------------------------------|-------------------------------------------------------------------------------------|
|       |                                                                     |                          | 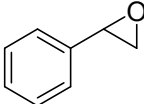 |  |  |
| 1     | H <sub>2</sub> O <sub>2</sub>                                       | 16                       | 28                                                                                | 11                                                                                 | 3                                                                                   |
| 2     | H <sub>2</sub> O <sub>2</sub> +<br>CH <sub>3</sub> COOH             | 14                       | 33                                                                                | 42                                                                                 | 6                                                                                   |
| 3     | H <sub>2</sub> O <sub>2</sub> +<br>NH <sub>4</sub> HCO <sub>3</sub> | 18                       | 46                                                                                | 11                                                                                 | 2                                                                                   |
| 4     | PhI(OAc) <sub>2</sub>                                               | 12                       | 81                                                                                | 6                                                                                  | 3                                                                                   |
| 5     | PhIO                                                                | 62                       | 91                                                                                | 2                                                                                  | 0                                                                                   |
| 6     | Oxone                                                               | 62                       | 16                                                                                | 31                                                                                 | 26                                                                                  |
| 7     | Oxone +<br>NH <sub>4</sub> HCO <sub>3</sub>                         | 92                       | 89                                                                                | 2                                                                                  | 0                                                                                   |

<sup>a</sup> The controlled experiment of using “Fe(ClO<sub>4</sub>)<sub>2</sub>•6H<sub>2</sub>O + Oxone” and “NH<sub>4</sub>HCO<sub>3</sub> + Oxone” gave poor yields of styrene oxide with low substrate conversion. <sup>c</sup> Substrate/catalyst/oxidant molar ratio = 1/0.05/1.3, room temperature, 2 h. <sup>e</sup> Determined by GC analysis.

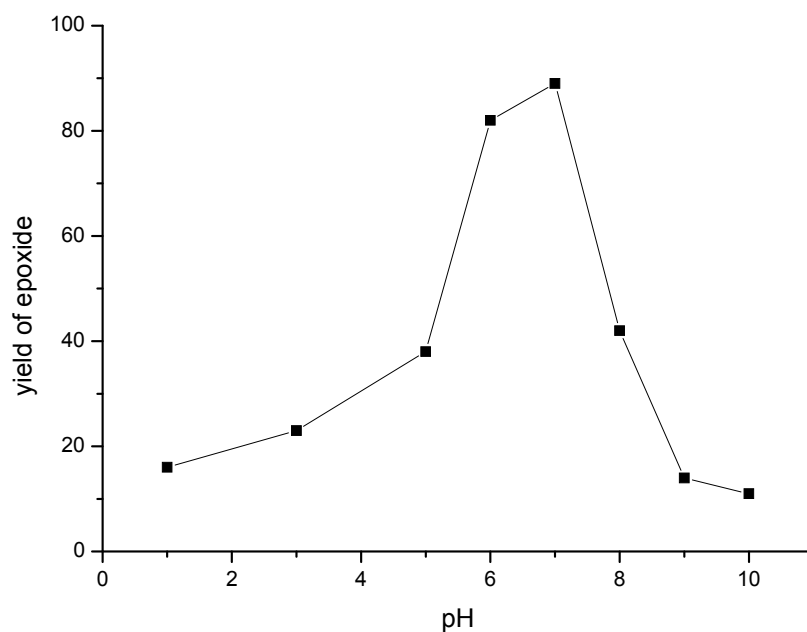

**Fig. S5** Epoxidation of styrene (**5a**) using Oxone as terminal oxidant with **1** as catalyst at various pH.

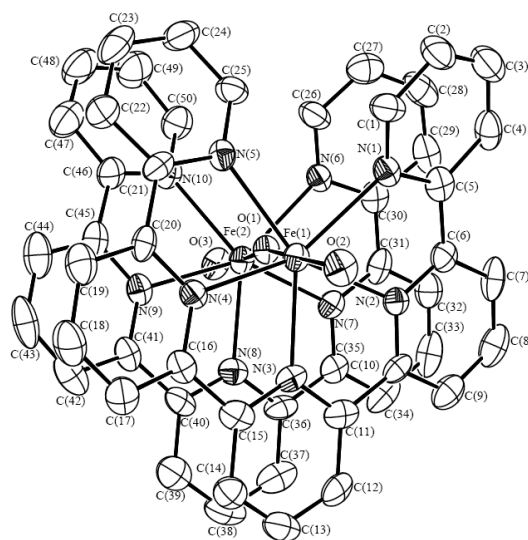

**Fig. S6** Perspective view of the complex cation of  $\{[\text{Fe}(\text{qpy})(\text{H}_2\text{O})_2(\mu\text{-O})]\}(\text{ClO}_4)_4$  (hydrogen atoms are not shown).



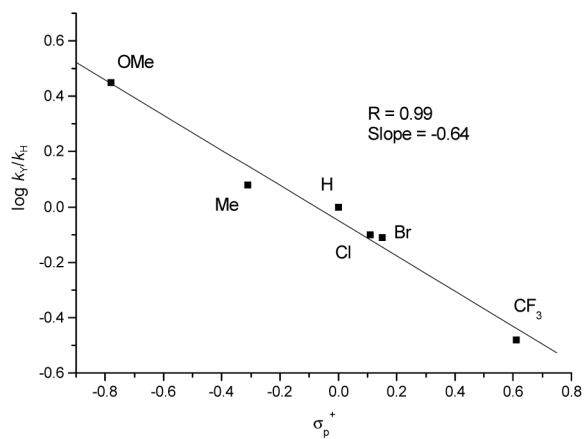

(a)

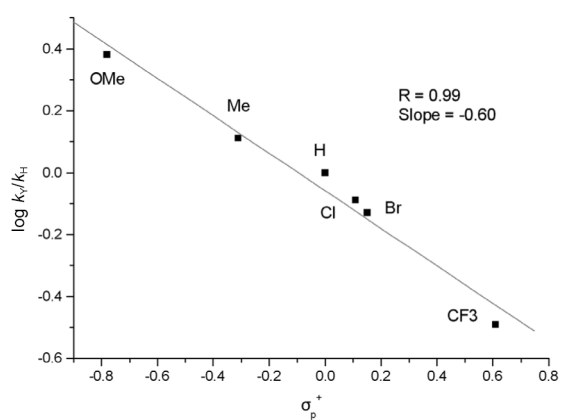

(b)

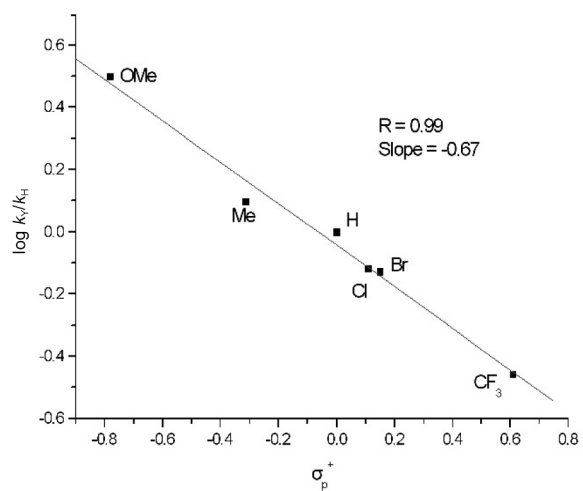

(c)

**Fig. S7** Plots of  $\log k_Y/k_H$  vs  $\sigma_p^+$  for the epoxidation of *para*-substituted styrenes catalysed by **1** (a), **2** (b) and **3** (c).

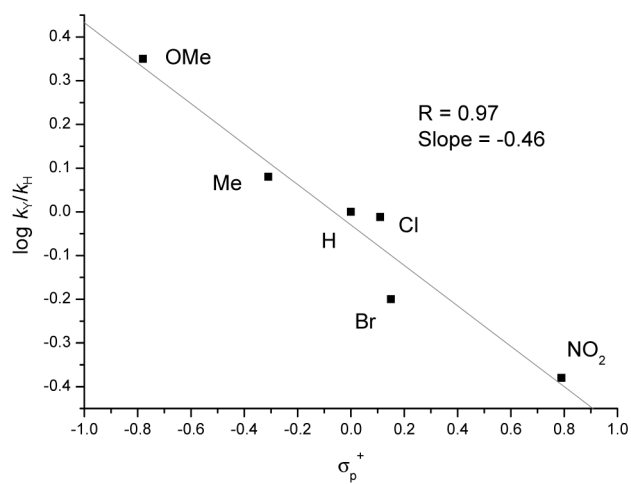

(a)

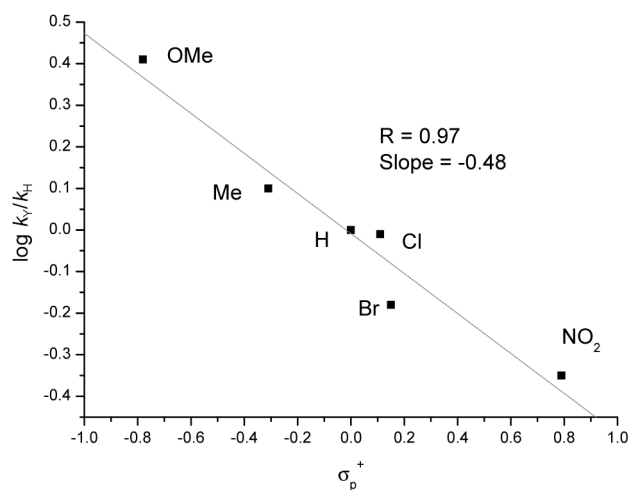

(b)

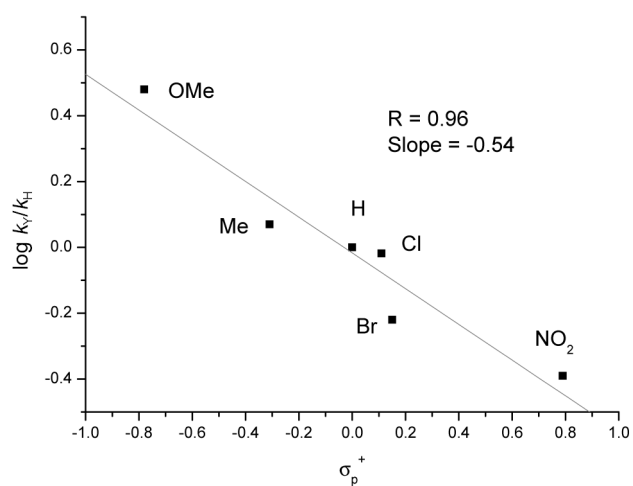

(c)

**Figure S8** Plots of  $\log k_Y/k_H$  vs  $\sigma_p^+$  for oxidation of ethyl benzenes catalysed by **1** (a), **2** (b) and **3** (c).

## Reported compounds in literature

| Compounds                                                                                                                                                                 | References                                                                     |
|---------------------------------------------------------------------------------------------------------------------------------------------------------------------------|--------------------------------------------------------------------------------|
| <b>6a-g, 6m, 8a-g</b> , the products of <b>9a-i, 11a-f, 13a-e, 13g, 13h, 15d-g</b> ,<br>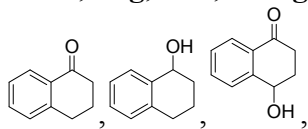 | Commercially available.                                                        |
| <b>6ha, 6hb, 6i, 6j, 6n, 6o</b> ,<br>                                                    | P. Liu, et al, <i>Org. Lett.</i> , 2008, <b>10</b> , 3275.                     |
| <b>6k</b> ,<br>                                                                          | P. Bovicelli, et al, <i>J. Org. Chem.</i> , 1992, <b>57</b> , 2182.            |
| <b>6l</b> ,<br>                                                                         | R. Kluge, <i>Tetrahedron</i> , 1996, <b>52</b> , 2957.                         |
| <b>9ja</b> ,<br>                                                                       | G. Reginato, et al, <i>J. Org. Chem.</i> , 1990, <b>55</b> , 5132.             |
| <b>9la</b> ,<br>                                                                       | C. Cianetti, et al, <i>Tetrahedron</i> , 1983, <b>39</b> , 657.                |
| <b>9ma</b> ,<br>                                                                       | C. Cianetti, et al, <i>Tetrahedron</i> , 1983, <b>39</b> , 657.                |
| <b>9na</b> ,<br>                                                                       | J. Christoffers, <i>J. Org. Chem.</i> , 1999, <b>64</b> , 7668.                |
| <b>9nk</b> ,<br>                                                                       | J. N. Payette, et al, <i>J. Am. Chem. Soc.</i> , 2008, <b>130</b> , 12276.     |
| <b>13f</b> ,<br>                                                                       | R. Ito, et al, <i>J. Am. Chem. Soc.</i> , 2005, <b>127</b> , 834.              |
| <b>15a</b> ,<br>                                                                       | S.-I. Murahashi, et al, <i>J. Am. Chem. Soc.</i> , 2003, <b>125</b> , 15312.   |
| <b>15b</b> ,<br>                                                                       | W. Han, et al, <i>Chem. Commun.</i> , 2009, 5024.                              |
| <b>15c</b> ,<br>                                                                       | S.-I. Murahashi, et al, <i>Angew. Chem., In. Ed.</i> , 2005, <b>44</b> , 6931. |

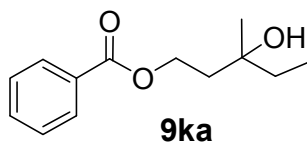

$^1\text{H}$  NMR (400 MHz,  $\text{CDCl}_3$ )  $\delta$  8.14 (d,  $J = 8.1$  Hz, 2H), 7.61 (m, 1H), 7.48 (m, 2H), 4.50 (t,  $J = 6.9$  Hz, 2H), 1.96 (m, 2H), 1.58 (q,  $J = 7.5$  Hz, 2H), 1.27 (s, 3H), 0.96 (t,  $J = 7.5$  Hz, 3H).  
 $^{13}\text{C}$  NMR (100 MHz,  $\text{CDCl}_3$ )  $\delta$  166.65, 132.95, 129.53, 128.41, 72.16, 61.80, 39.37, 35.02, 26.61, 8.26. MS (EI)  $m/z$  204 ( $[\text{M}-\text{H}_2\text{O}]^+$ ); HRMS (EI)  $m/z$  for  $\text{C}_{13}\text{H}_{16}\text{O}_2$  ( $[\text{M}-\text{H}_2\text{O}]^+$ ) calcd 204.1150, found 204.1143.

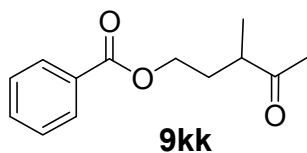

$^1\text{H}$  NMR (400 MHz,  $\text{CDCl}_3$ )  $\delta$  8.02 (d,  $J = 8.3$  Hz, 2H), 7.56 (m, 1H), 7.45 (m, 2H), 4.34 (t,  $J = 6.4$  Hz, 2H), 2.73 (m, 1H), 2.19 (m, 1H), 2.18 (s, 3H), 1.78 (m, 1H), 1.19 (d,  $J = 7.1$  Hz, 3H).  $^{13}\text{C}$  NMR (100 MHz,  $\text{CDCl}_3$ )  $\delta$  211.49, 166.53, 133.01, 129.56, 128.42, 62.93, 43.99, 31.49, 28.4, 16.57. MS (EI)  $m/z$  220 ( $\text{M}^+$ ); HRMS (EI)  $m/z$  for  $\text{C}_{13}\text{H}_{16}\text{O}_3$  ( $\text{M}^+$ ) calcd 220.1099, found 220.1094.

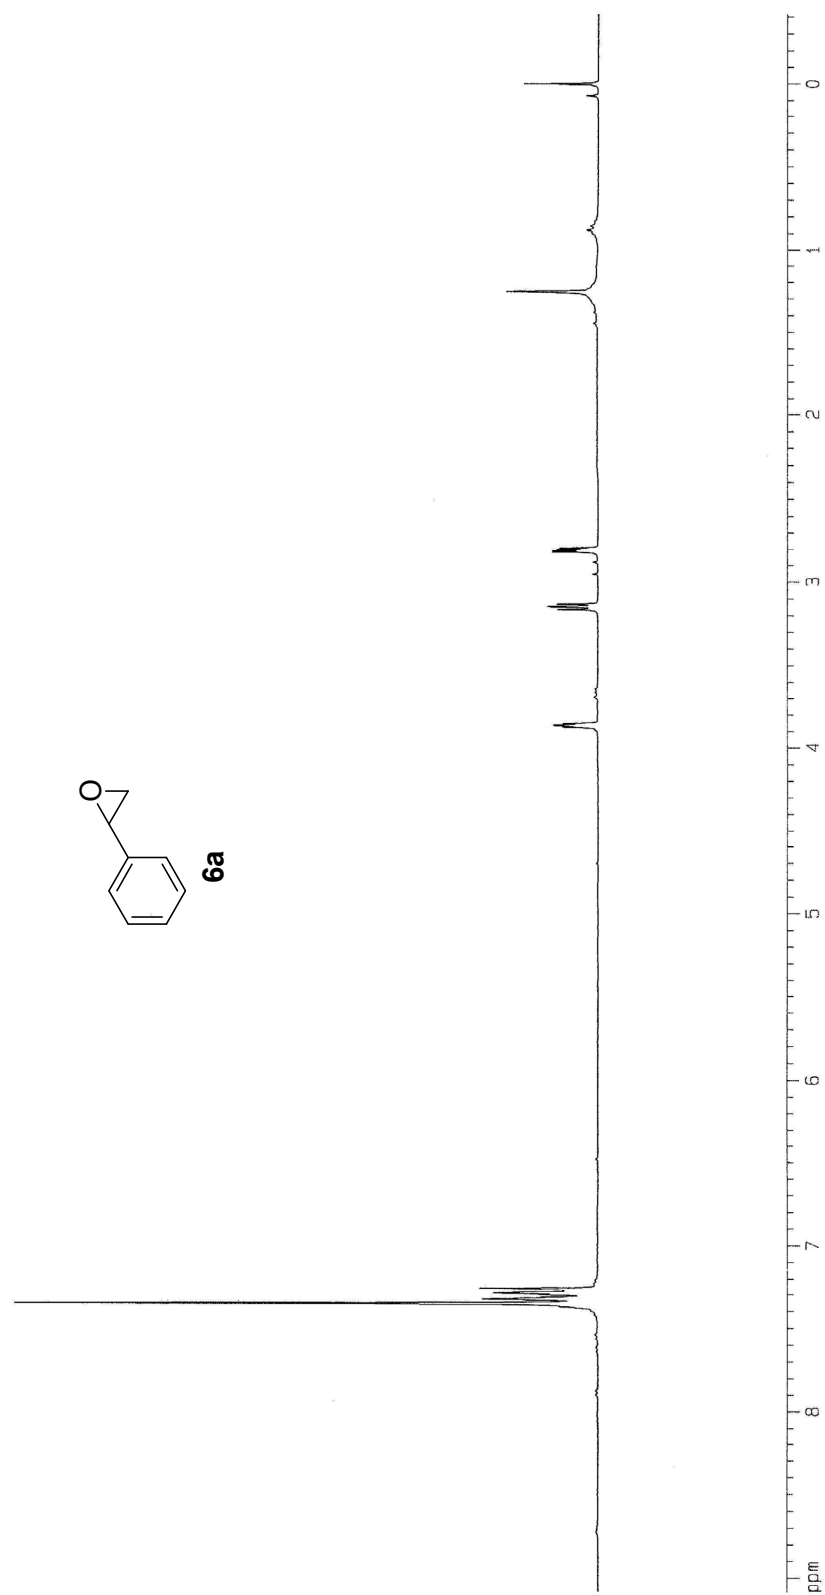

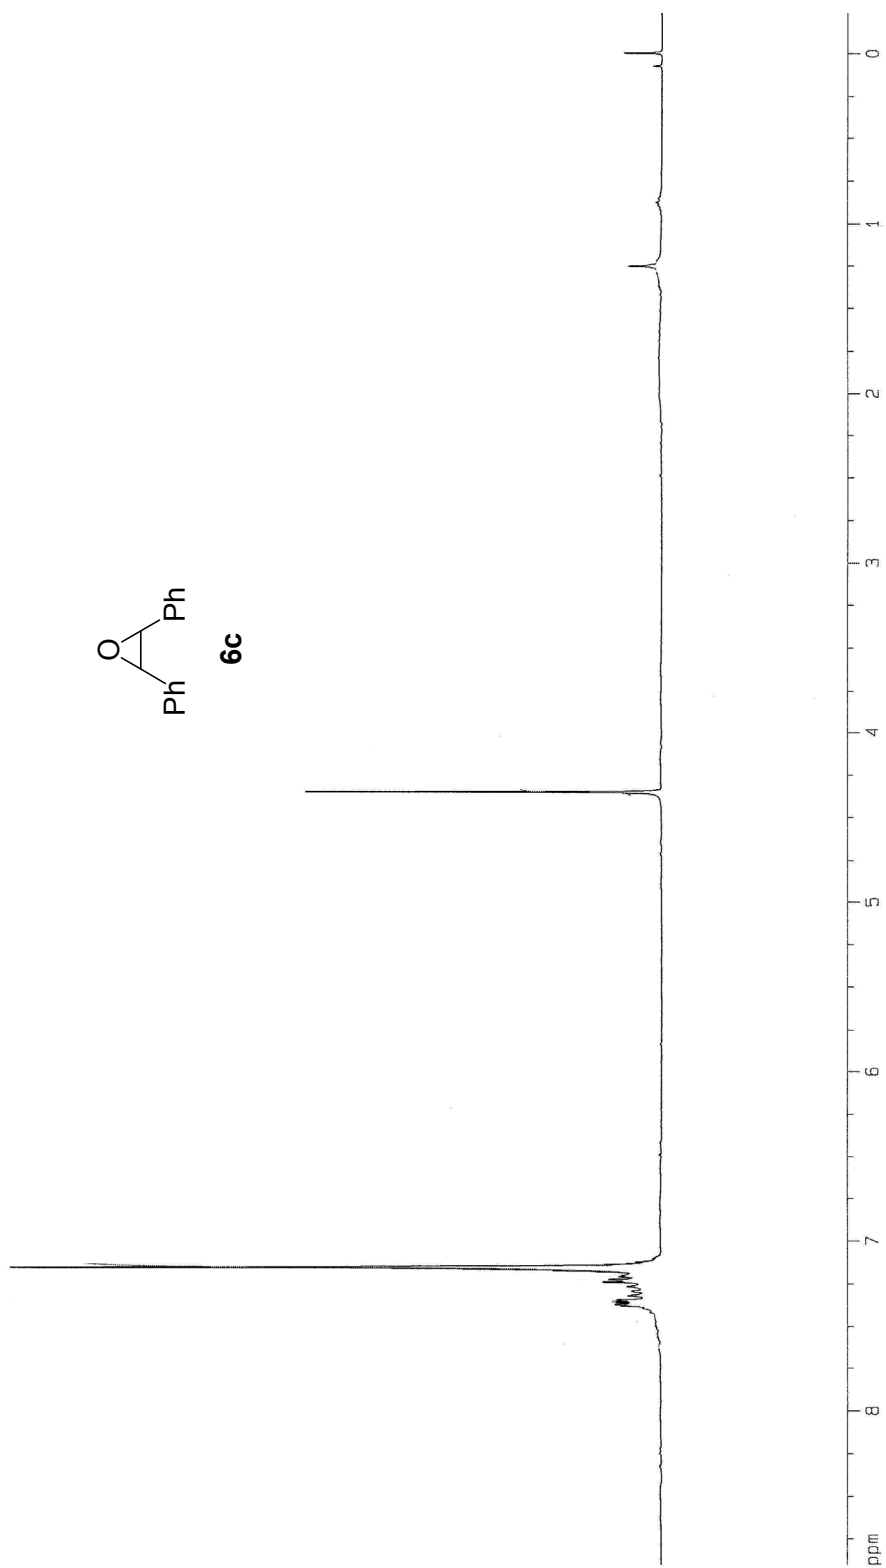

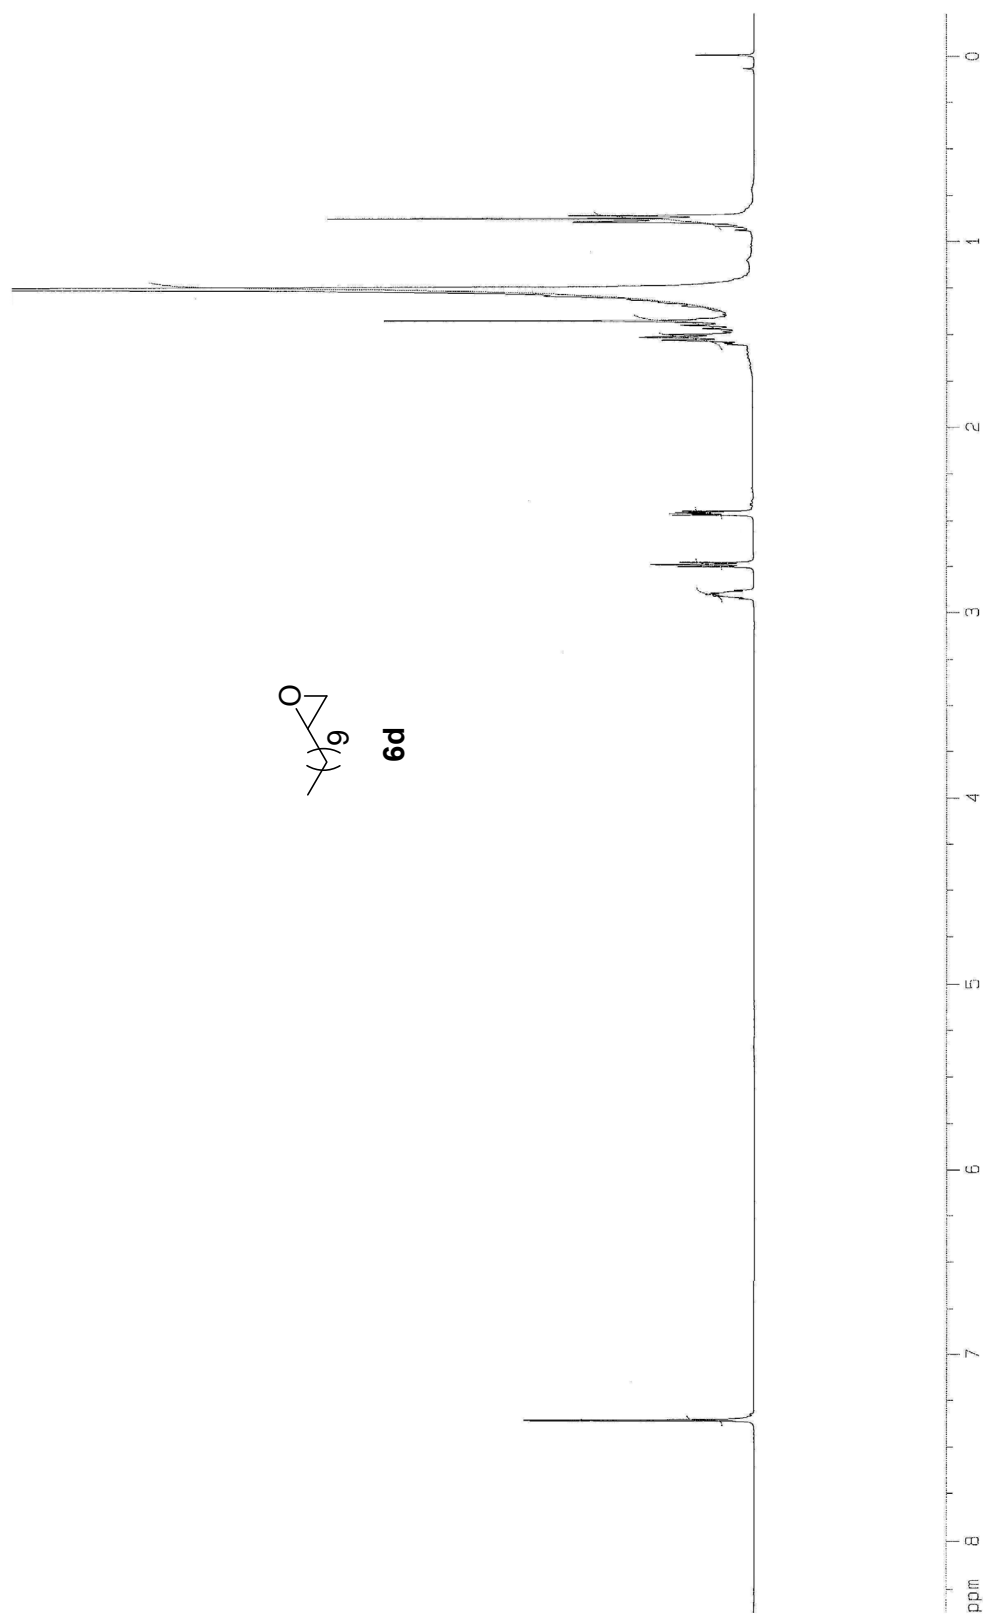

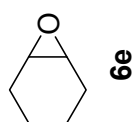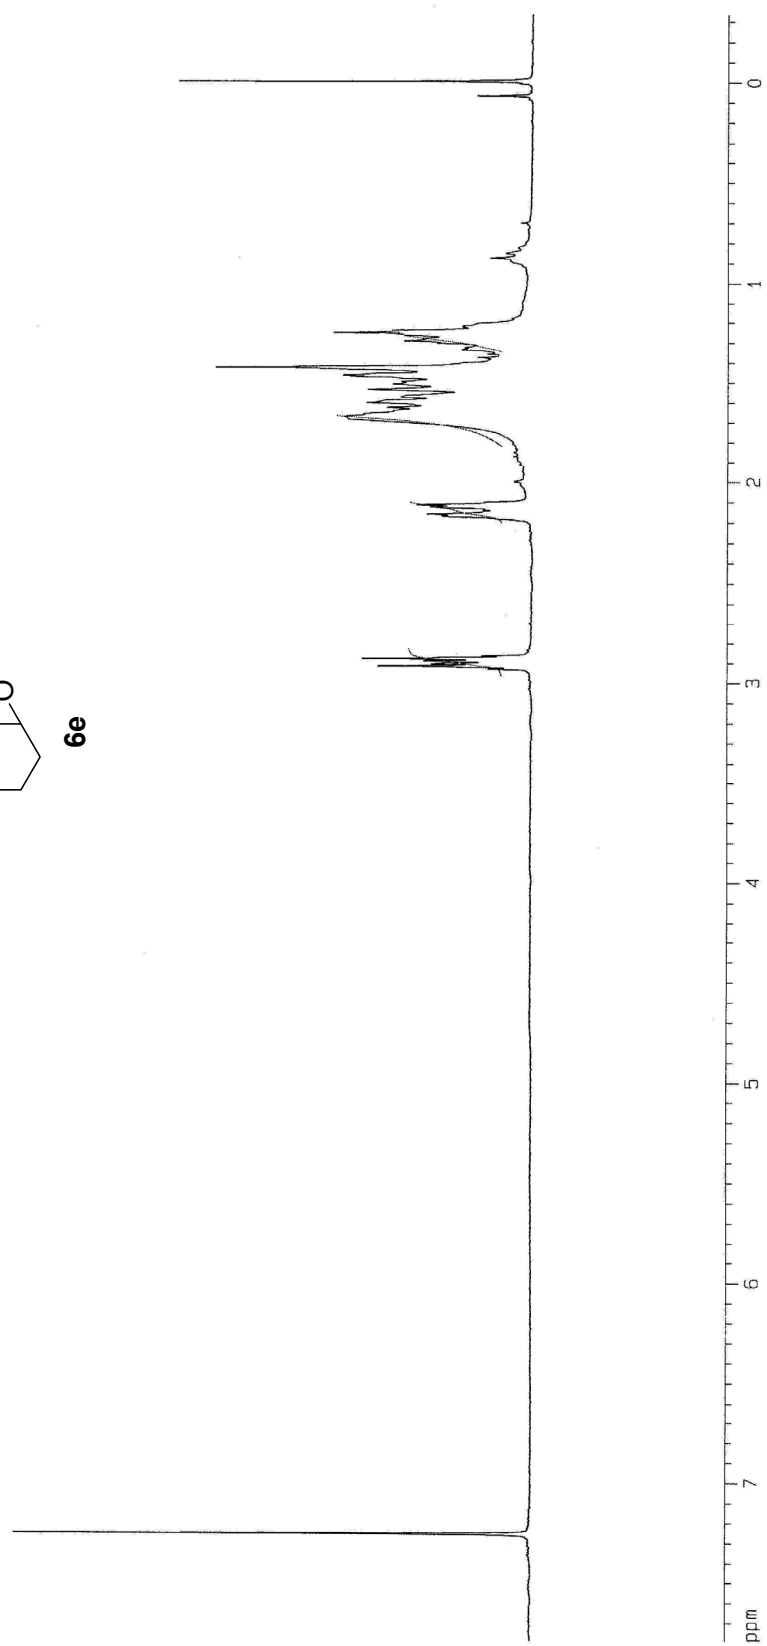



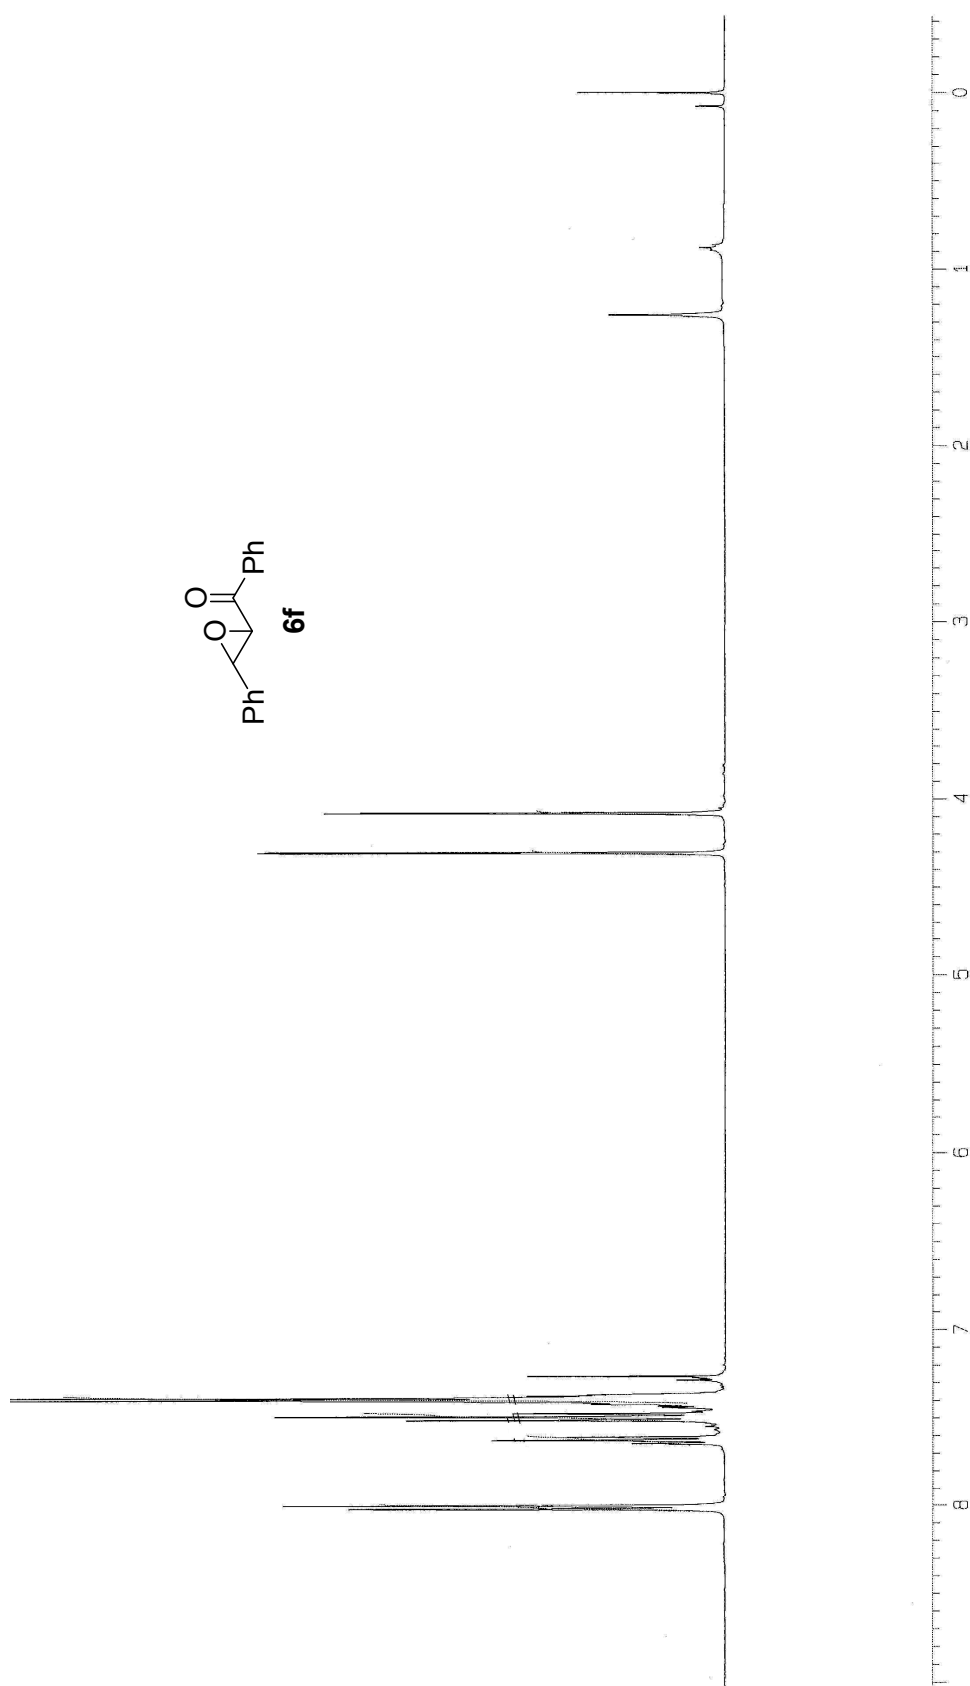

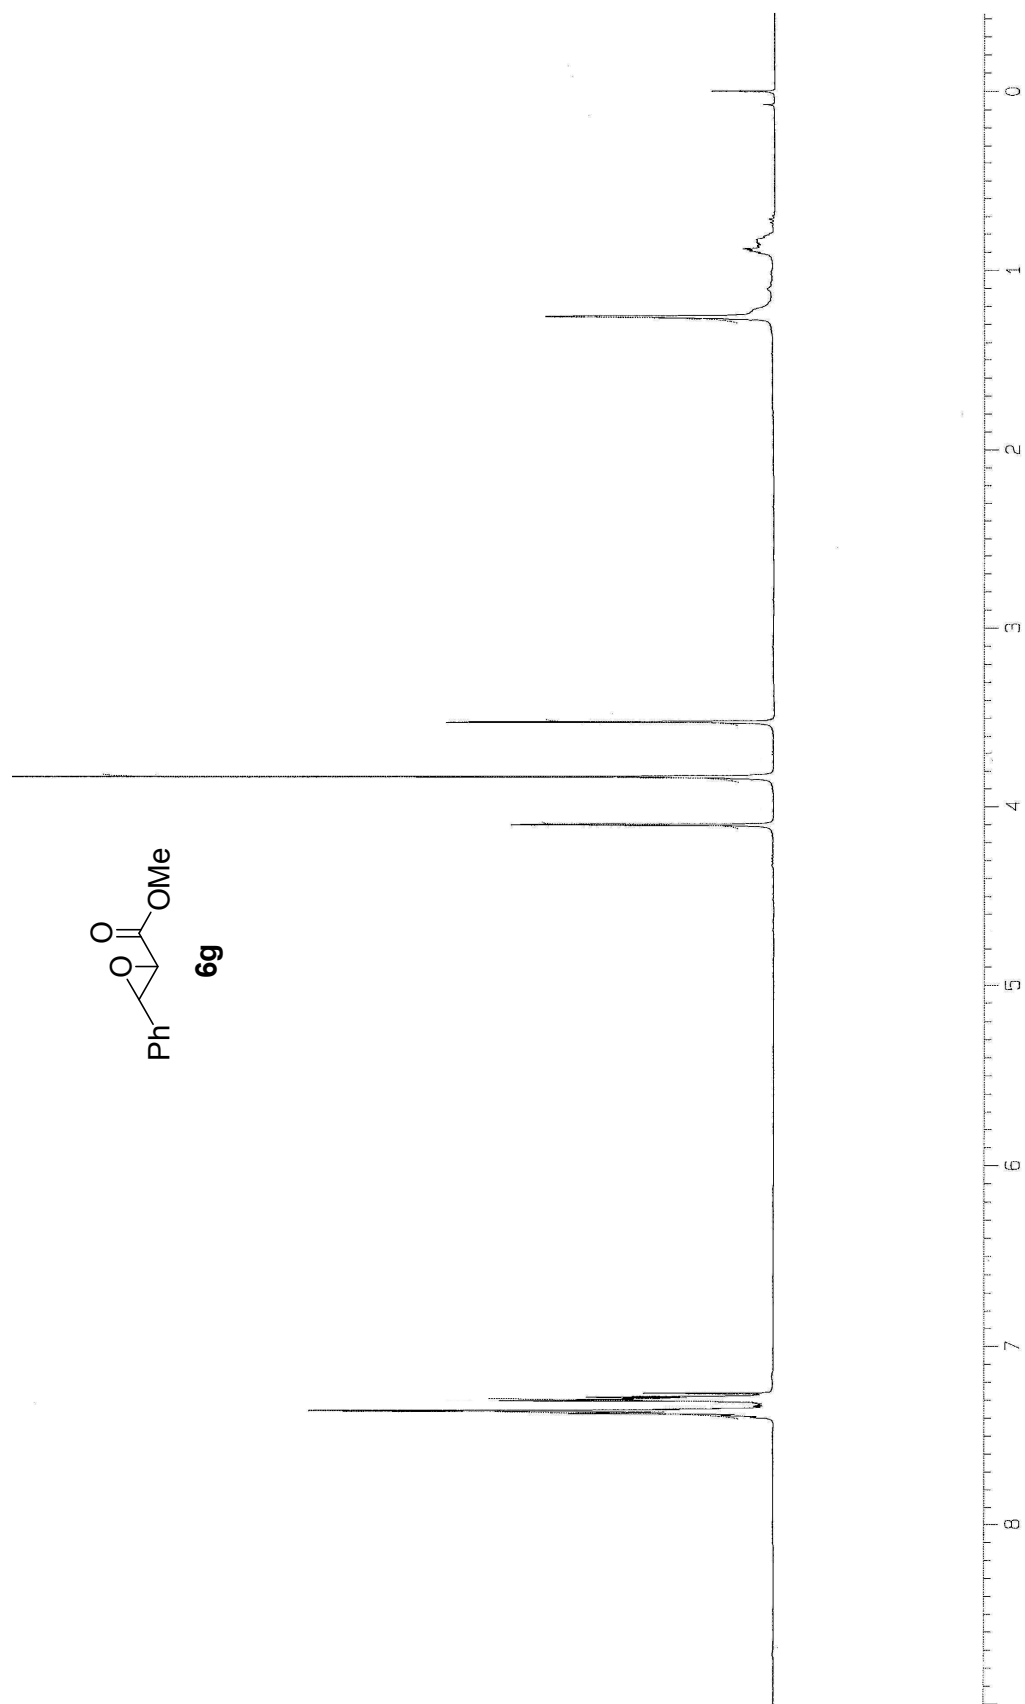

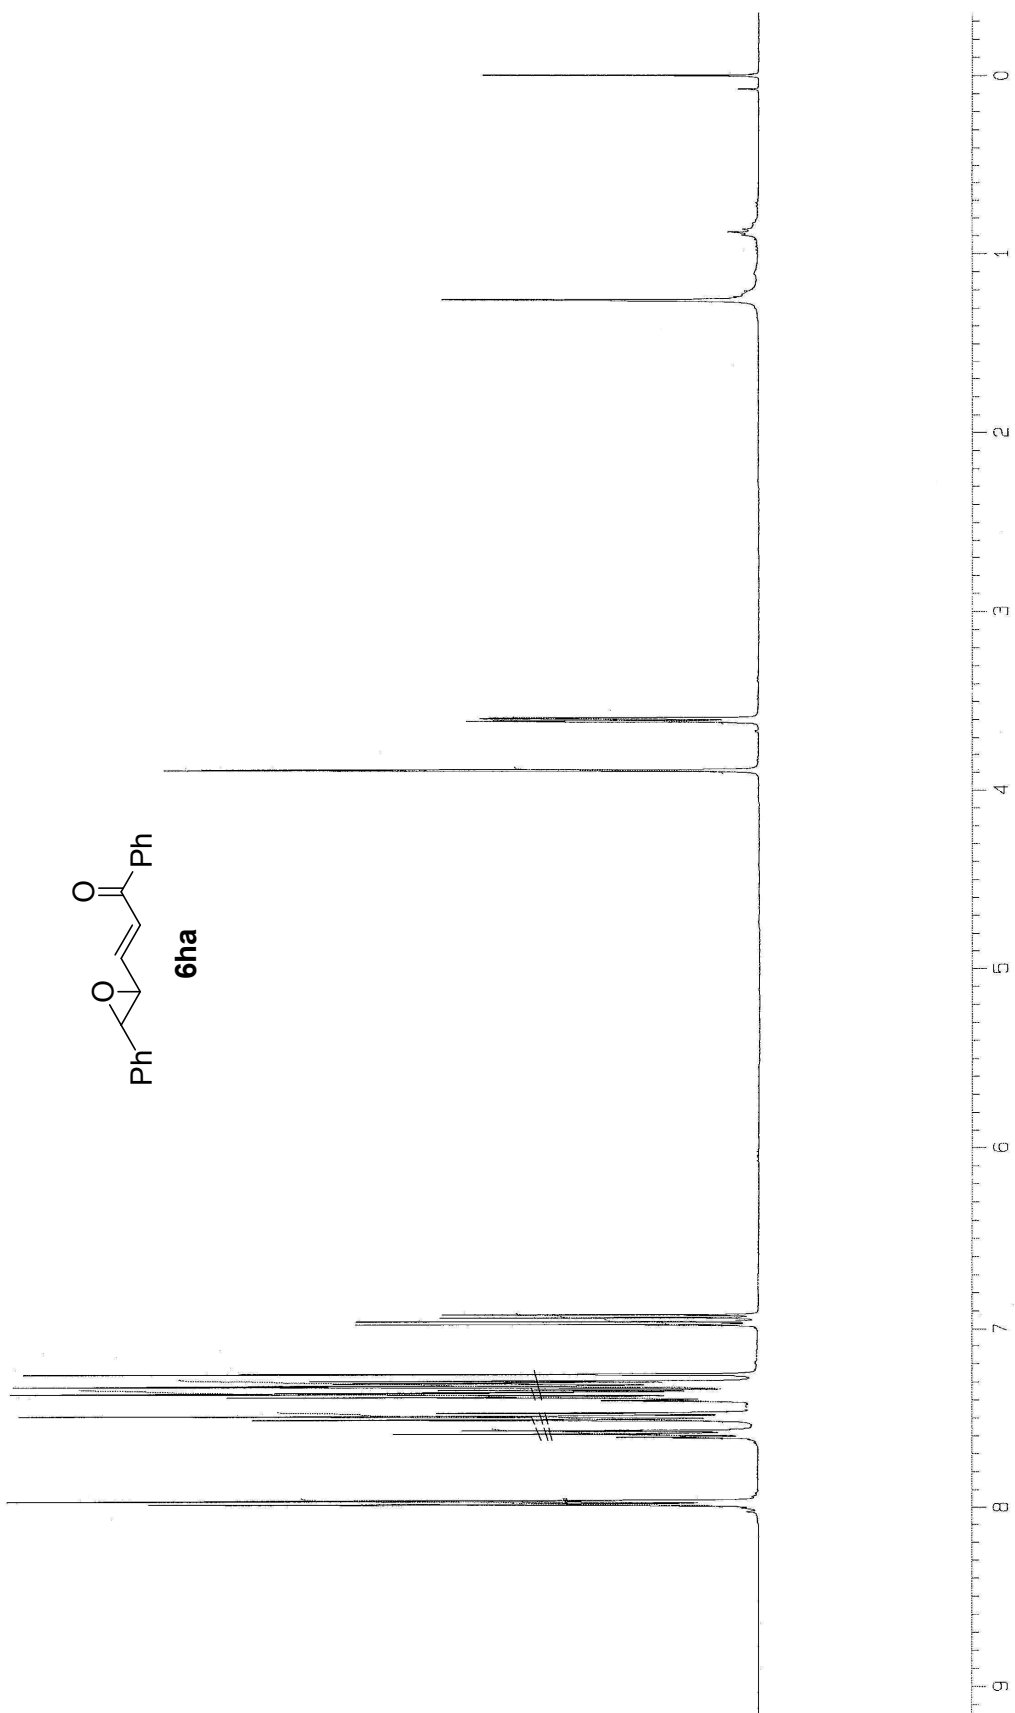

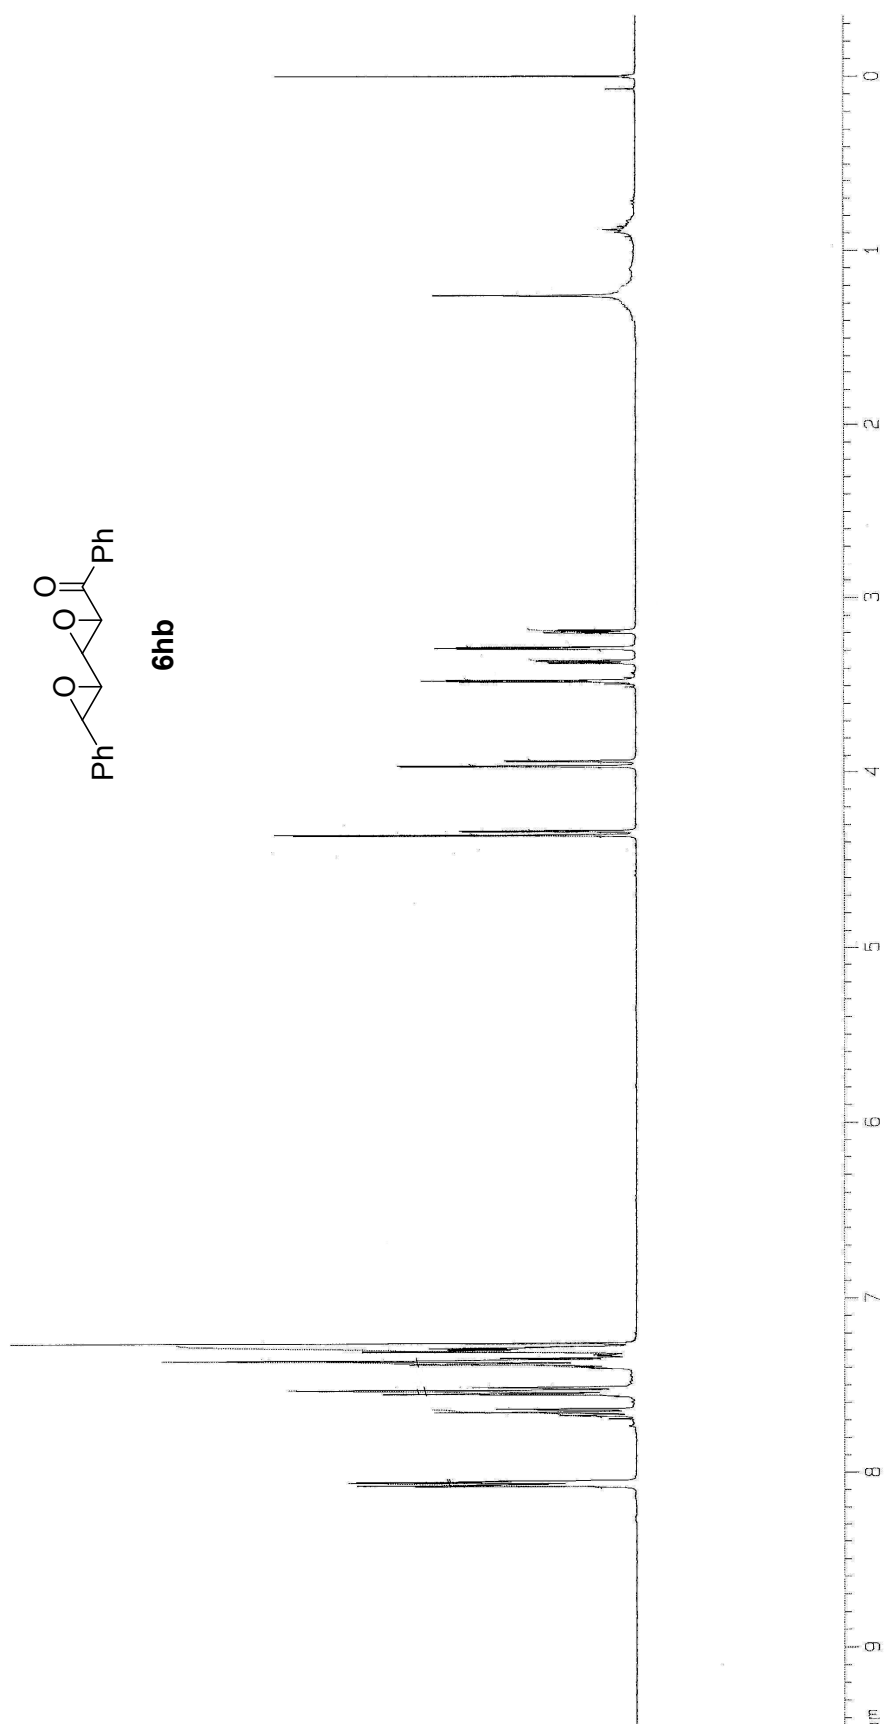

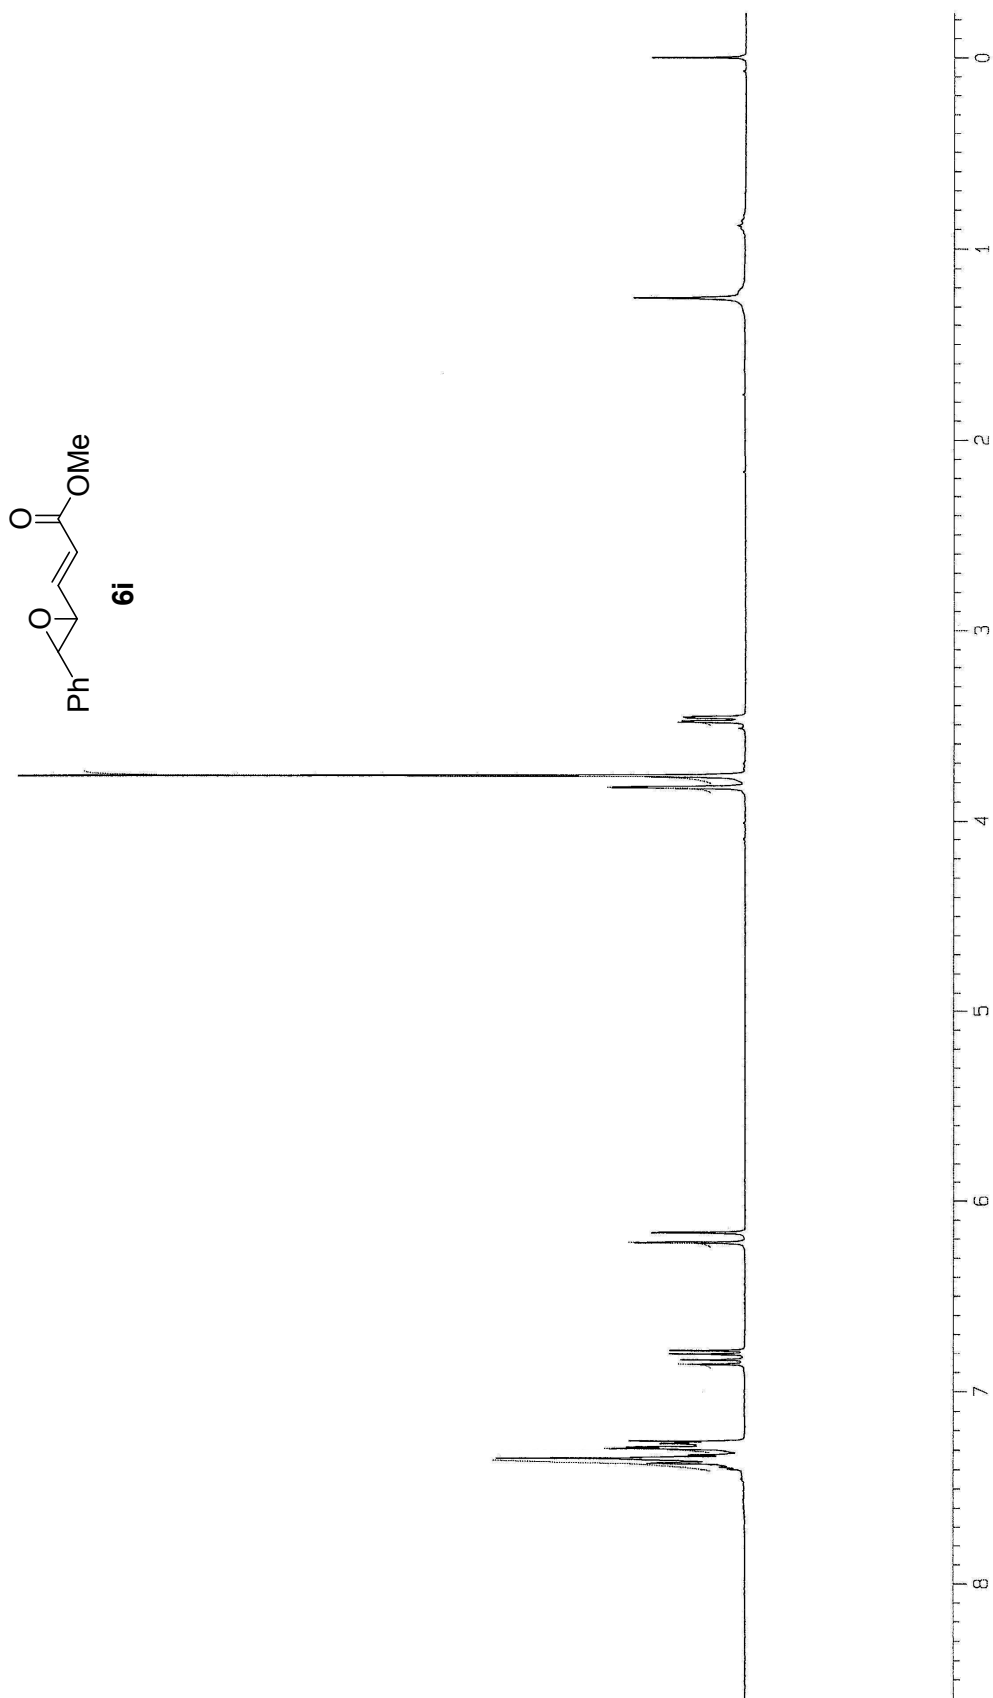

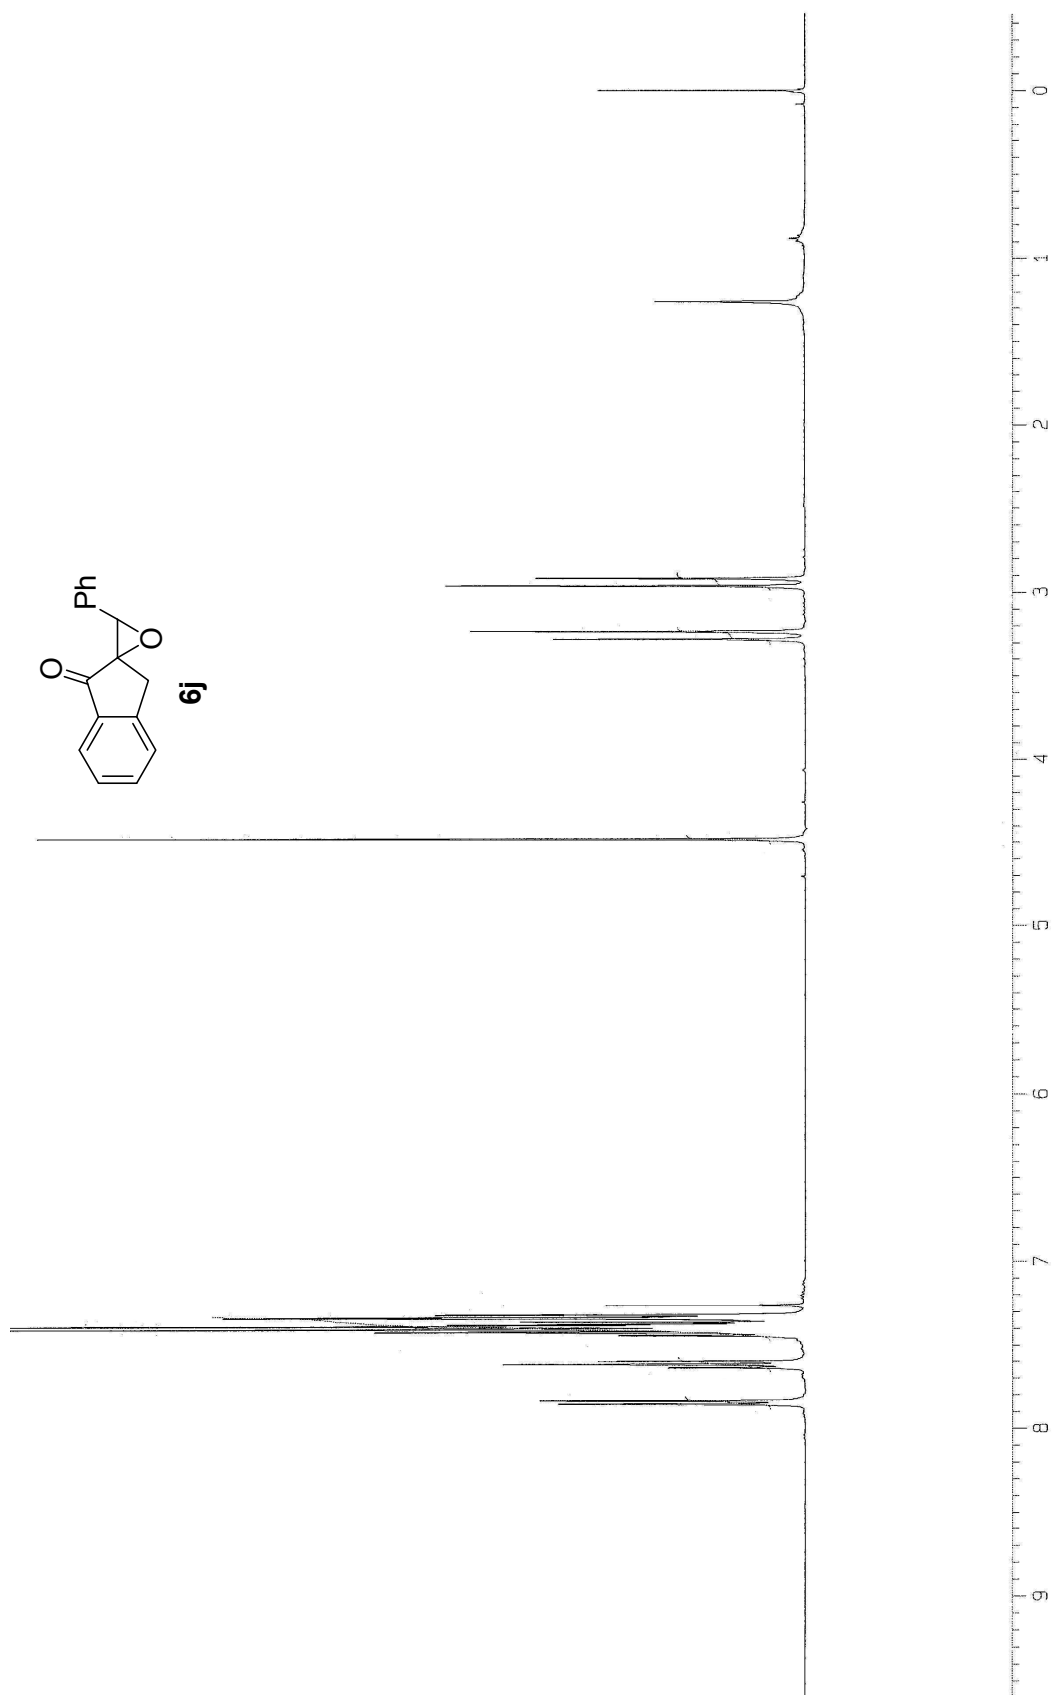

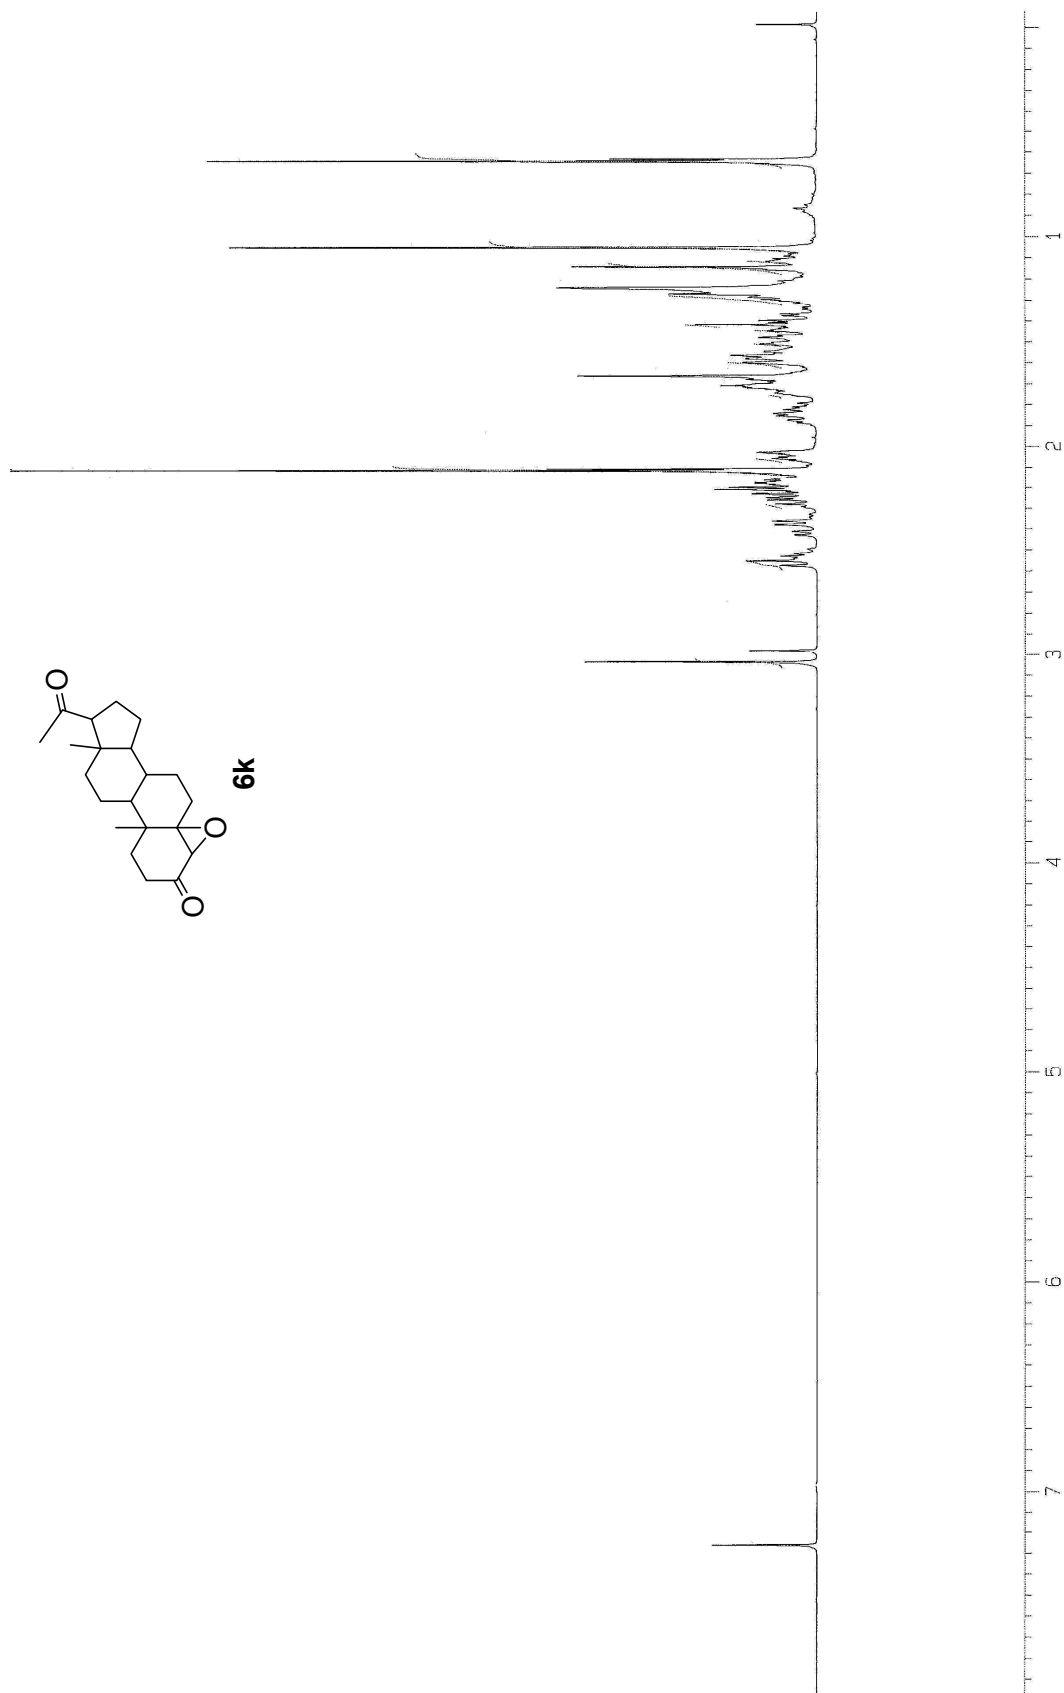

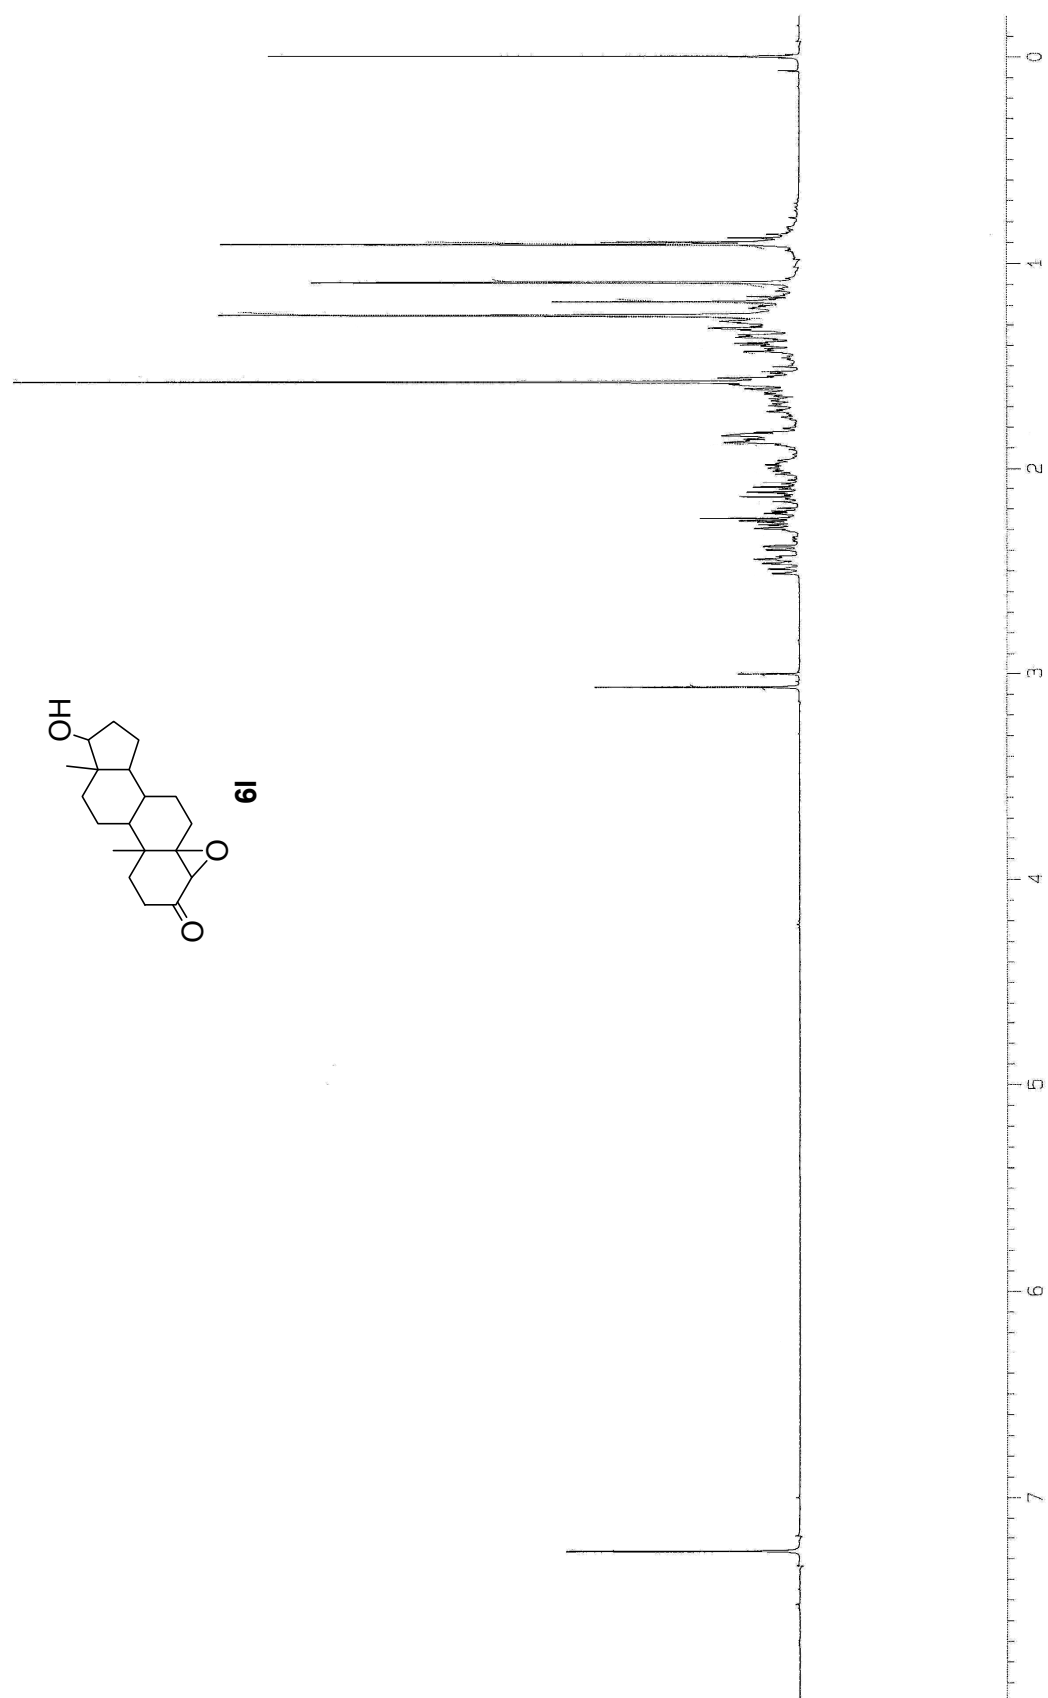



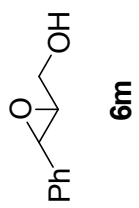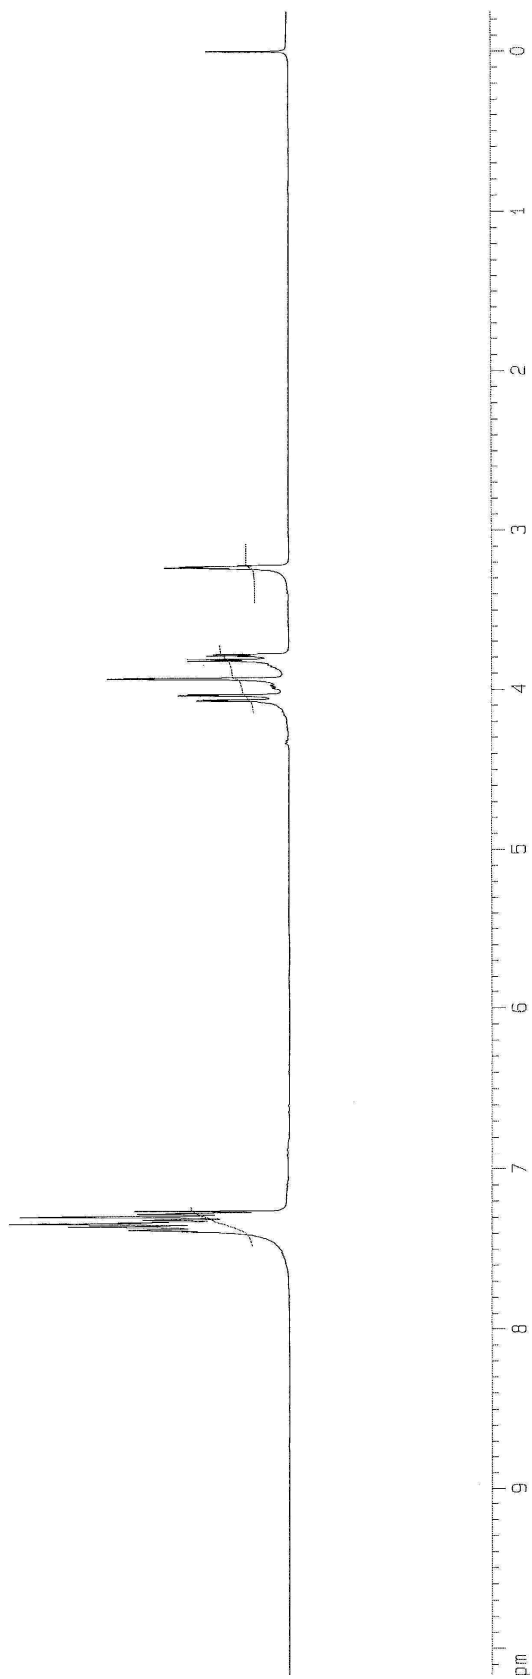

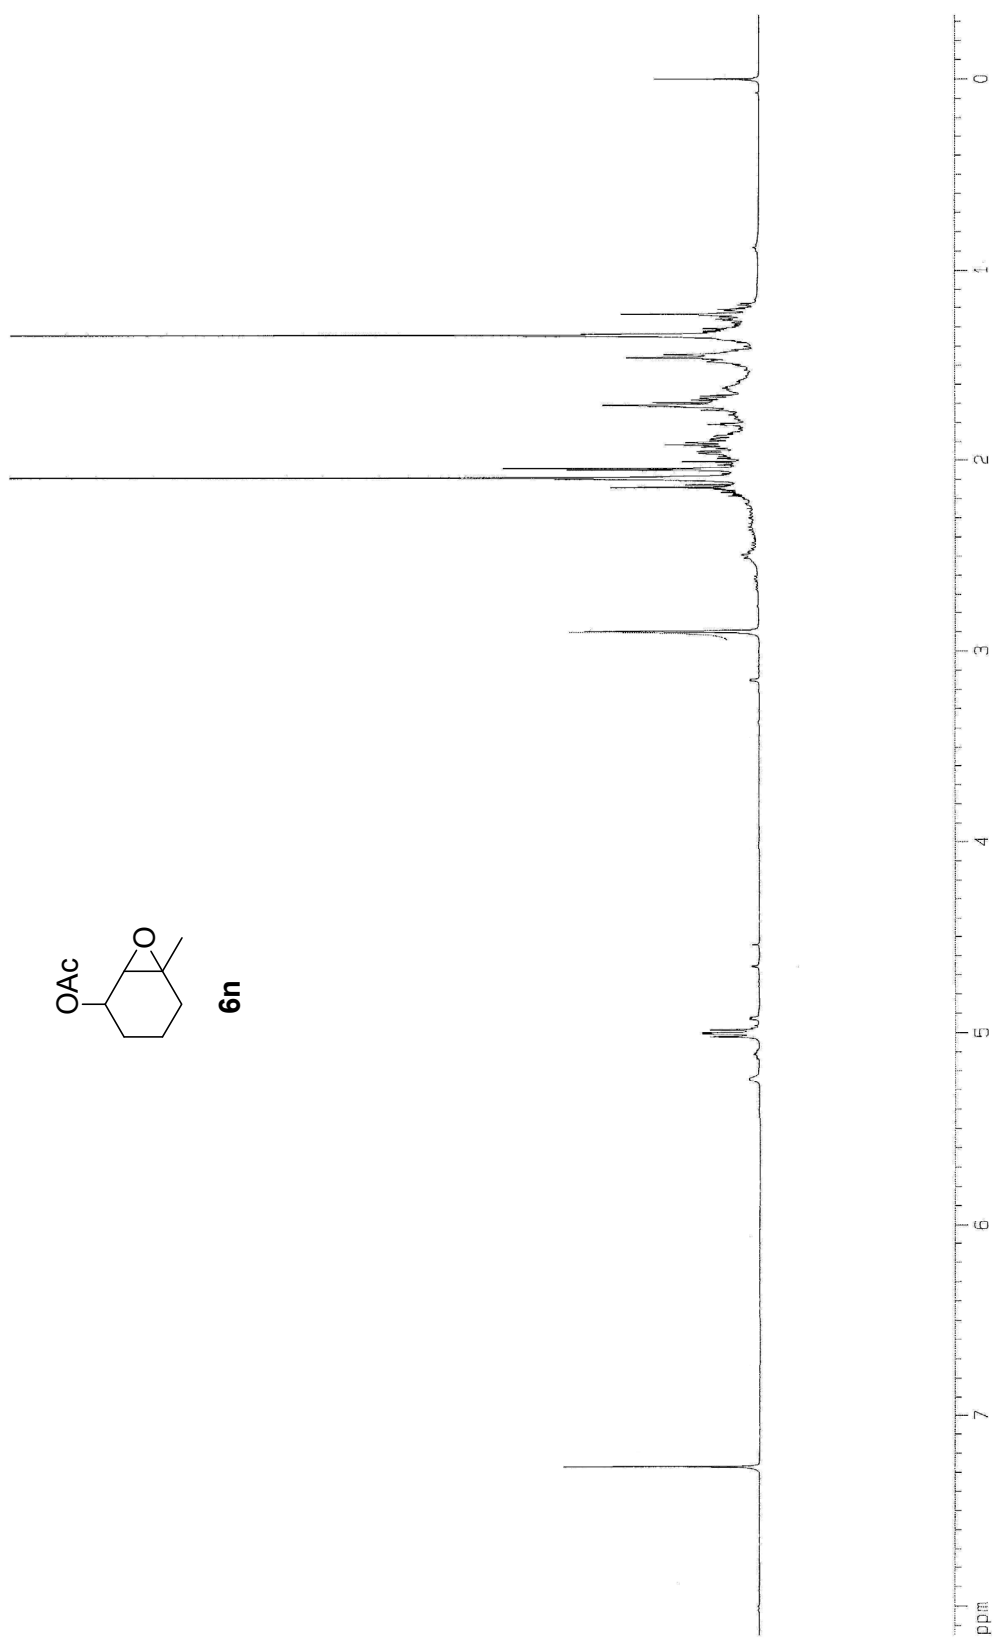

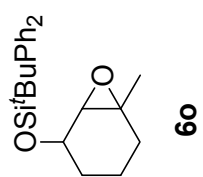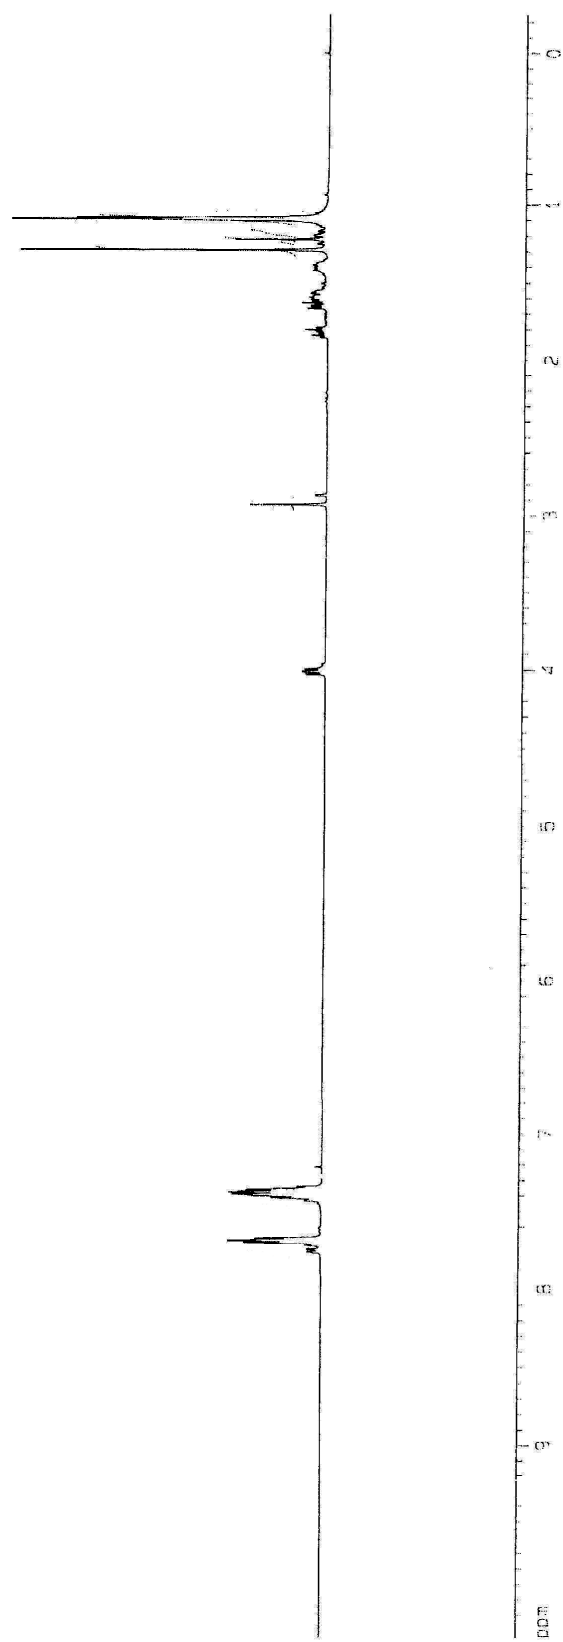

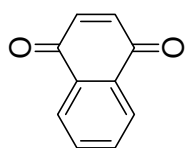

**8a**

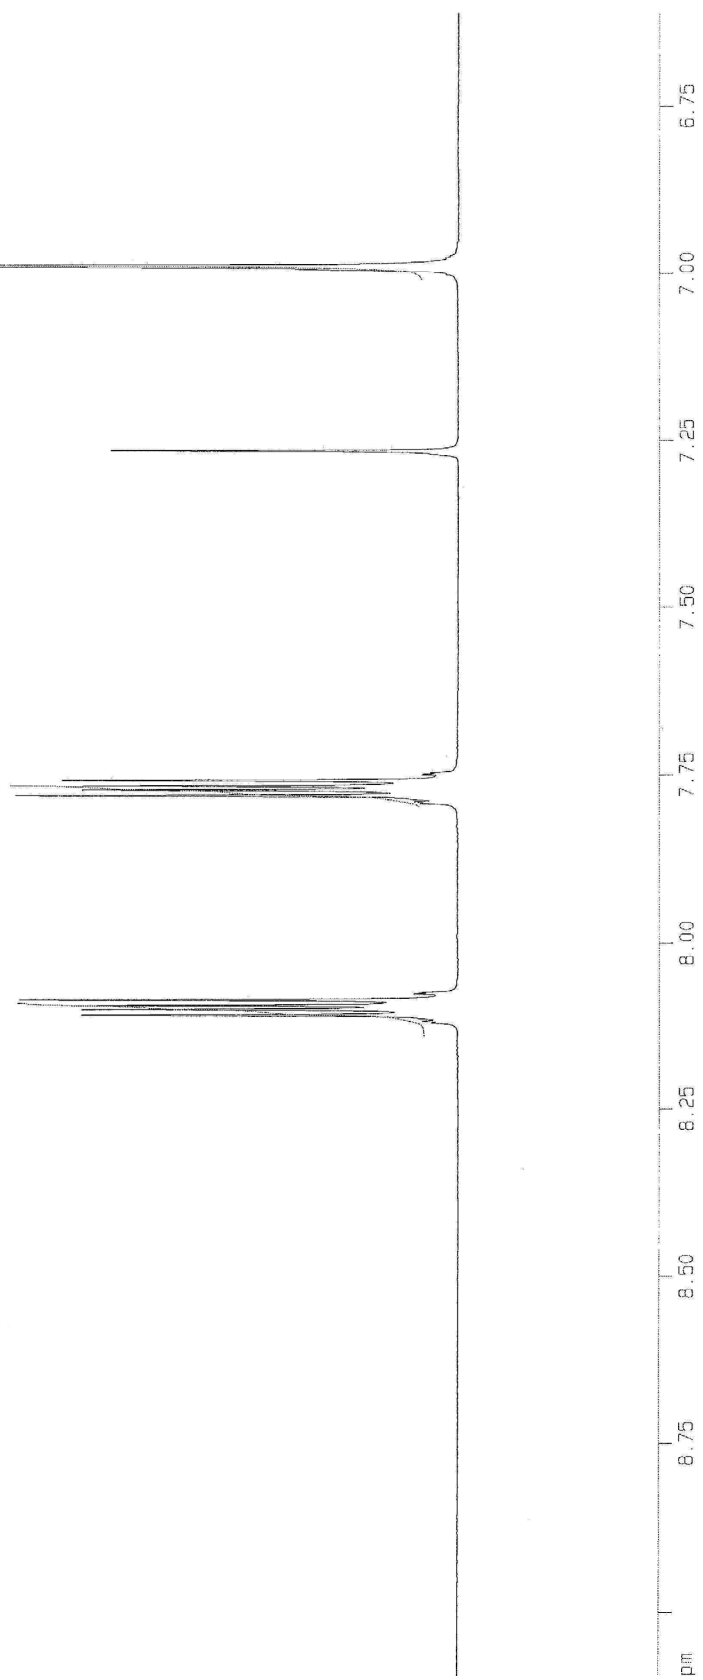

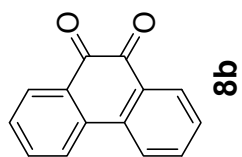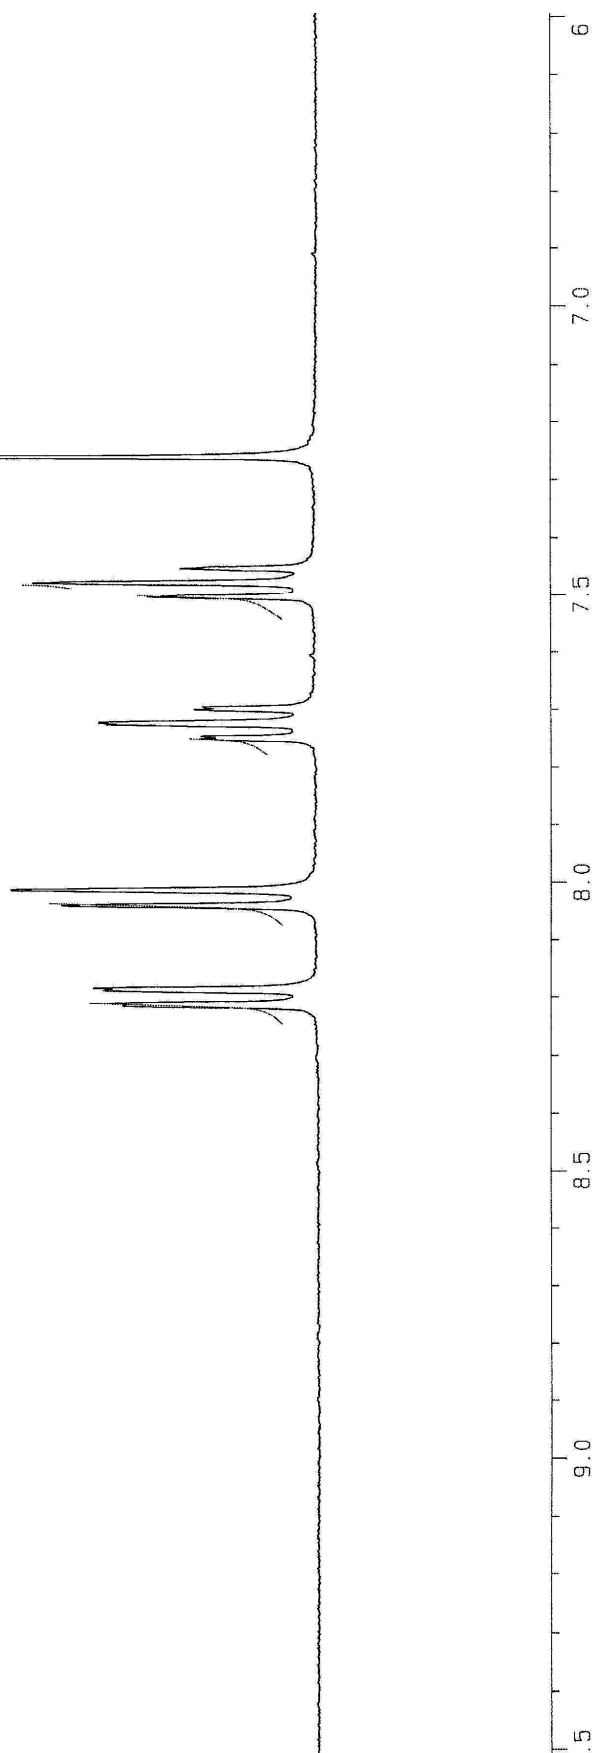

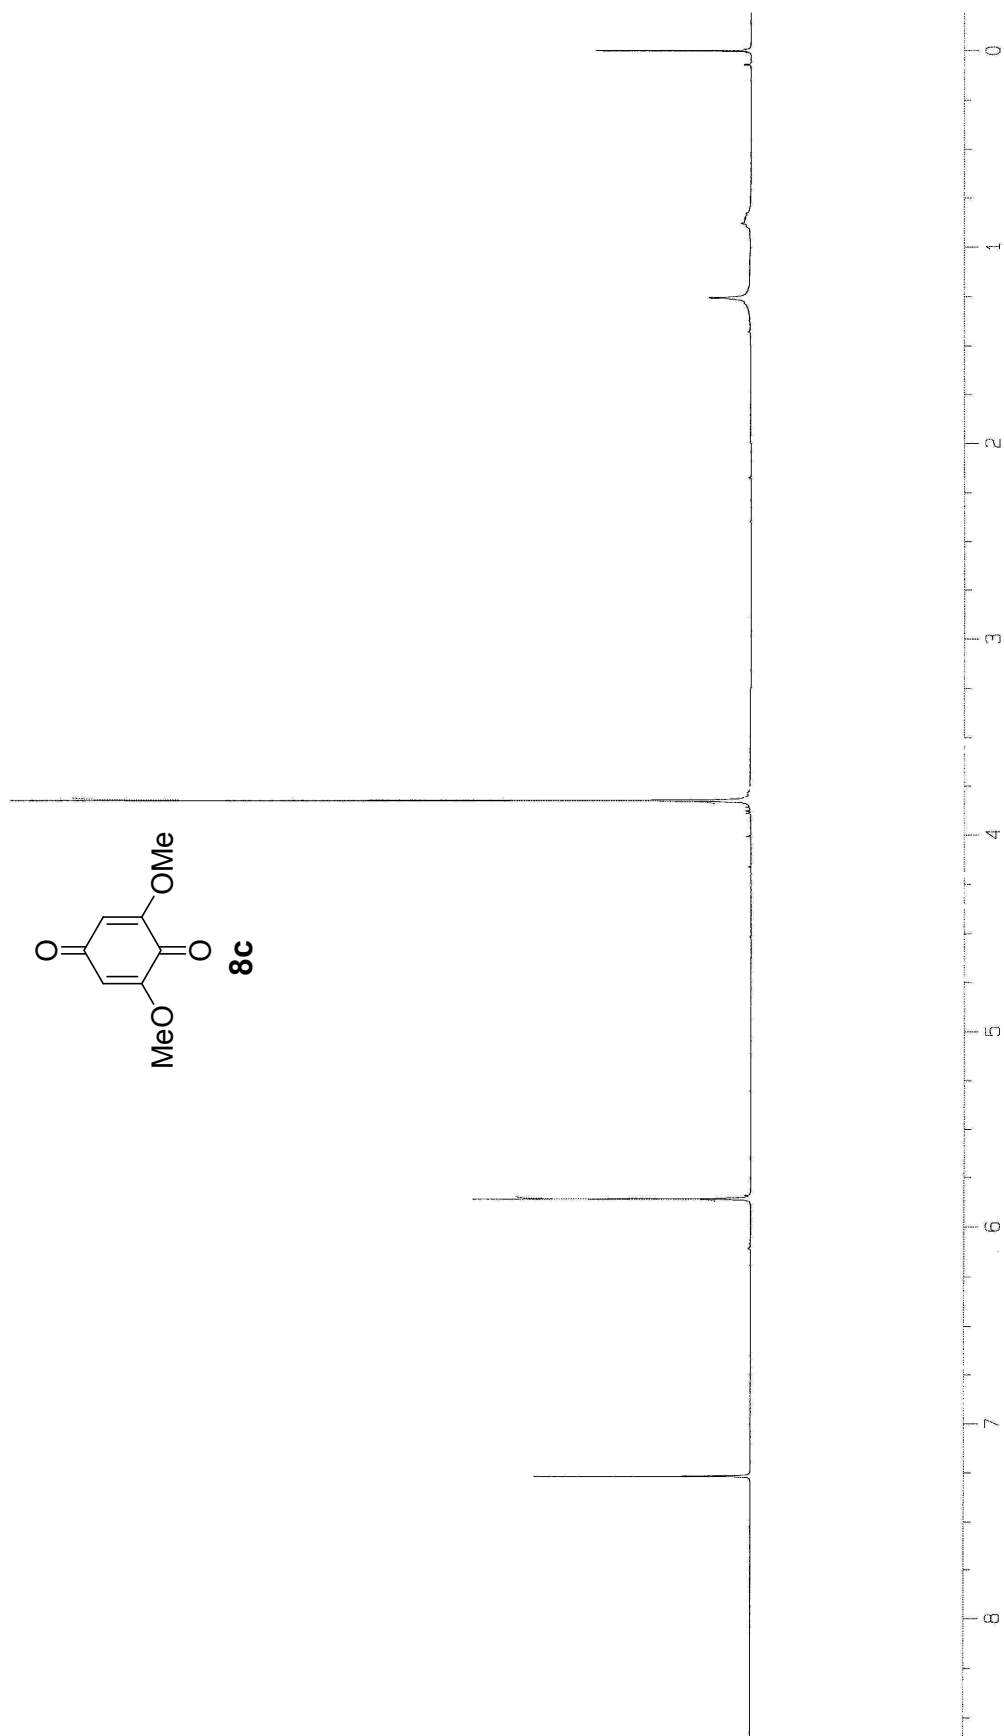

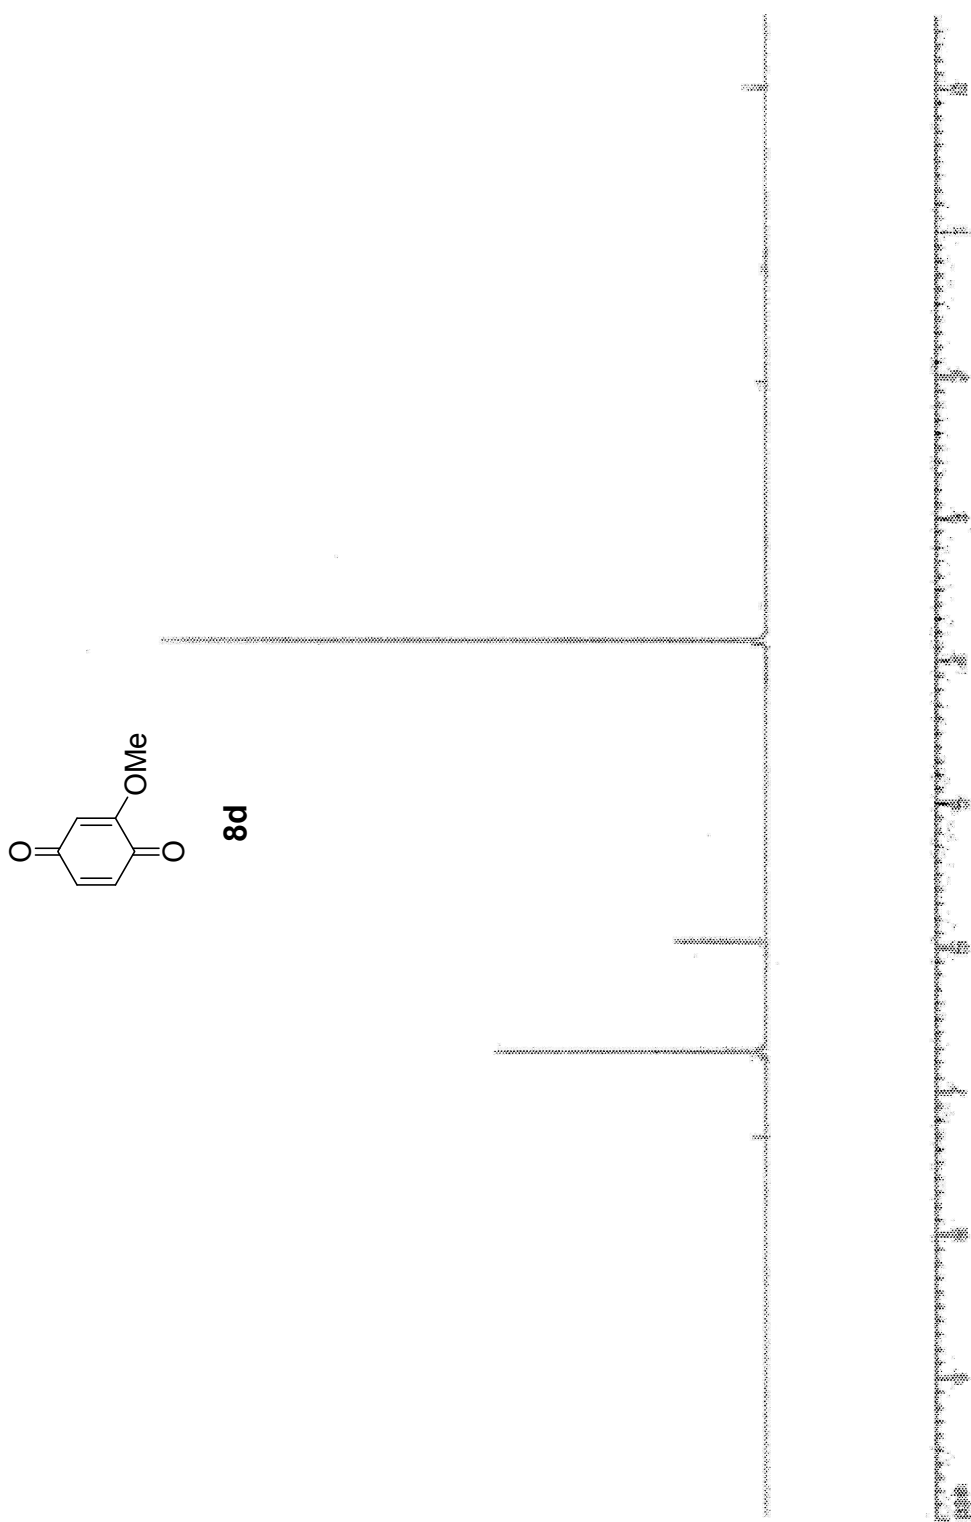

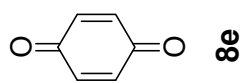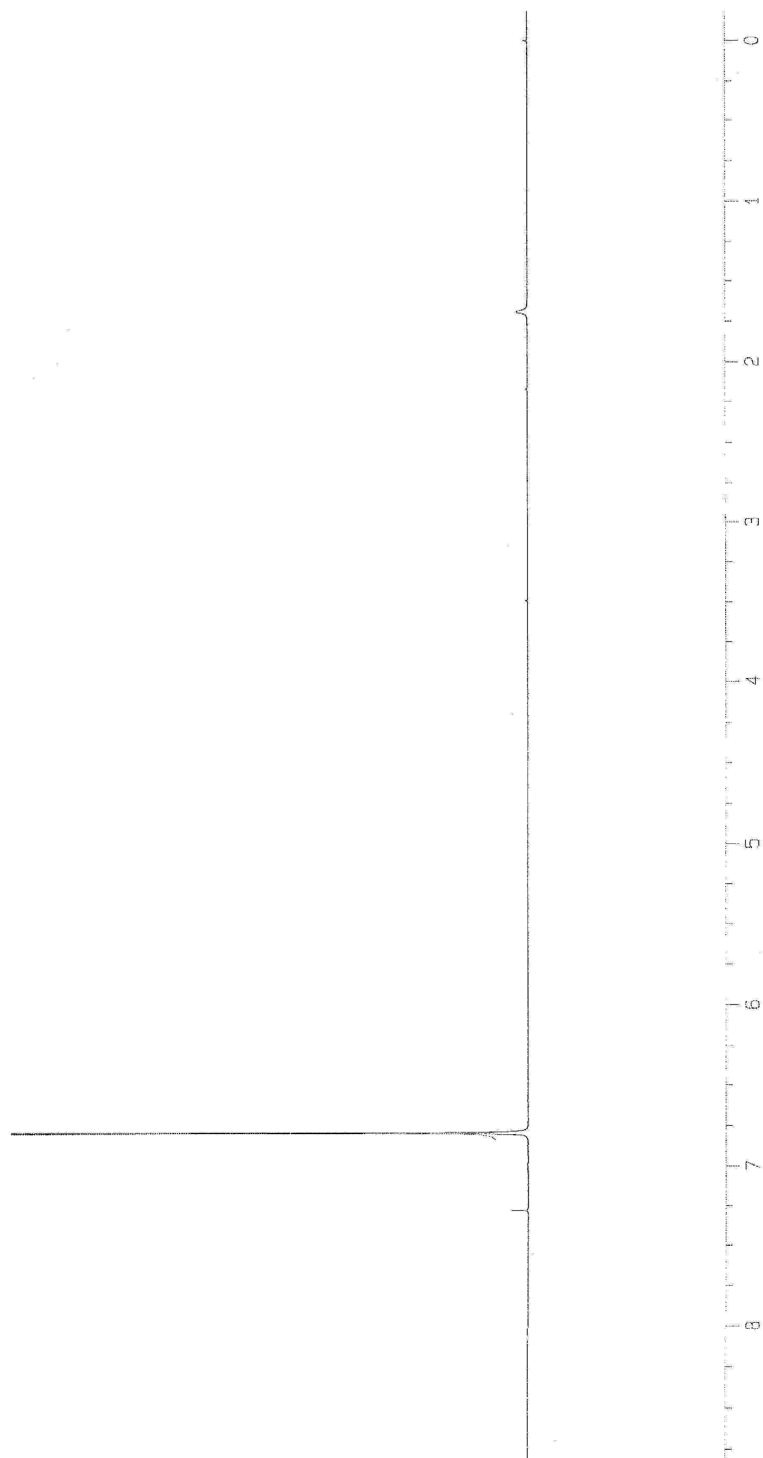



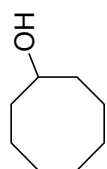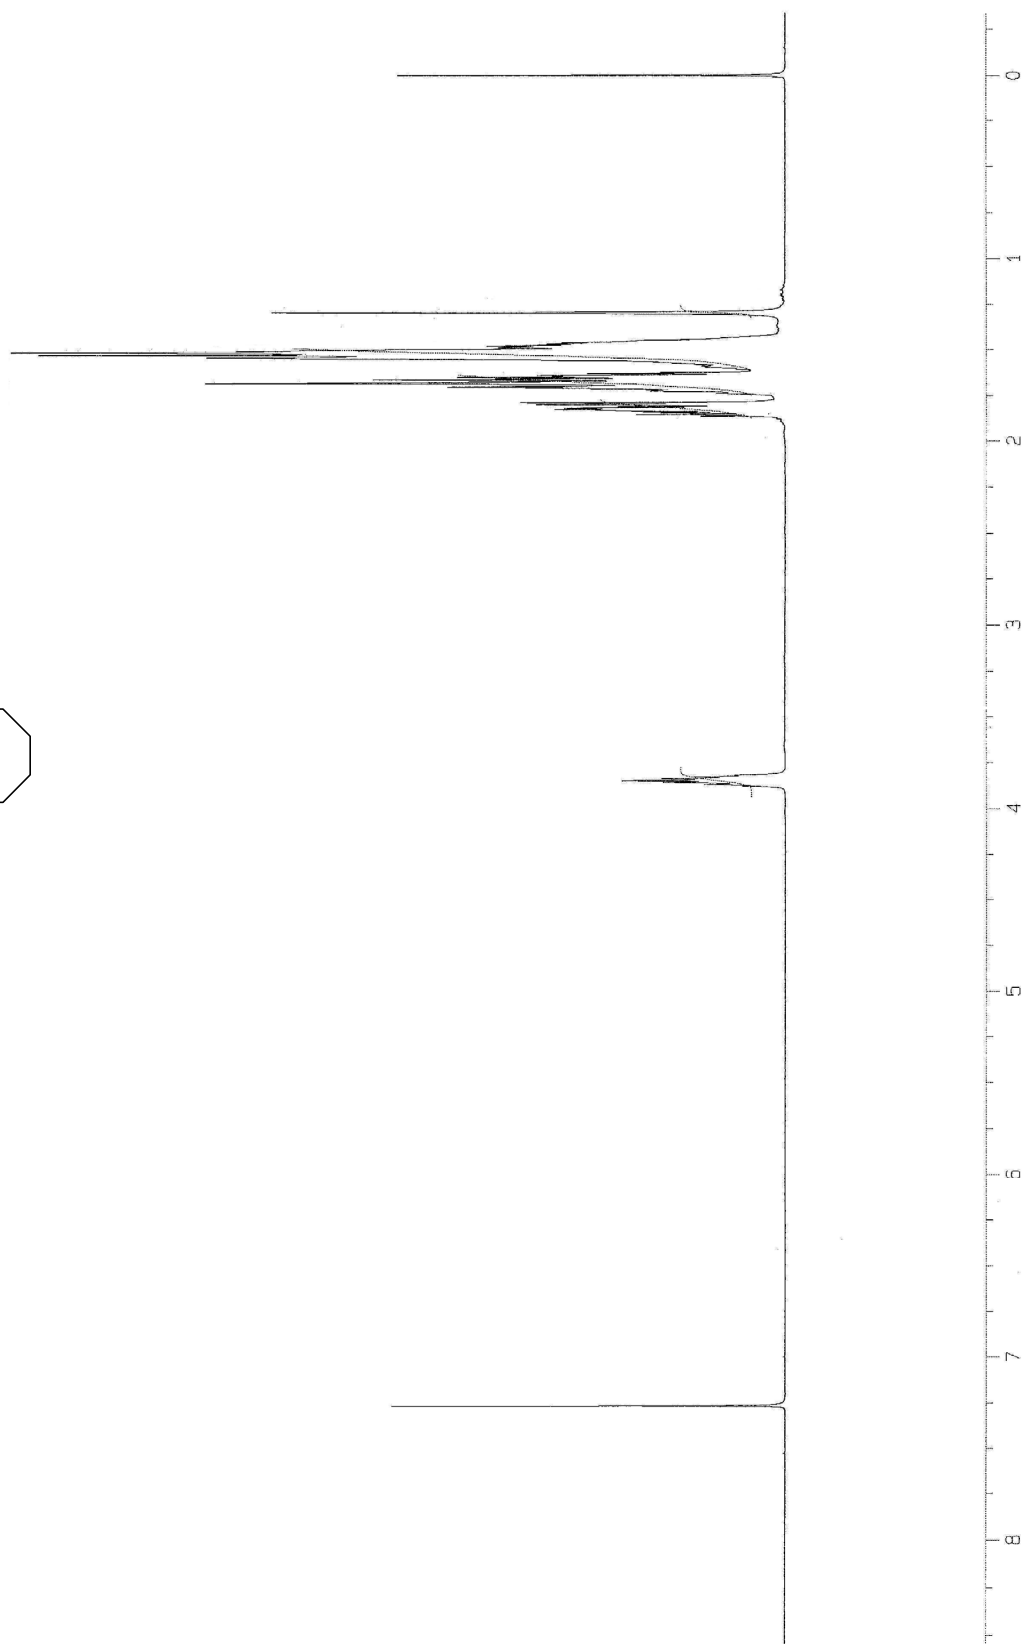

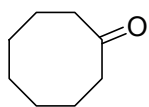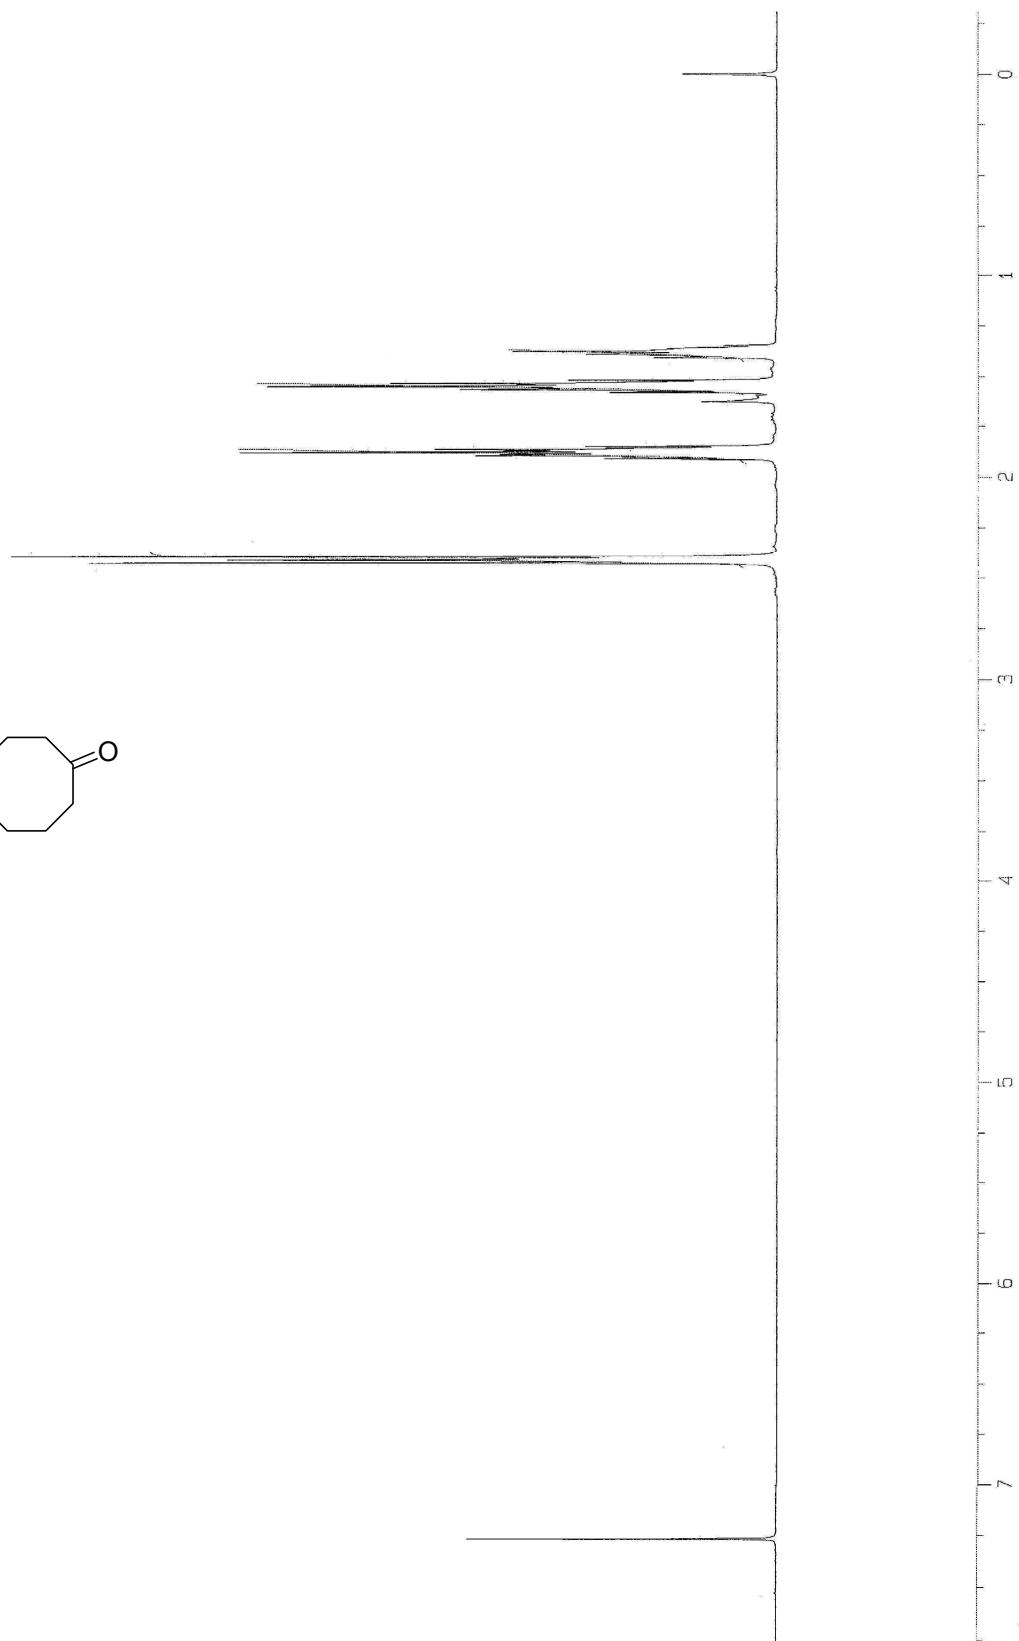

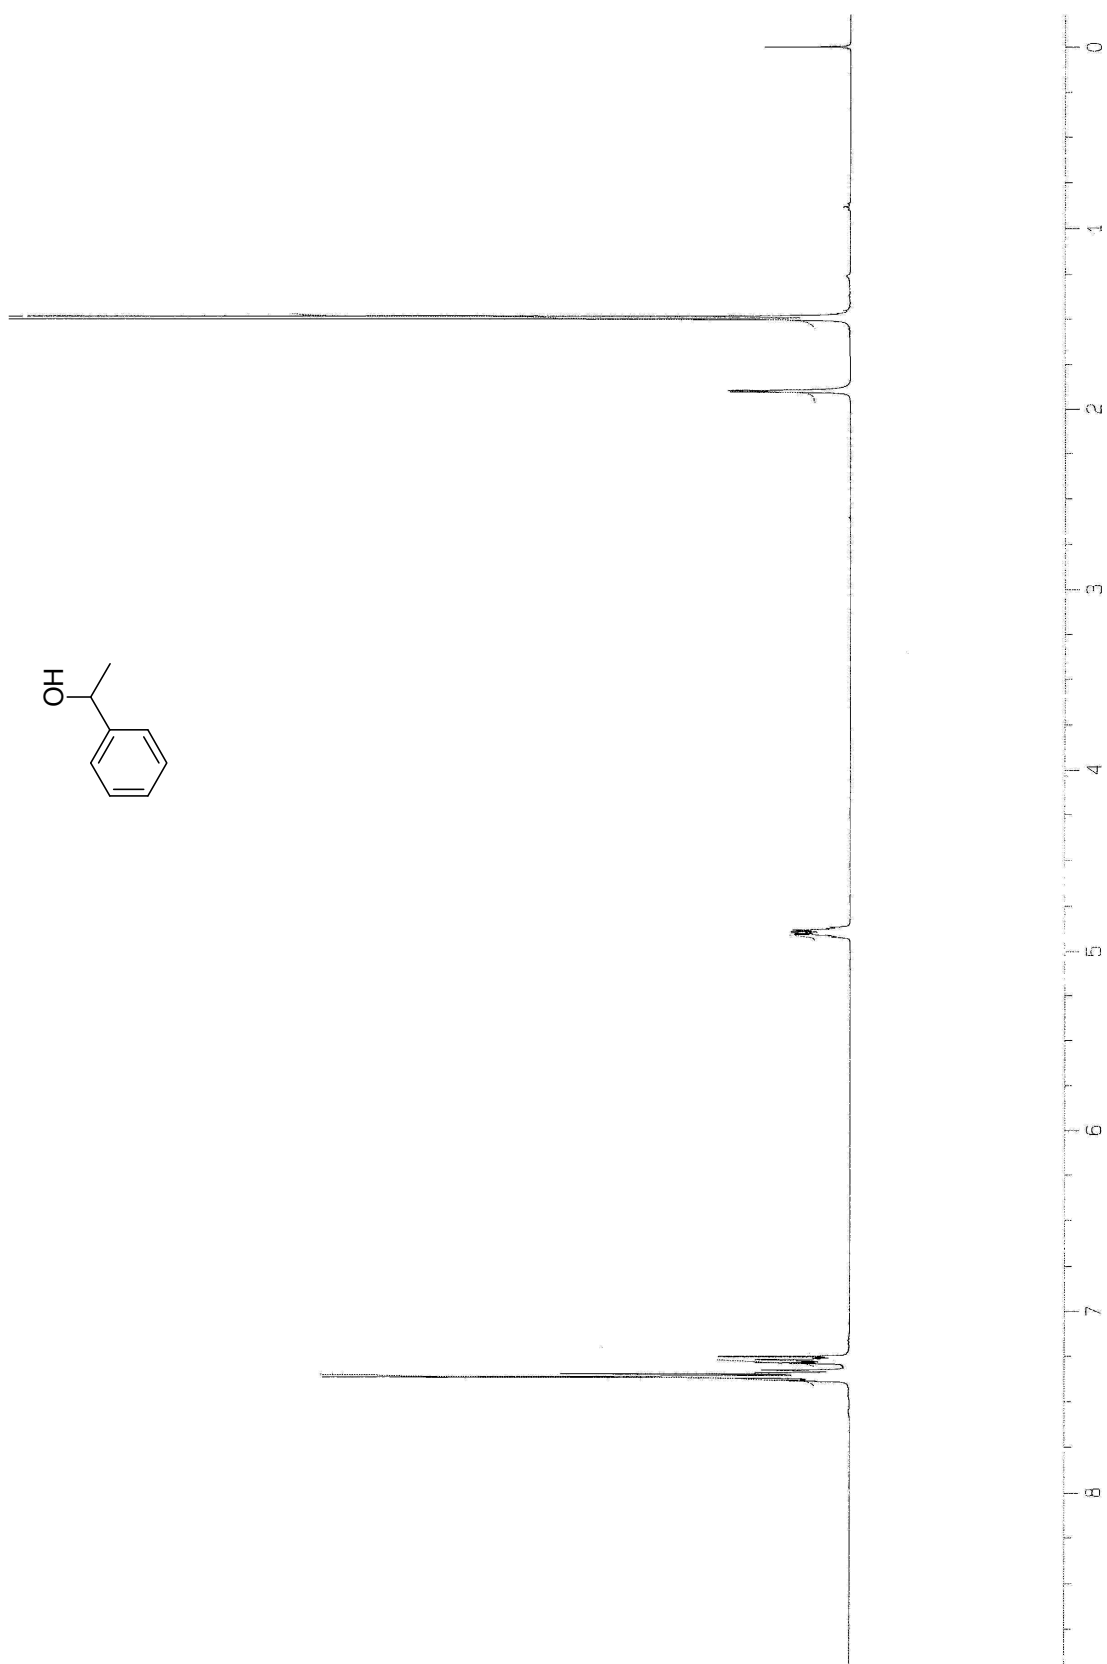

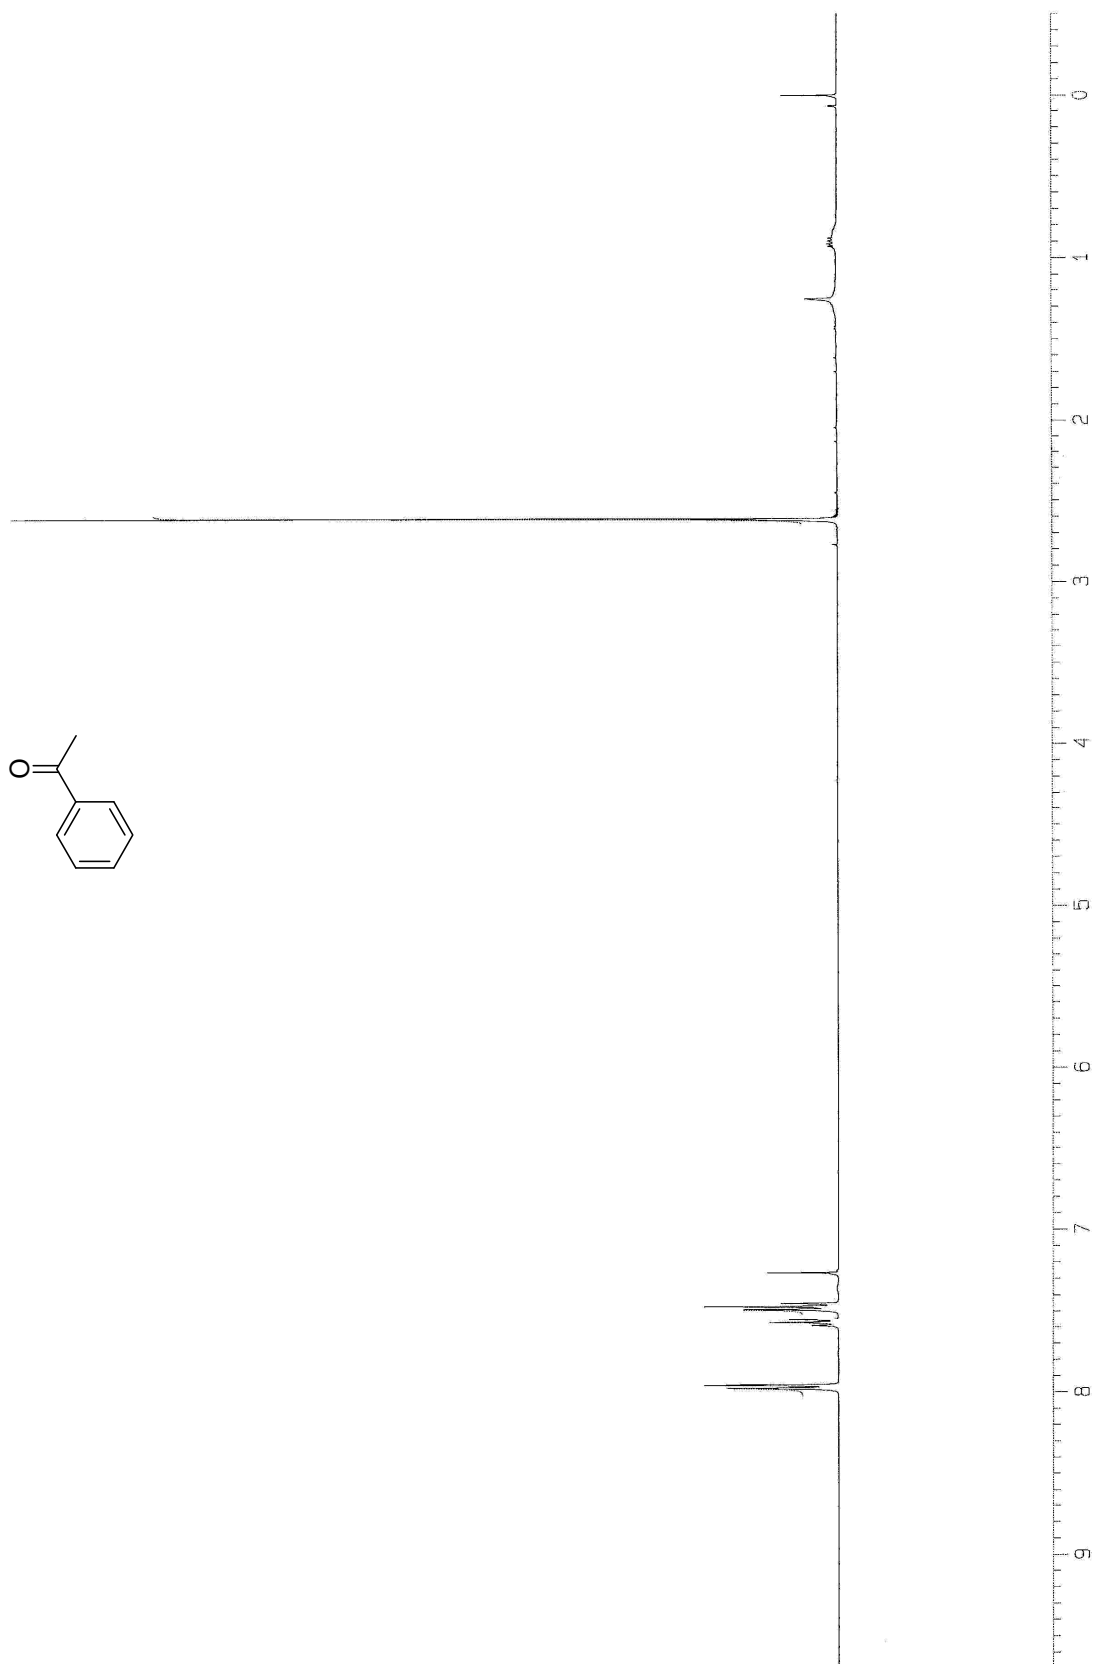

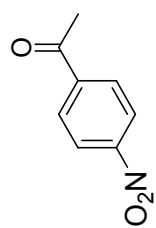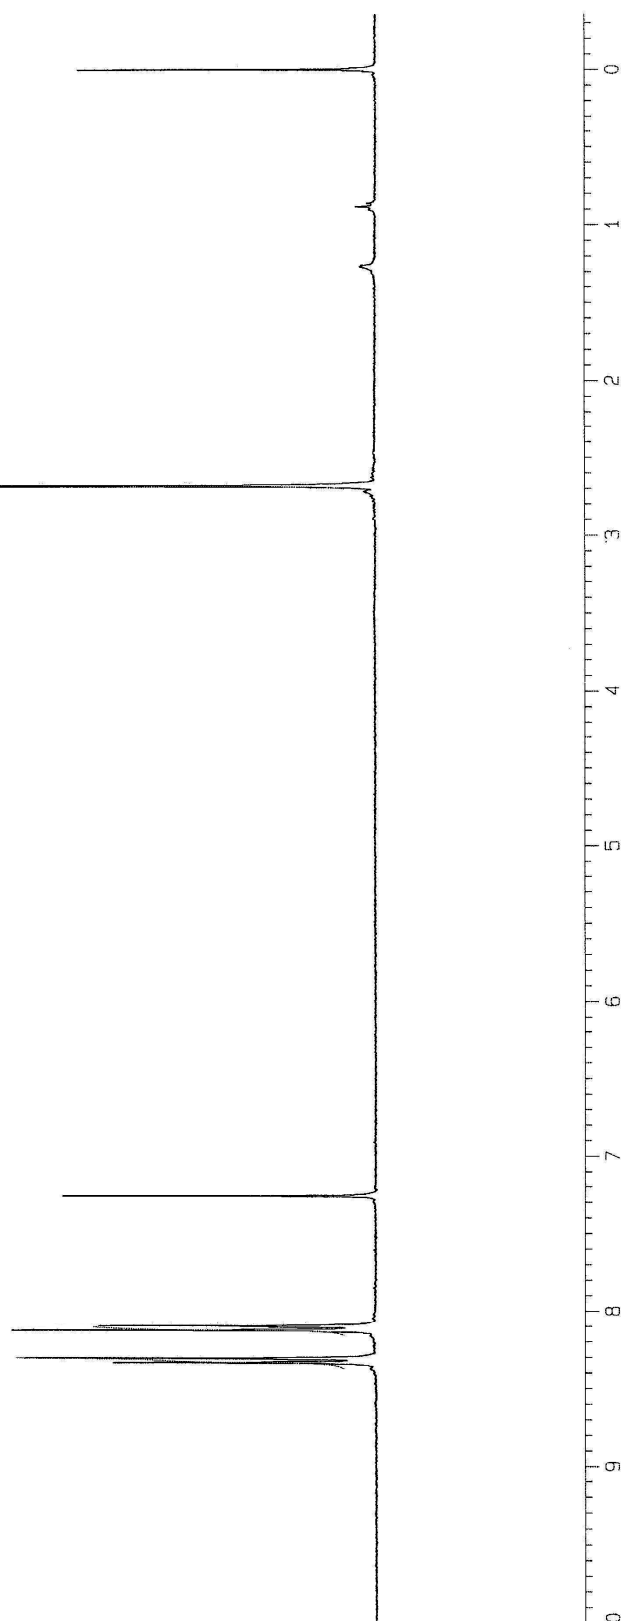

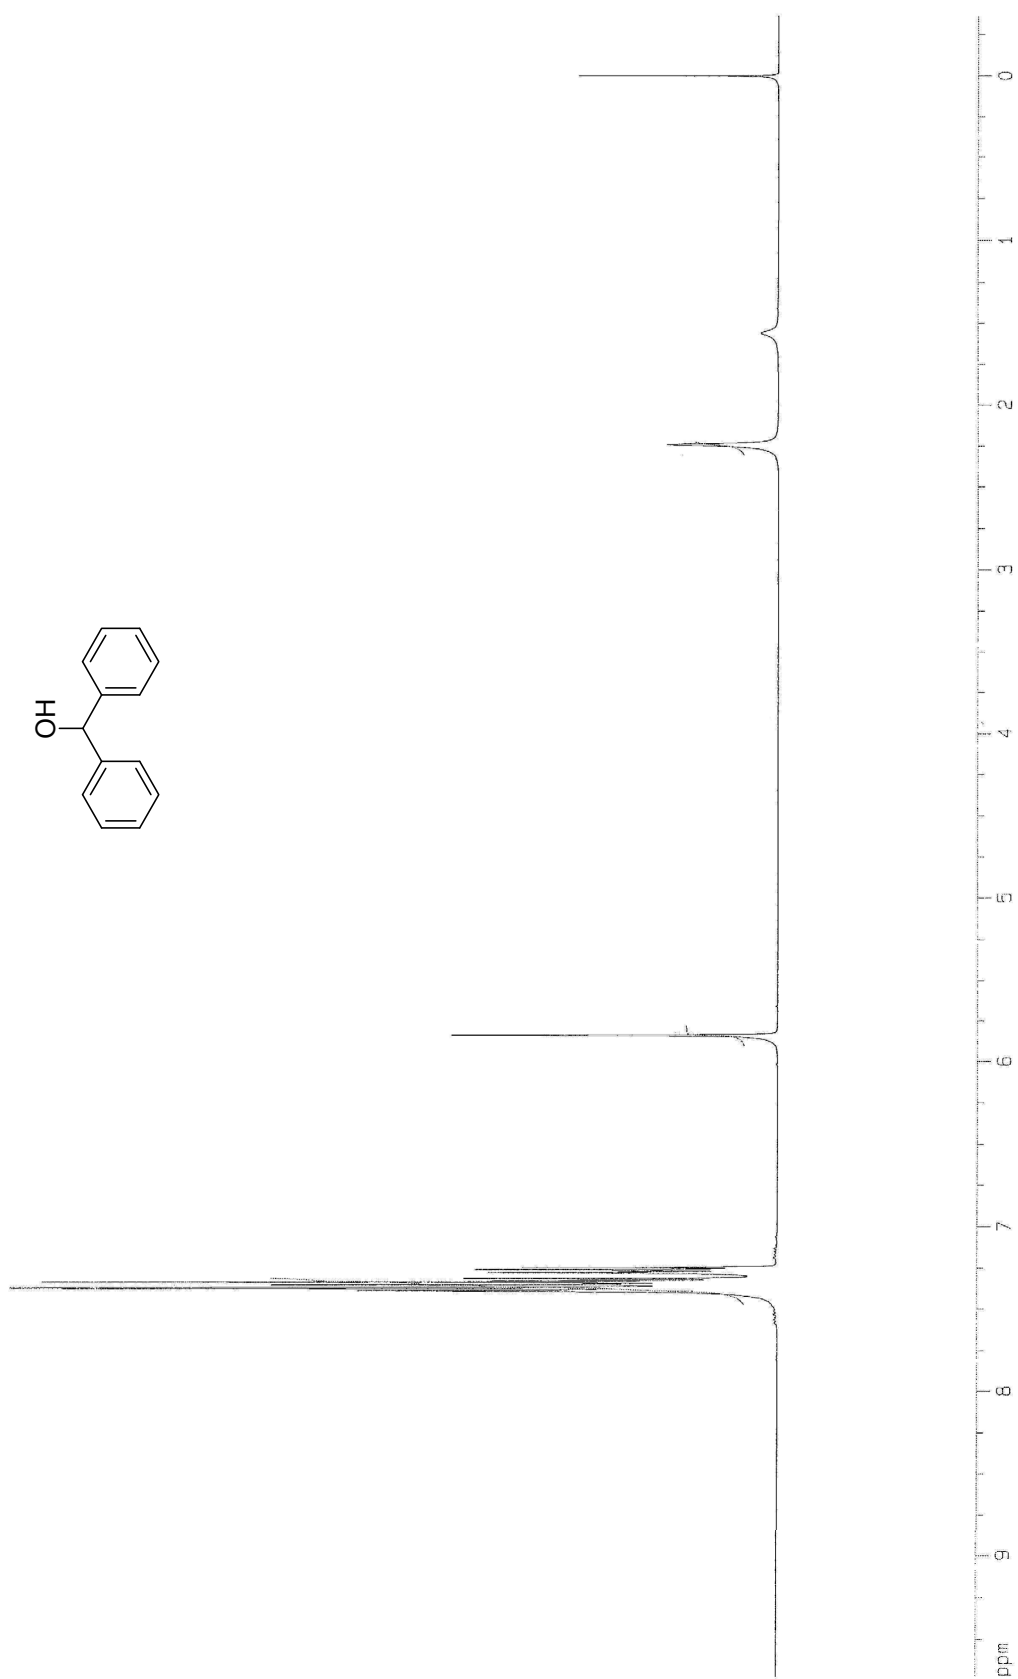

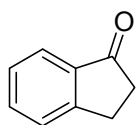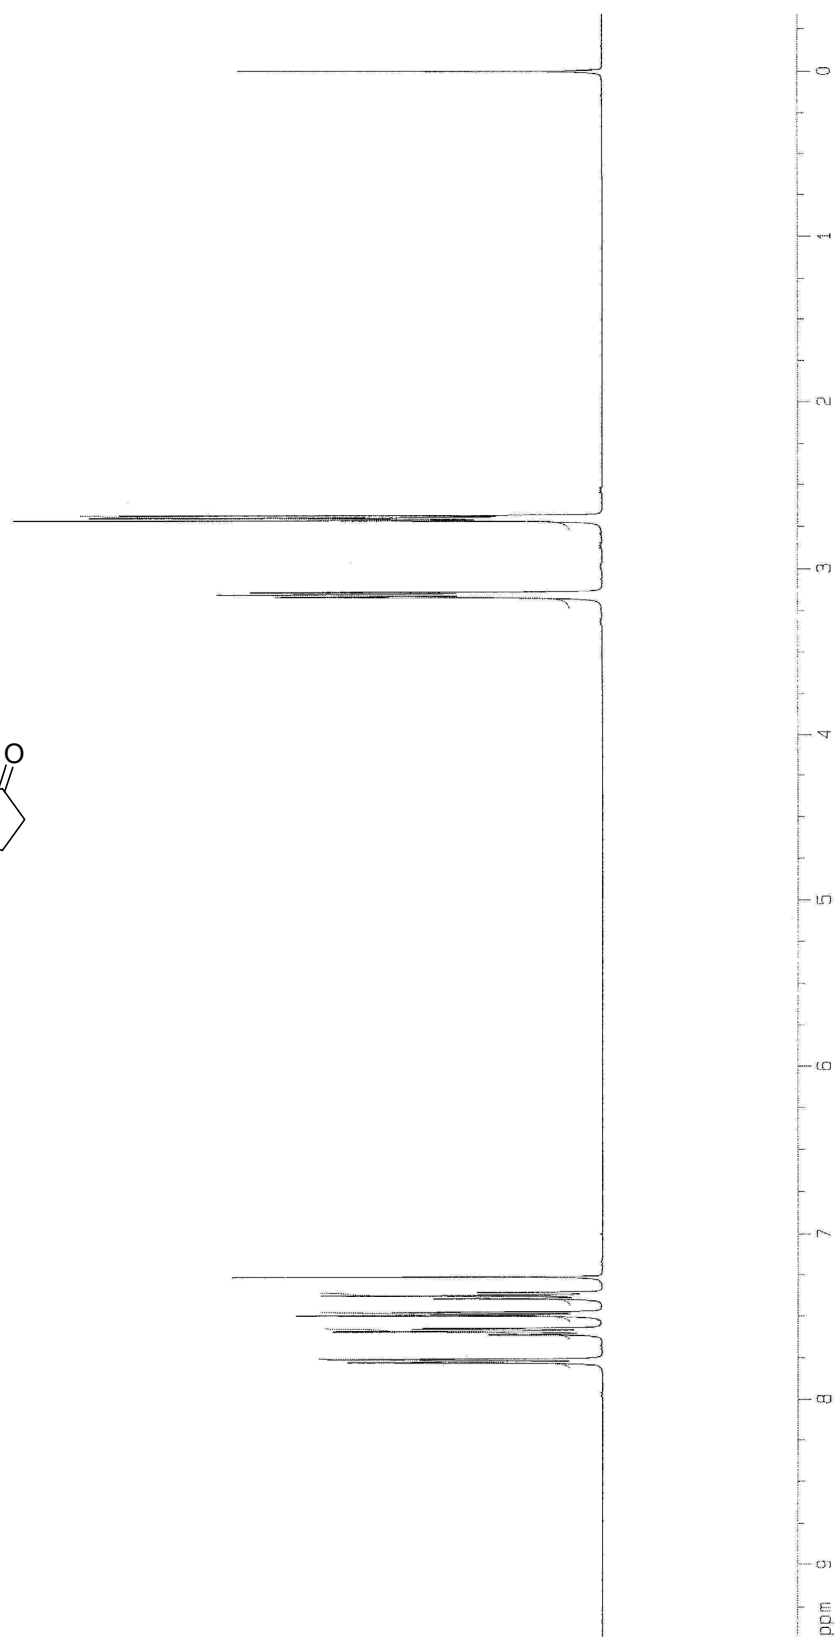

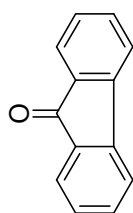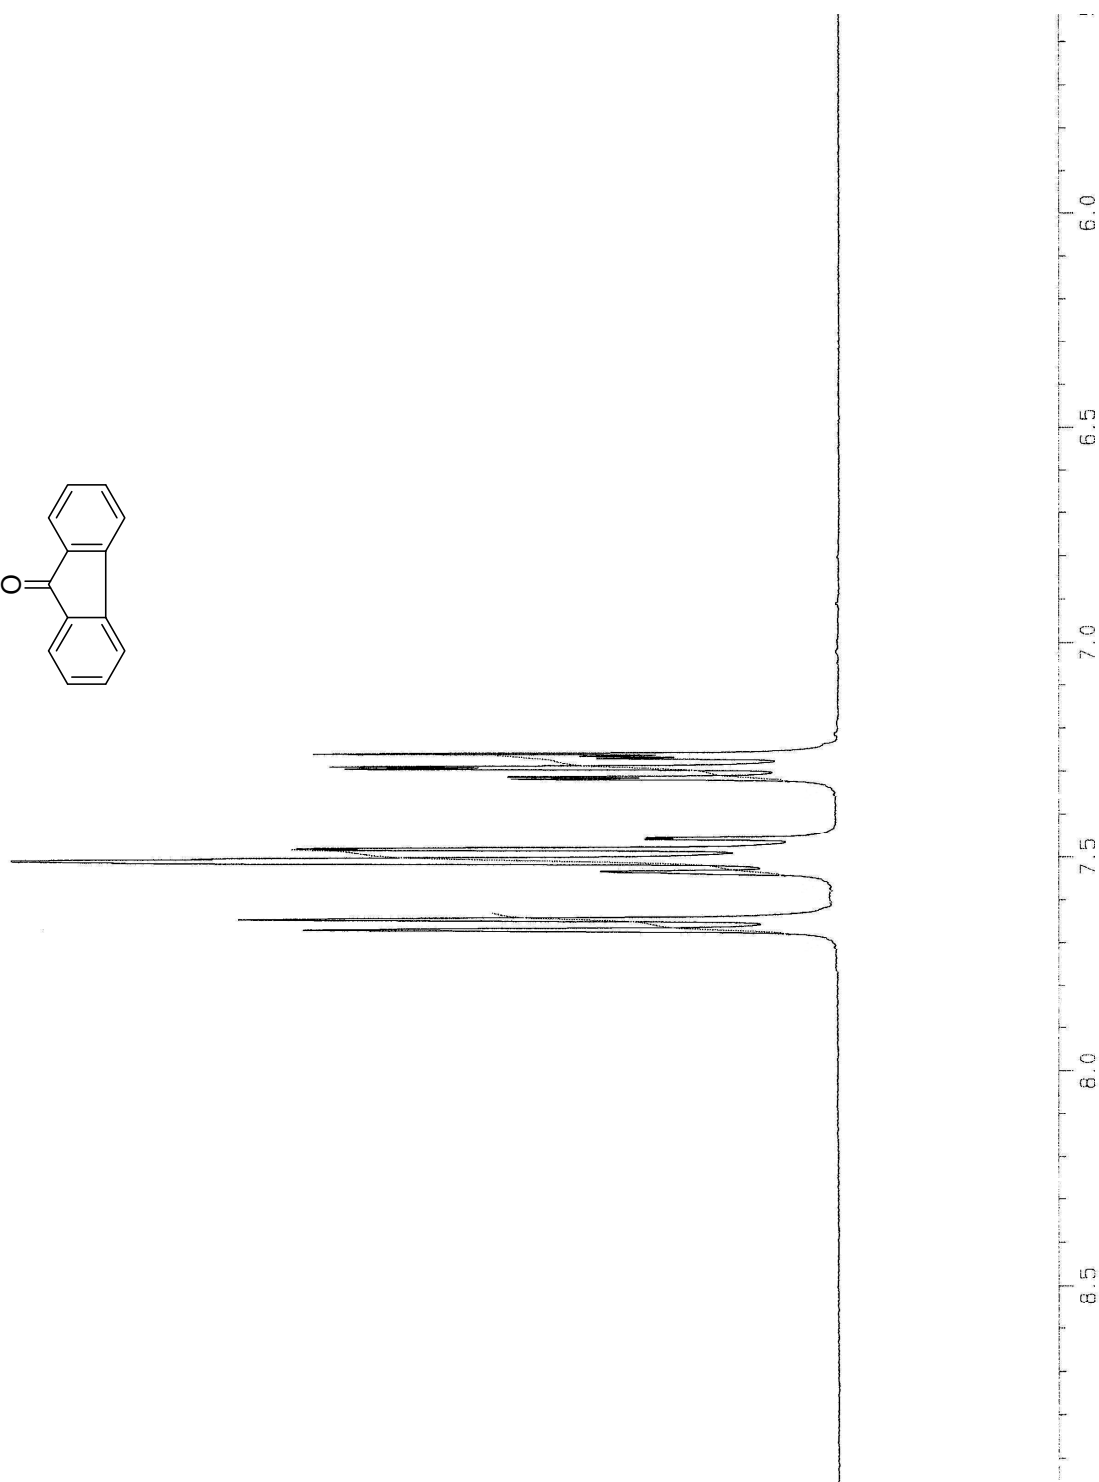



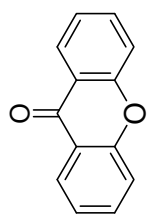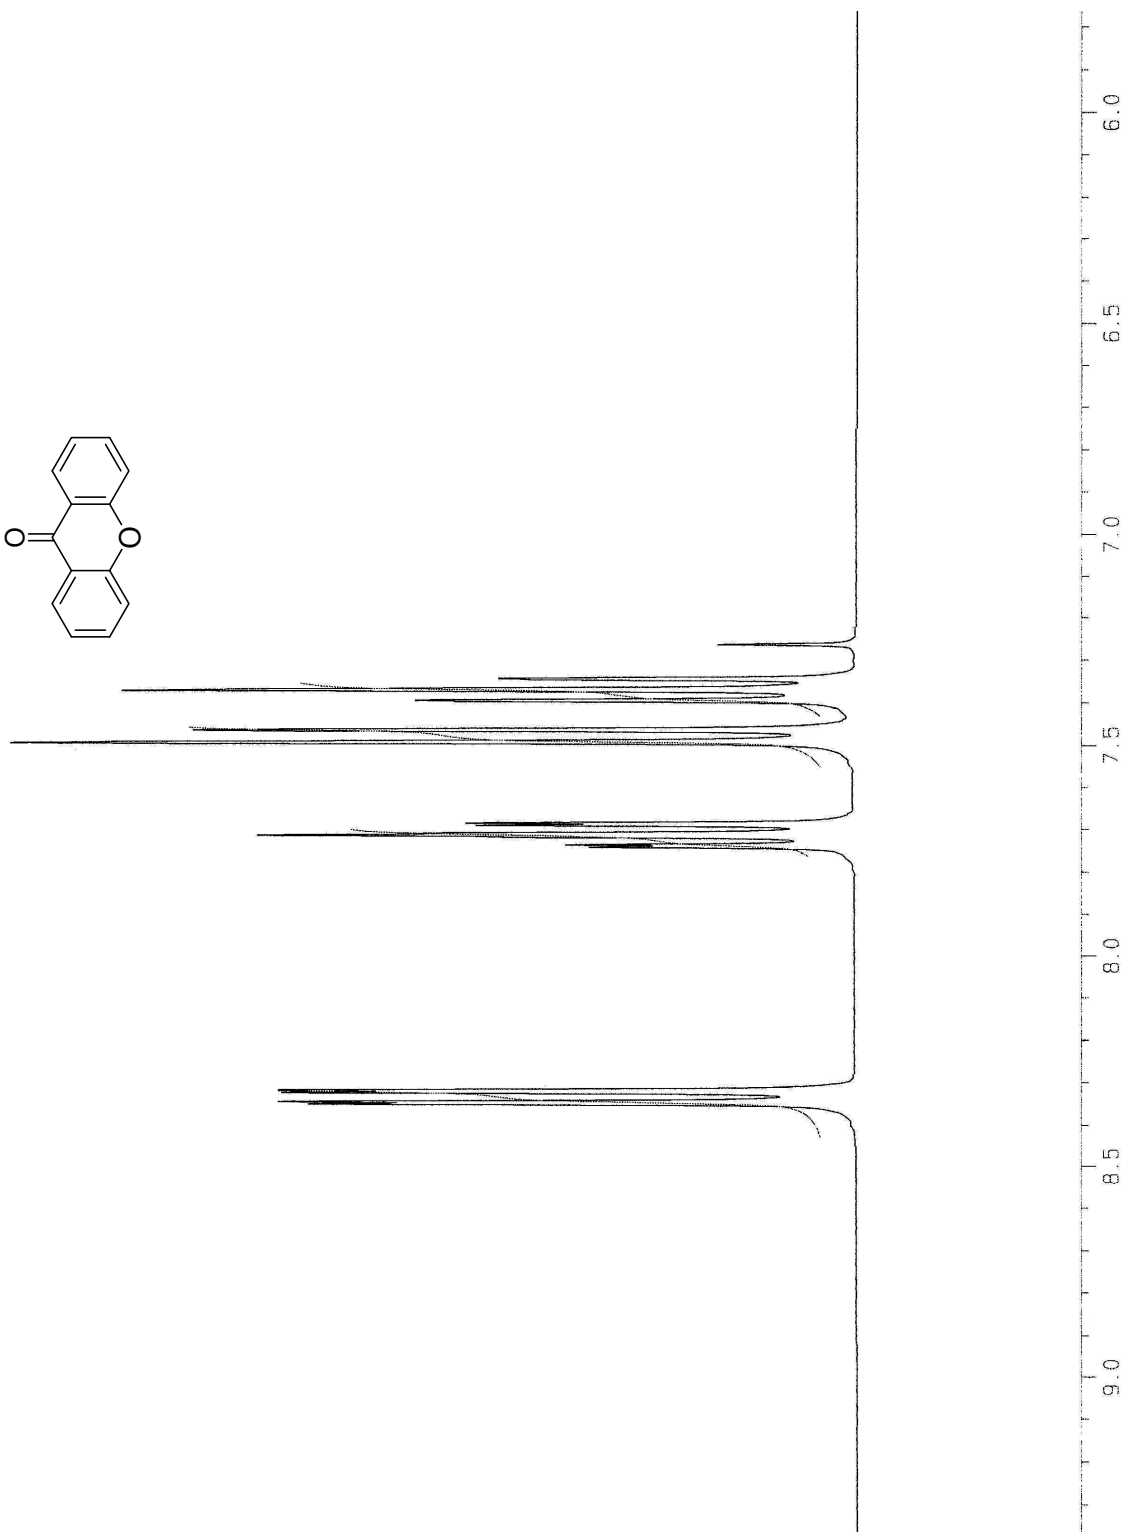

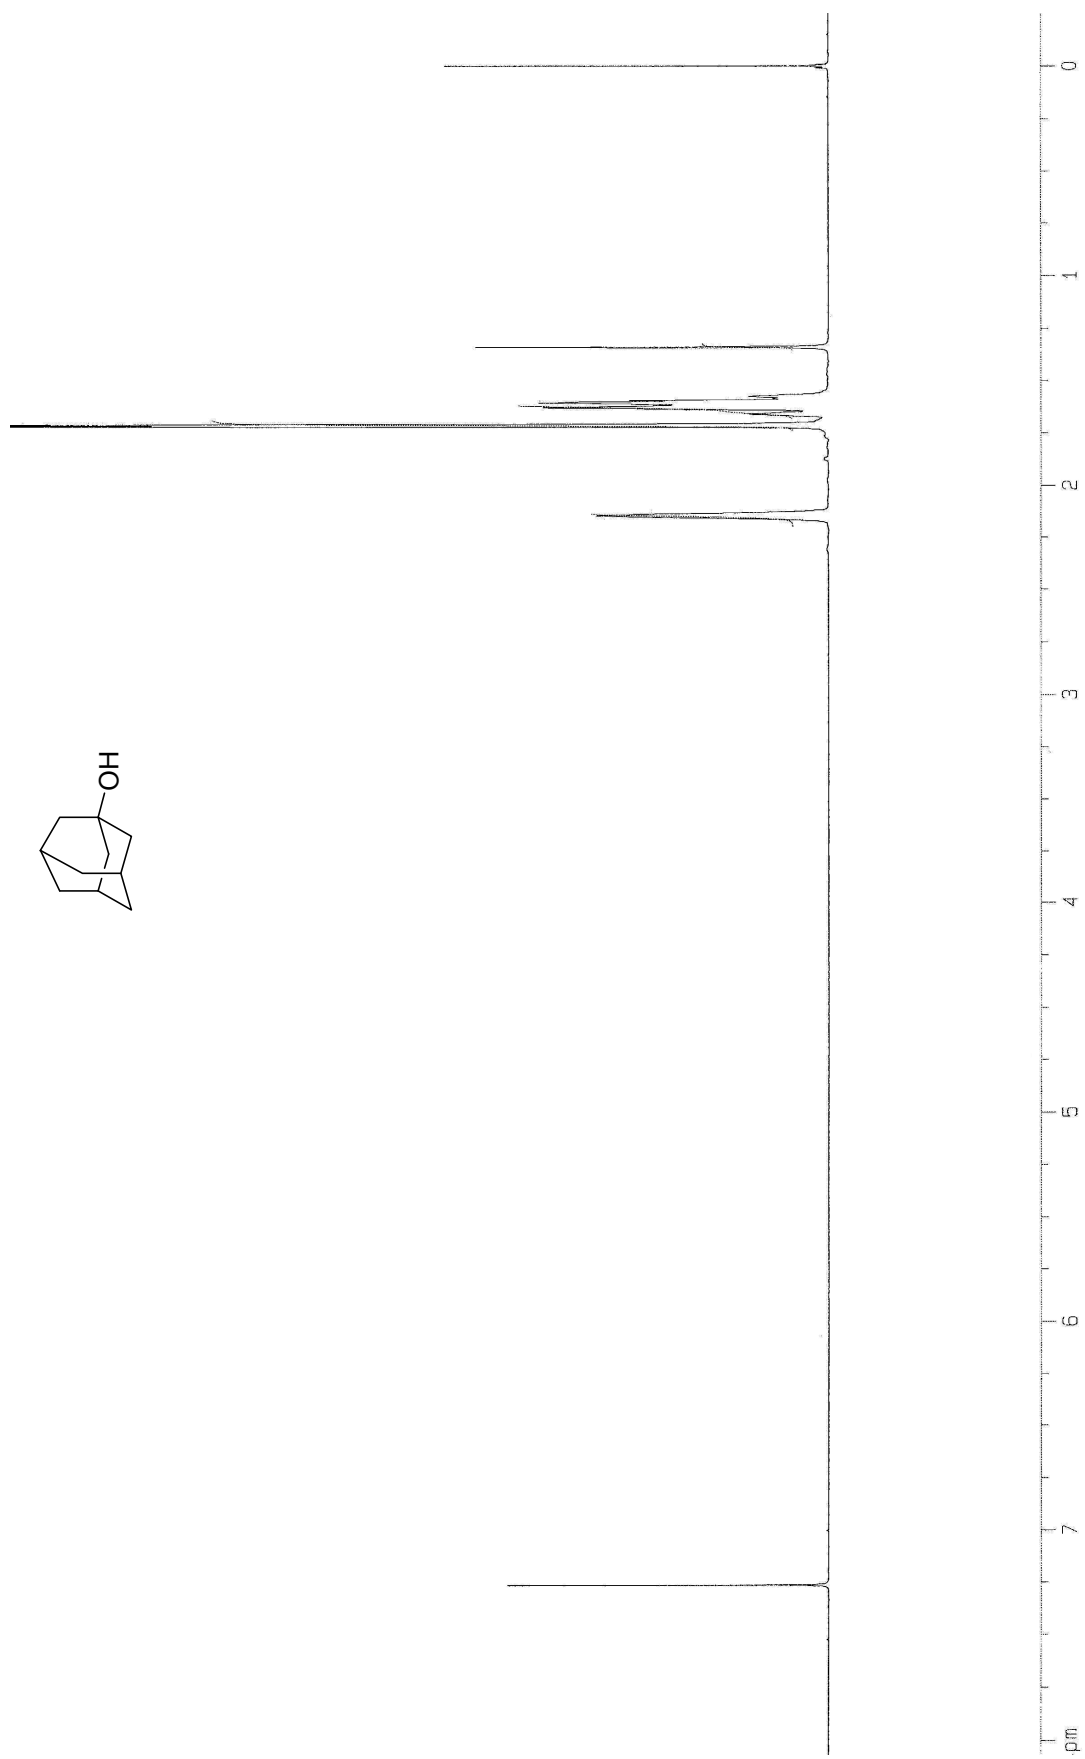

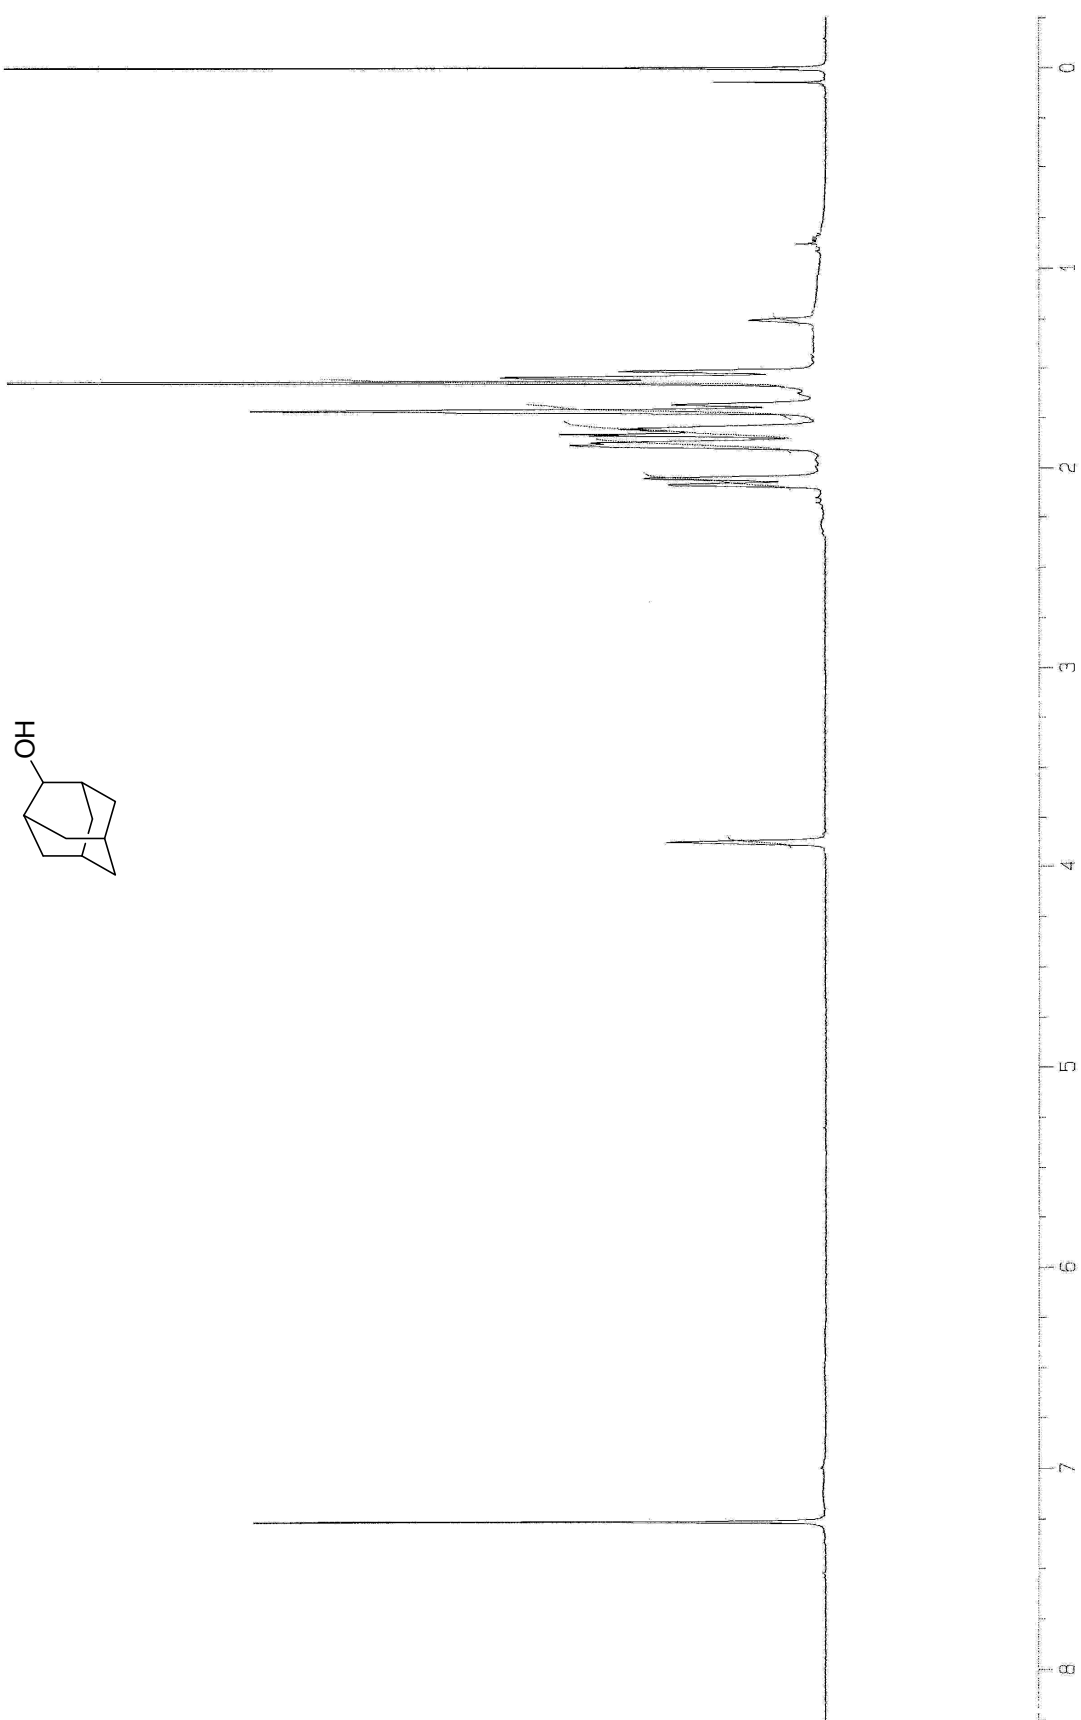

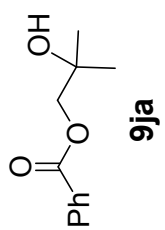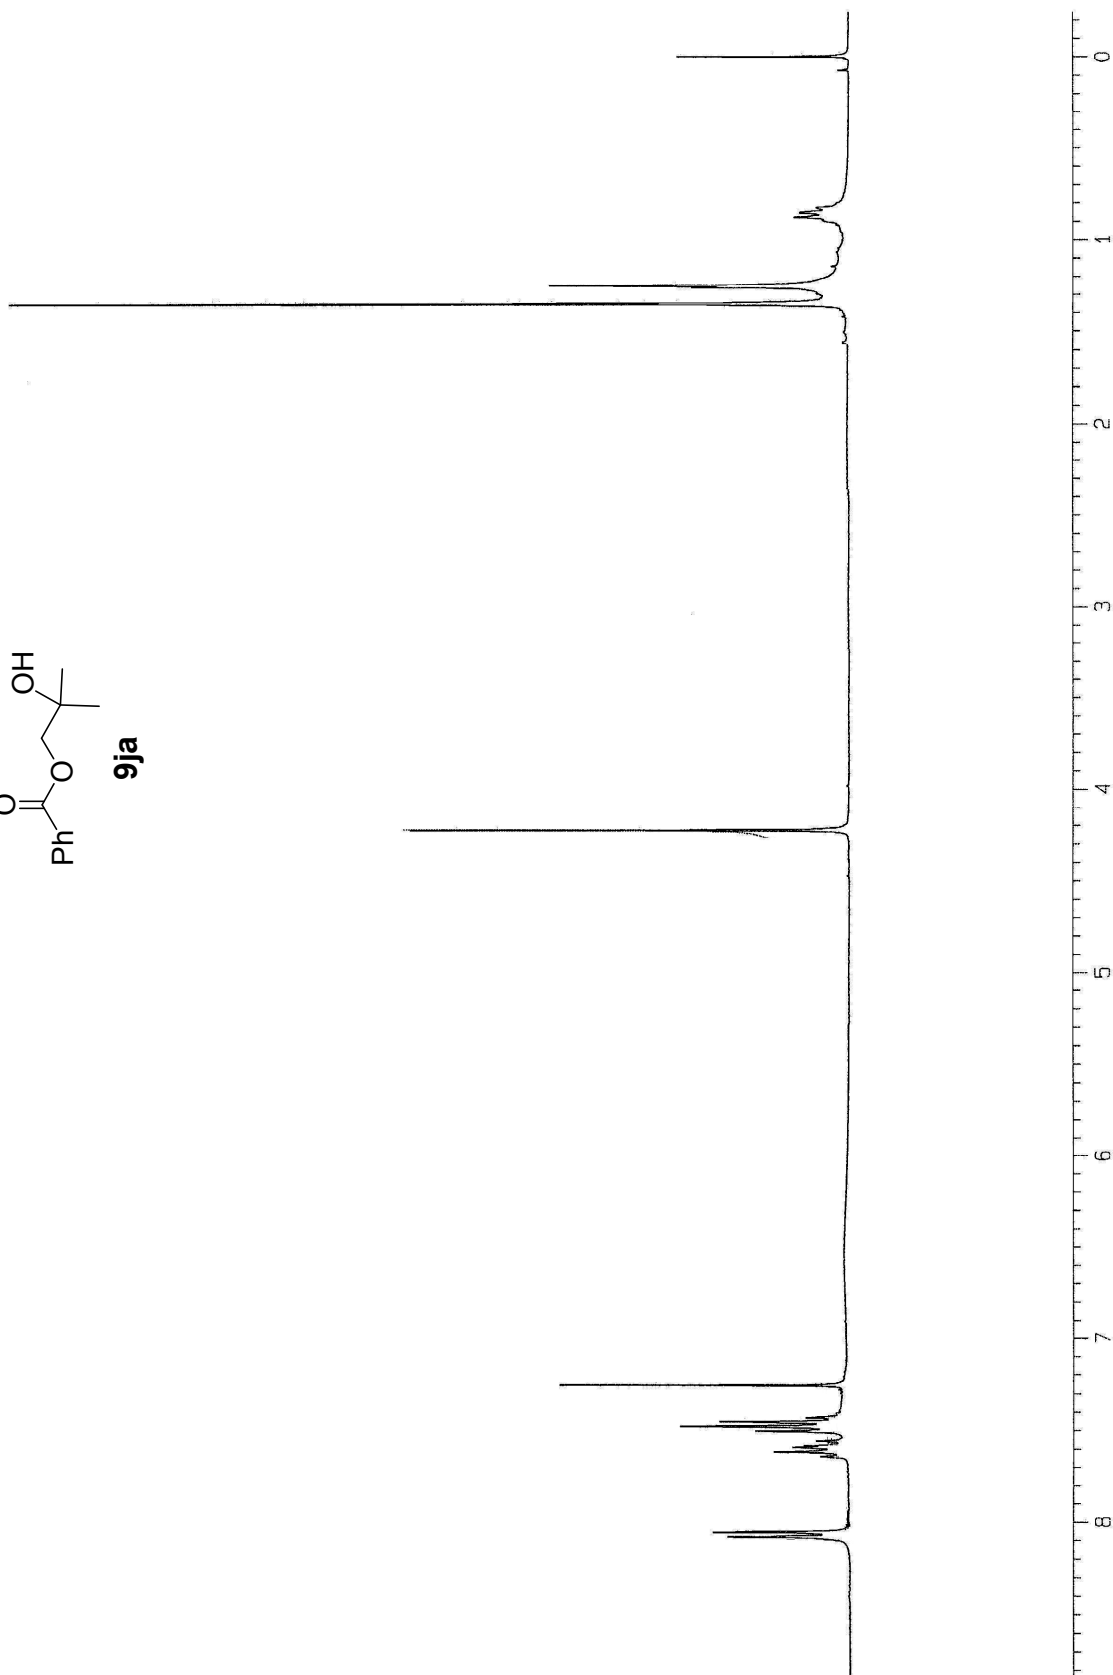

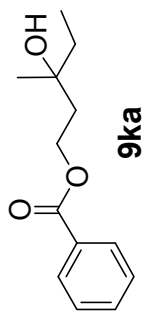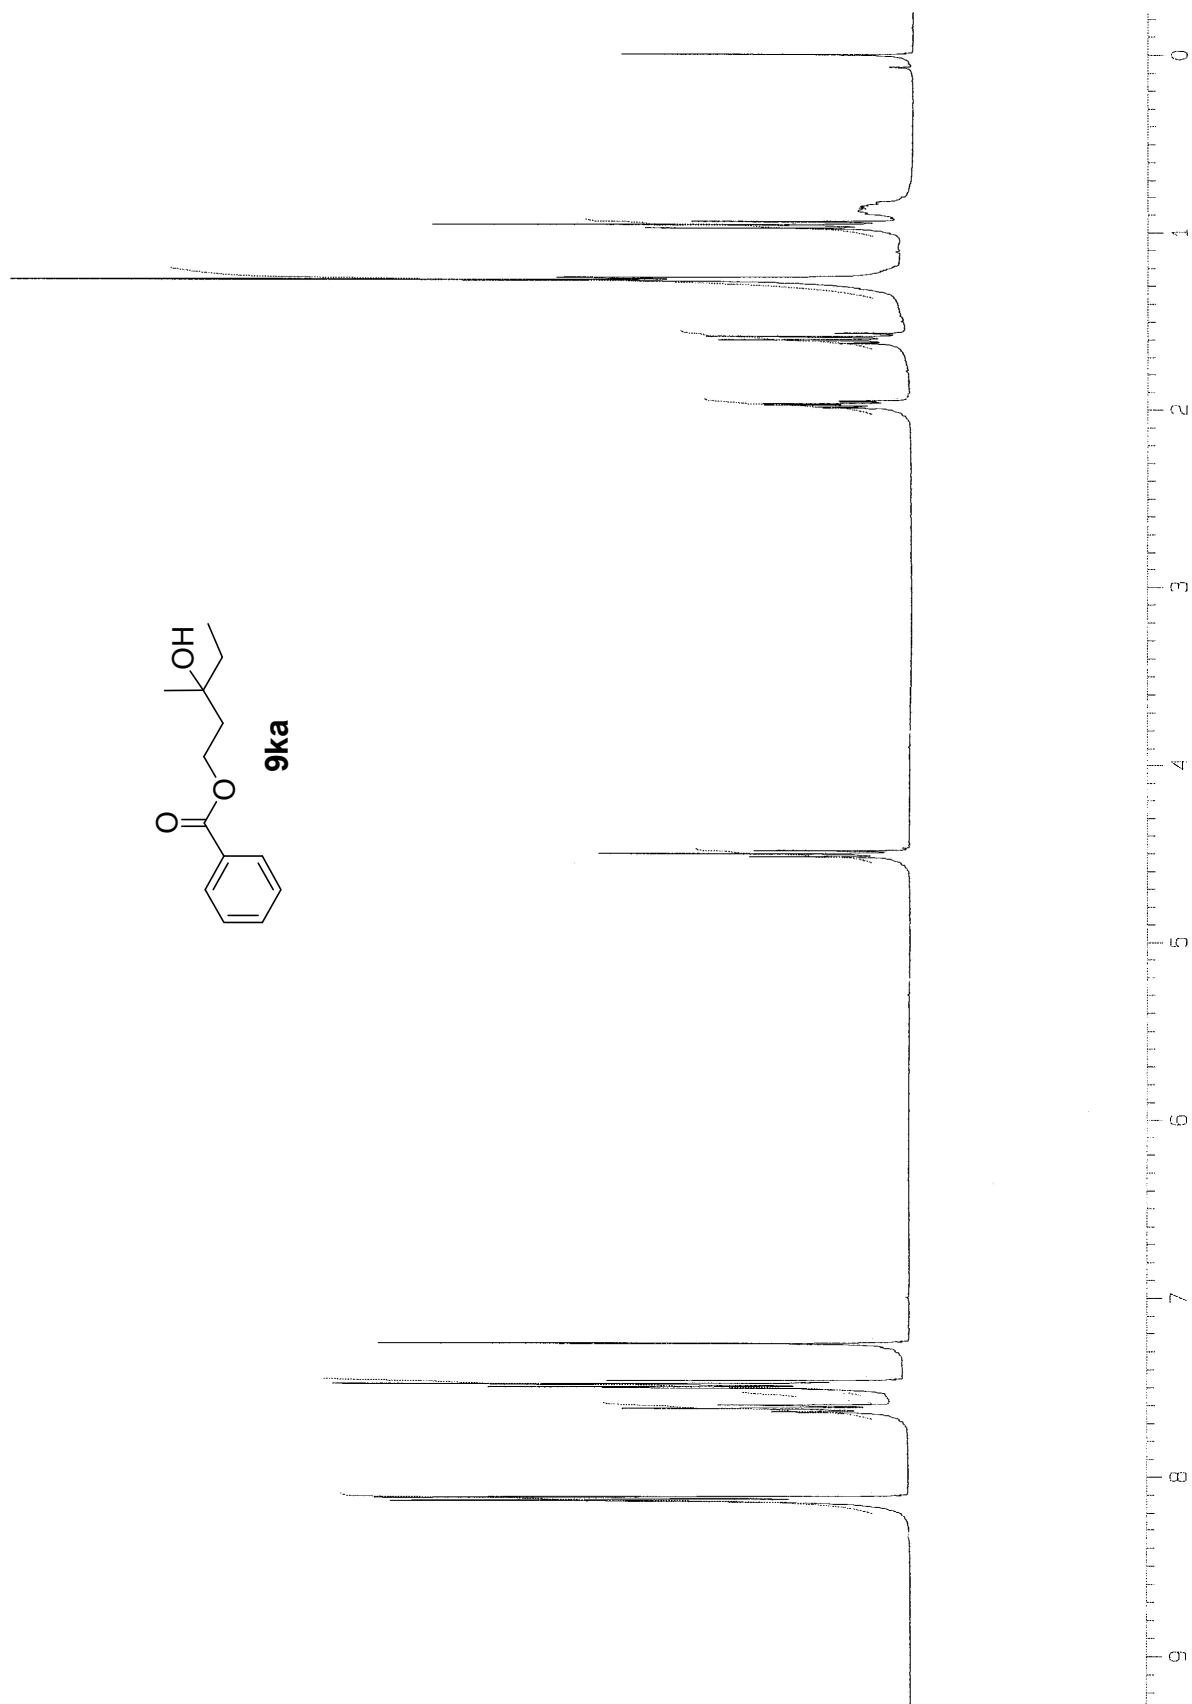

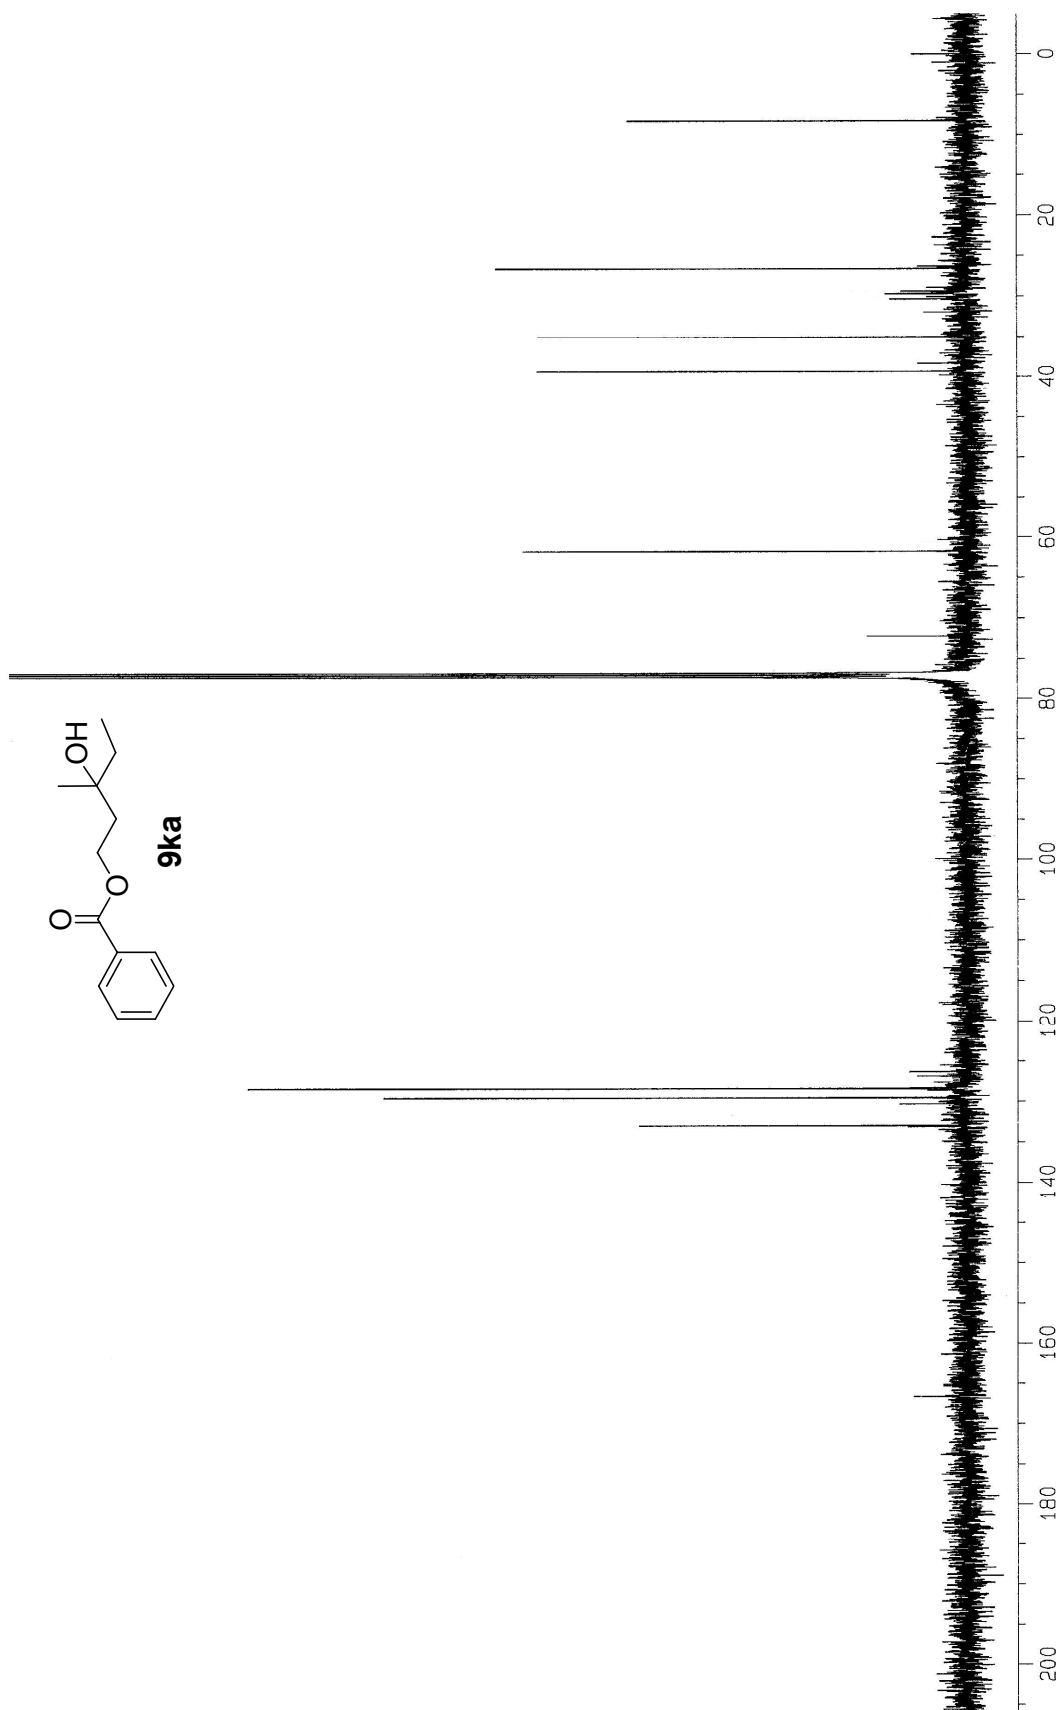

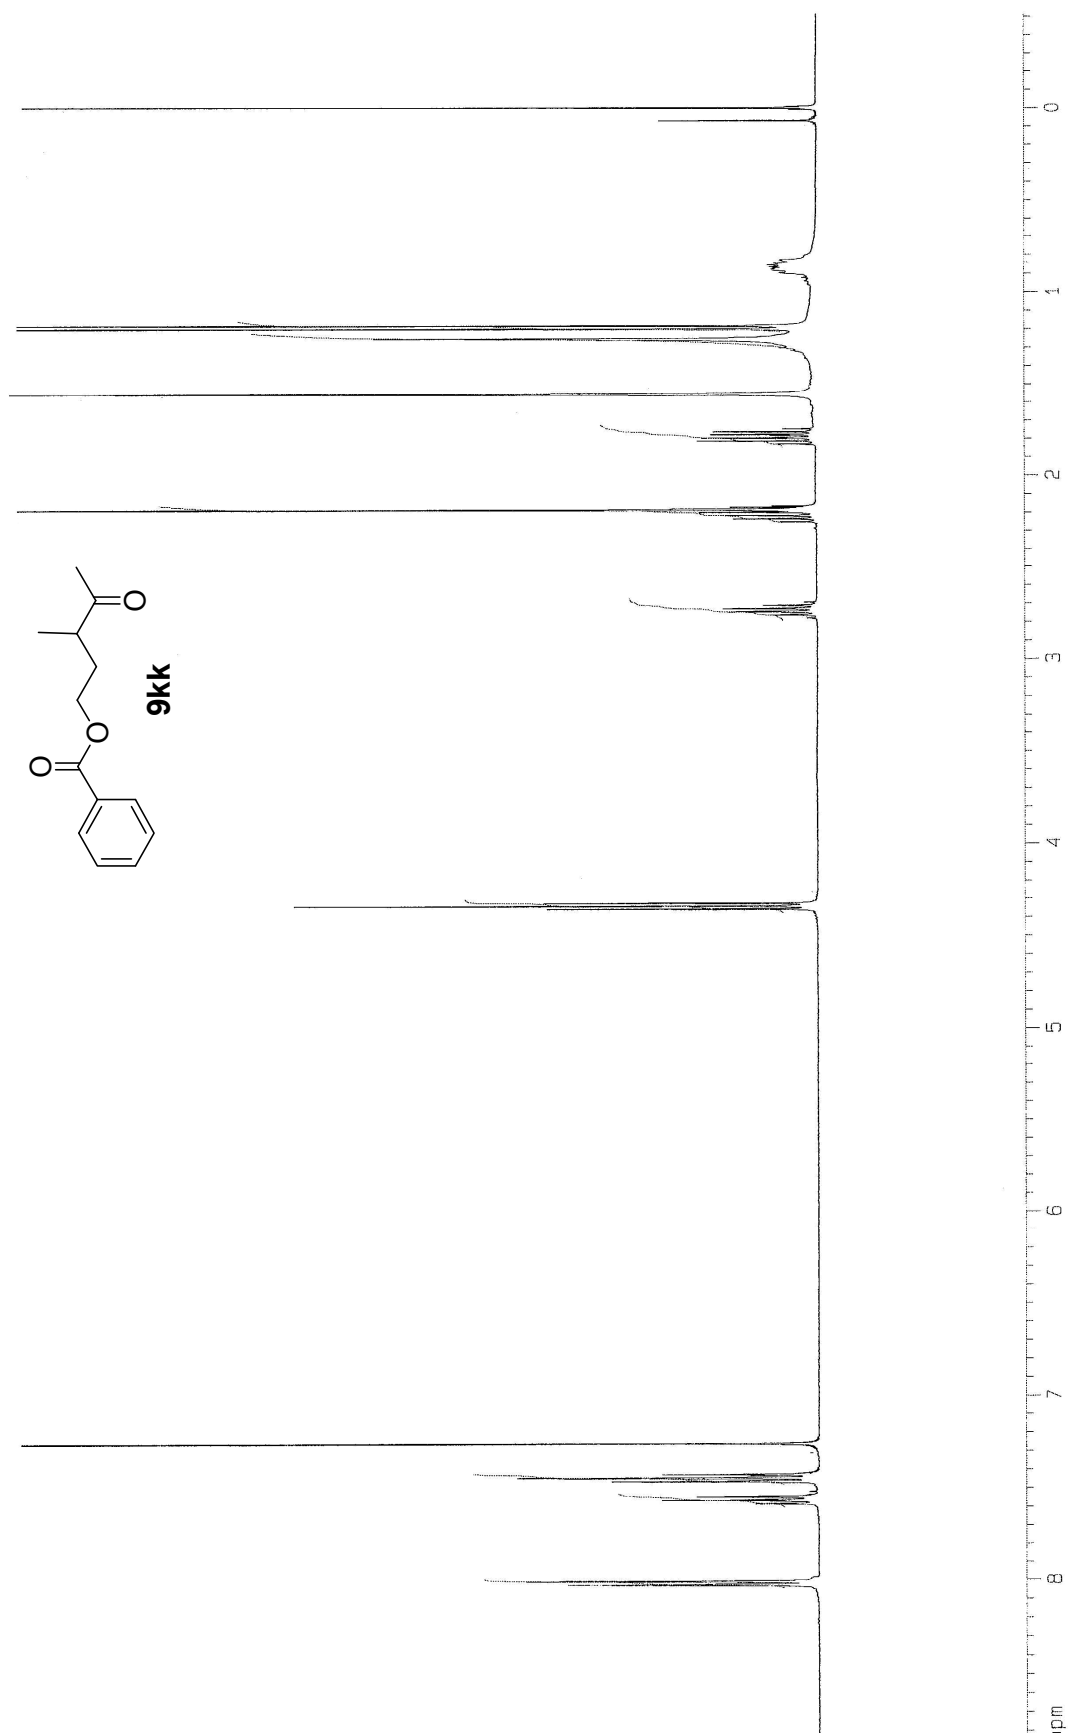

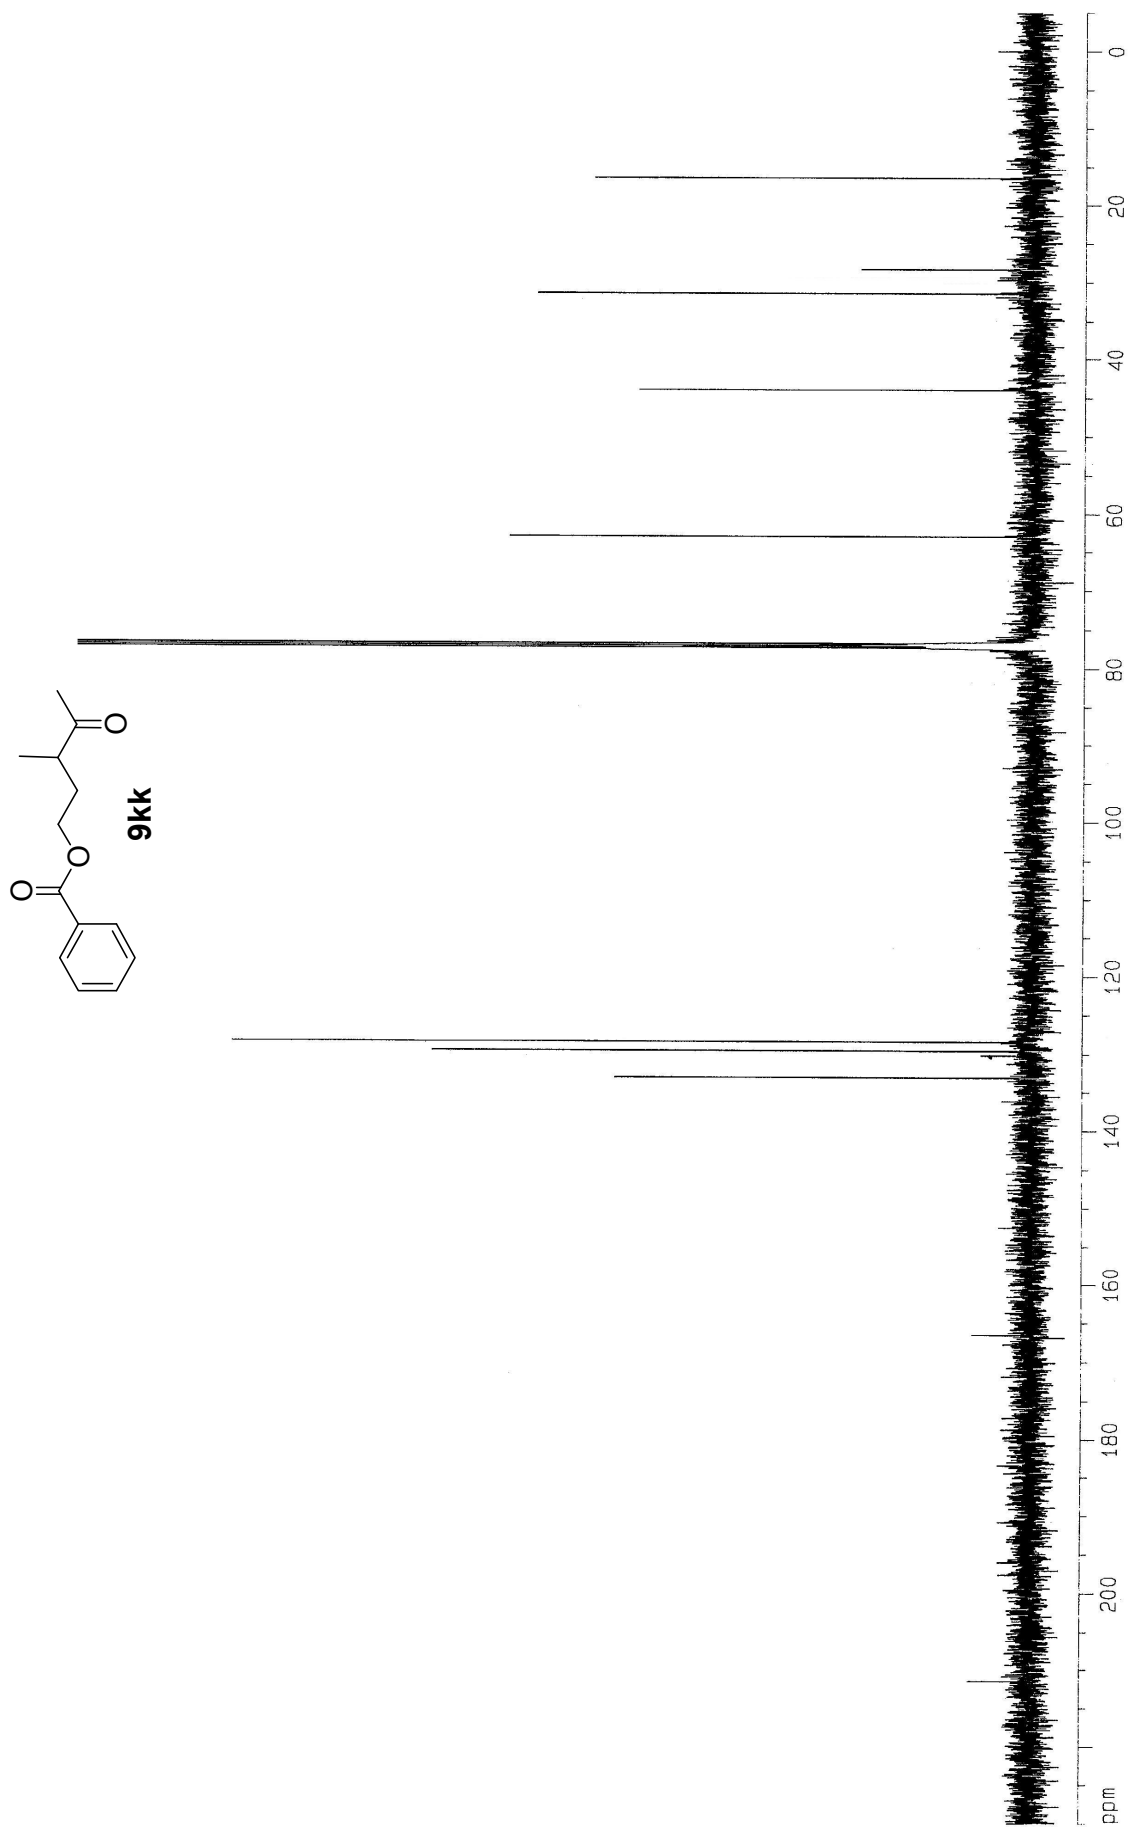



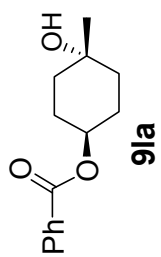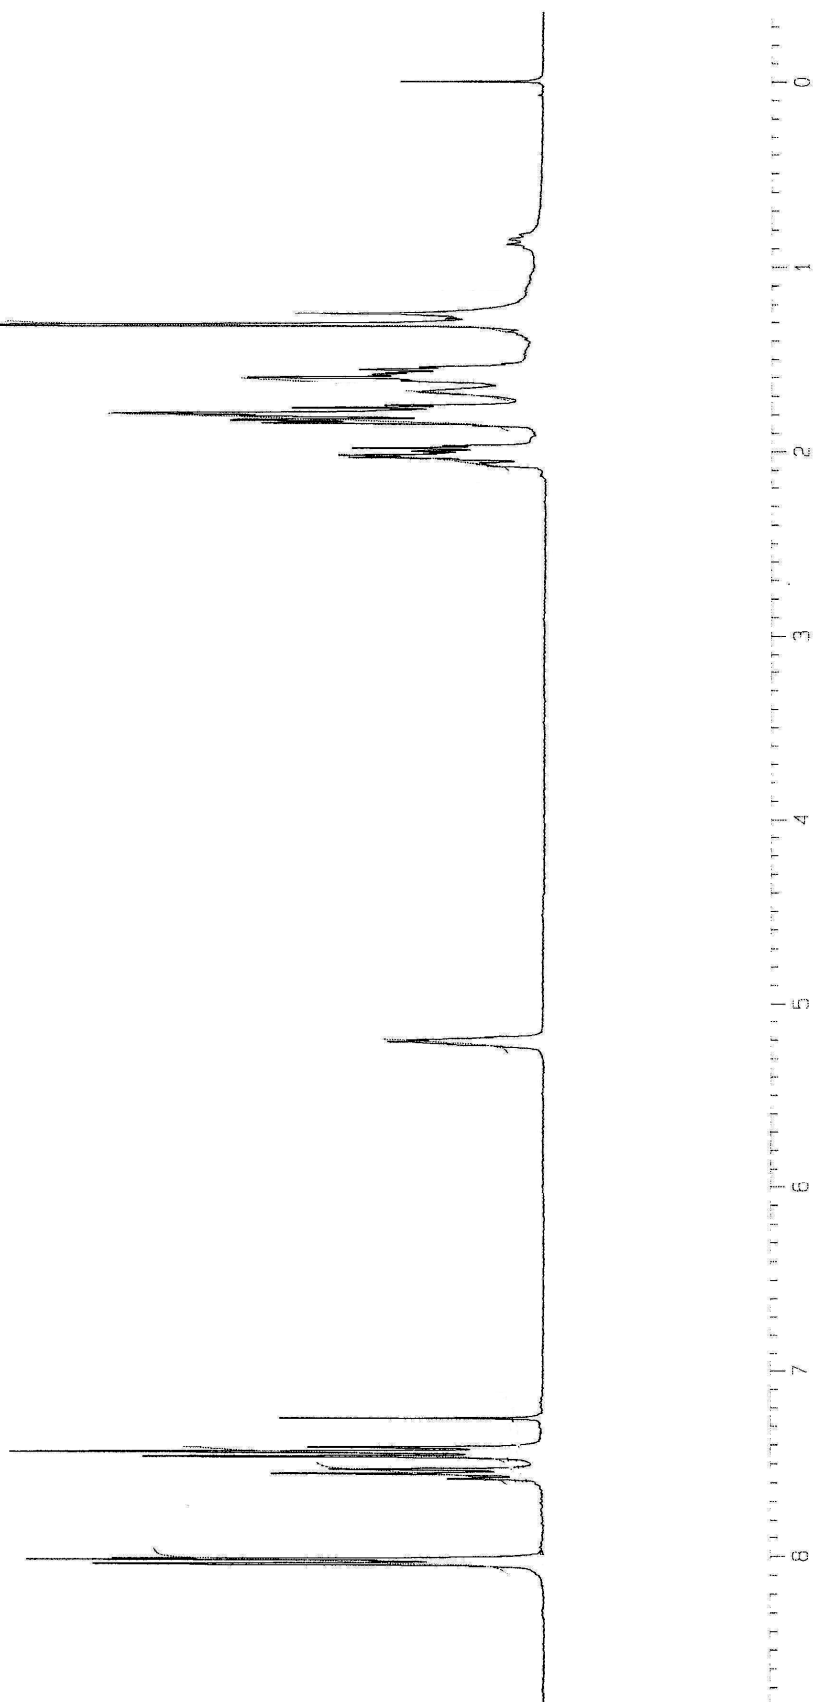

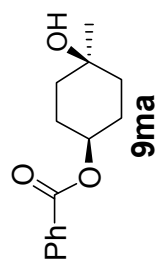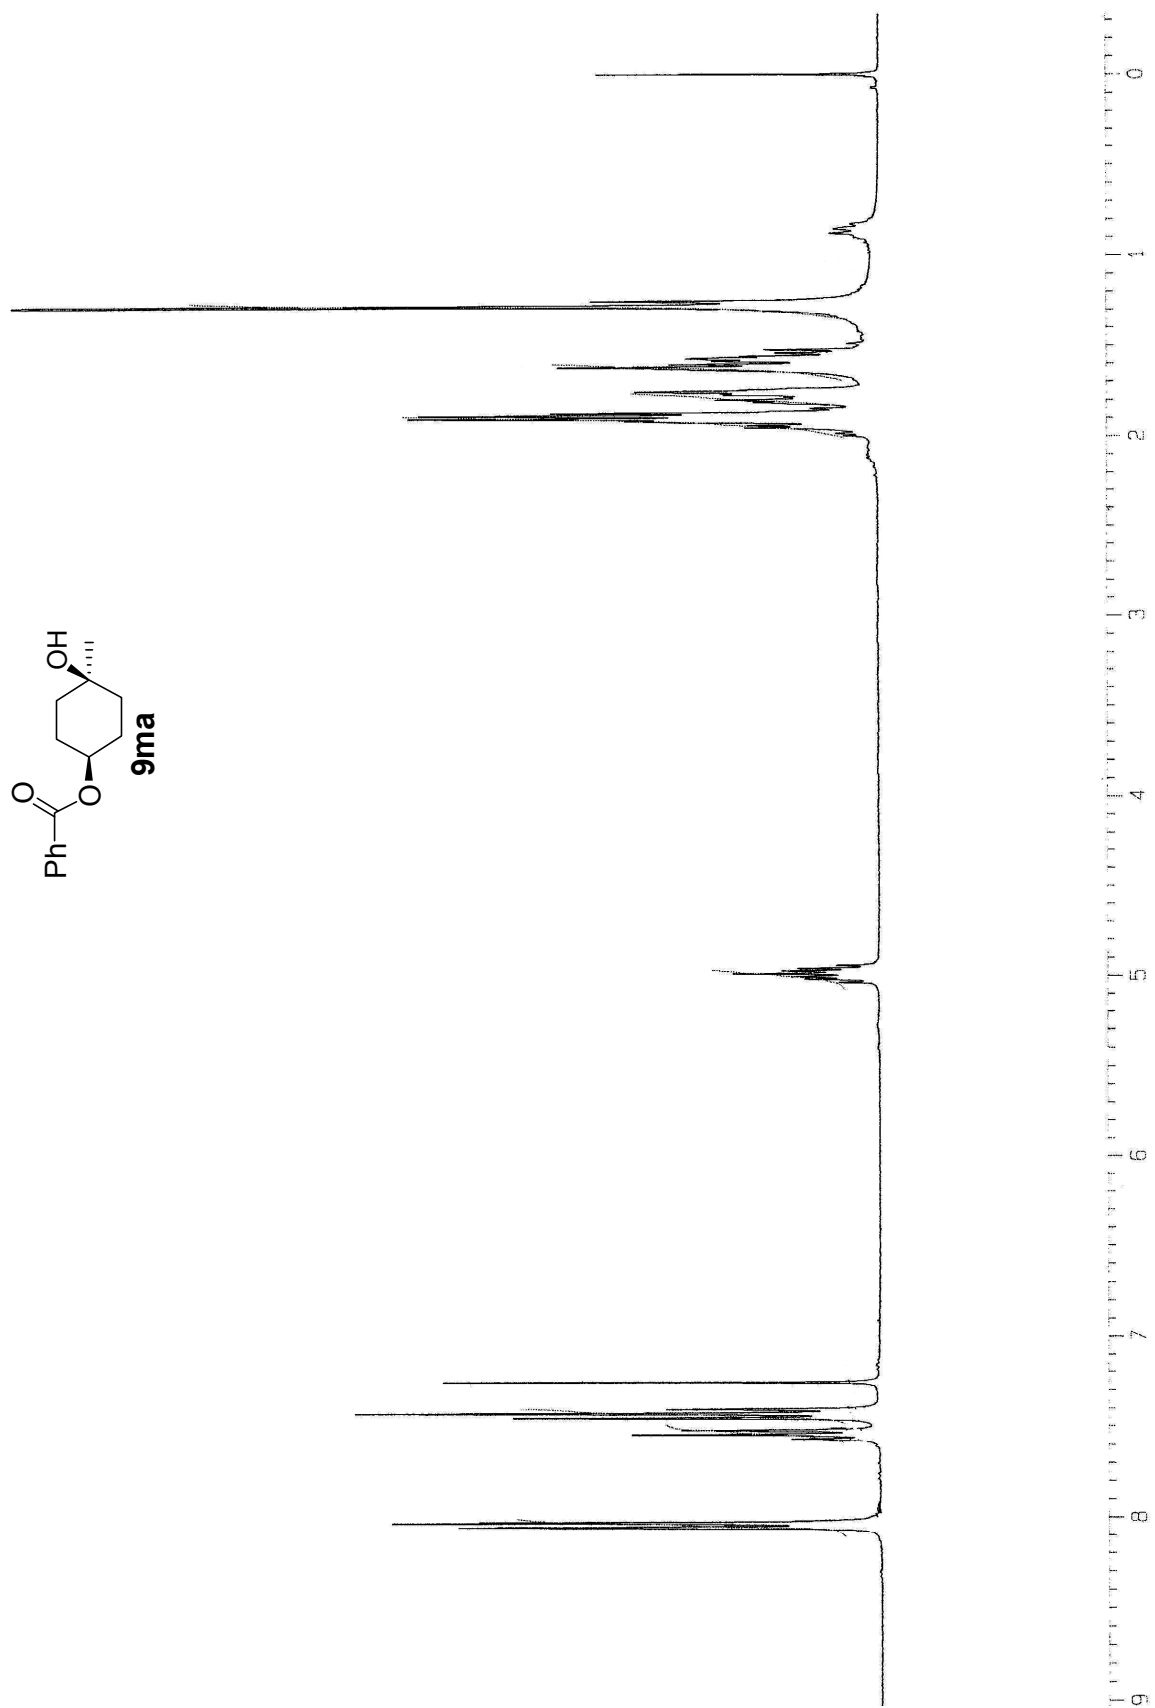

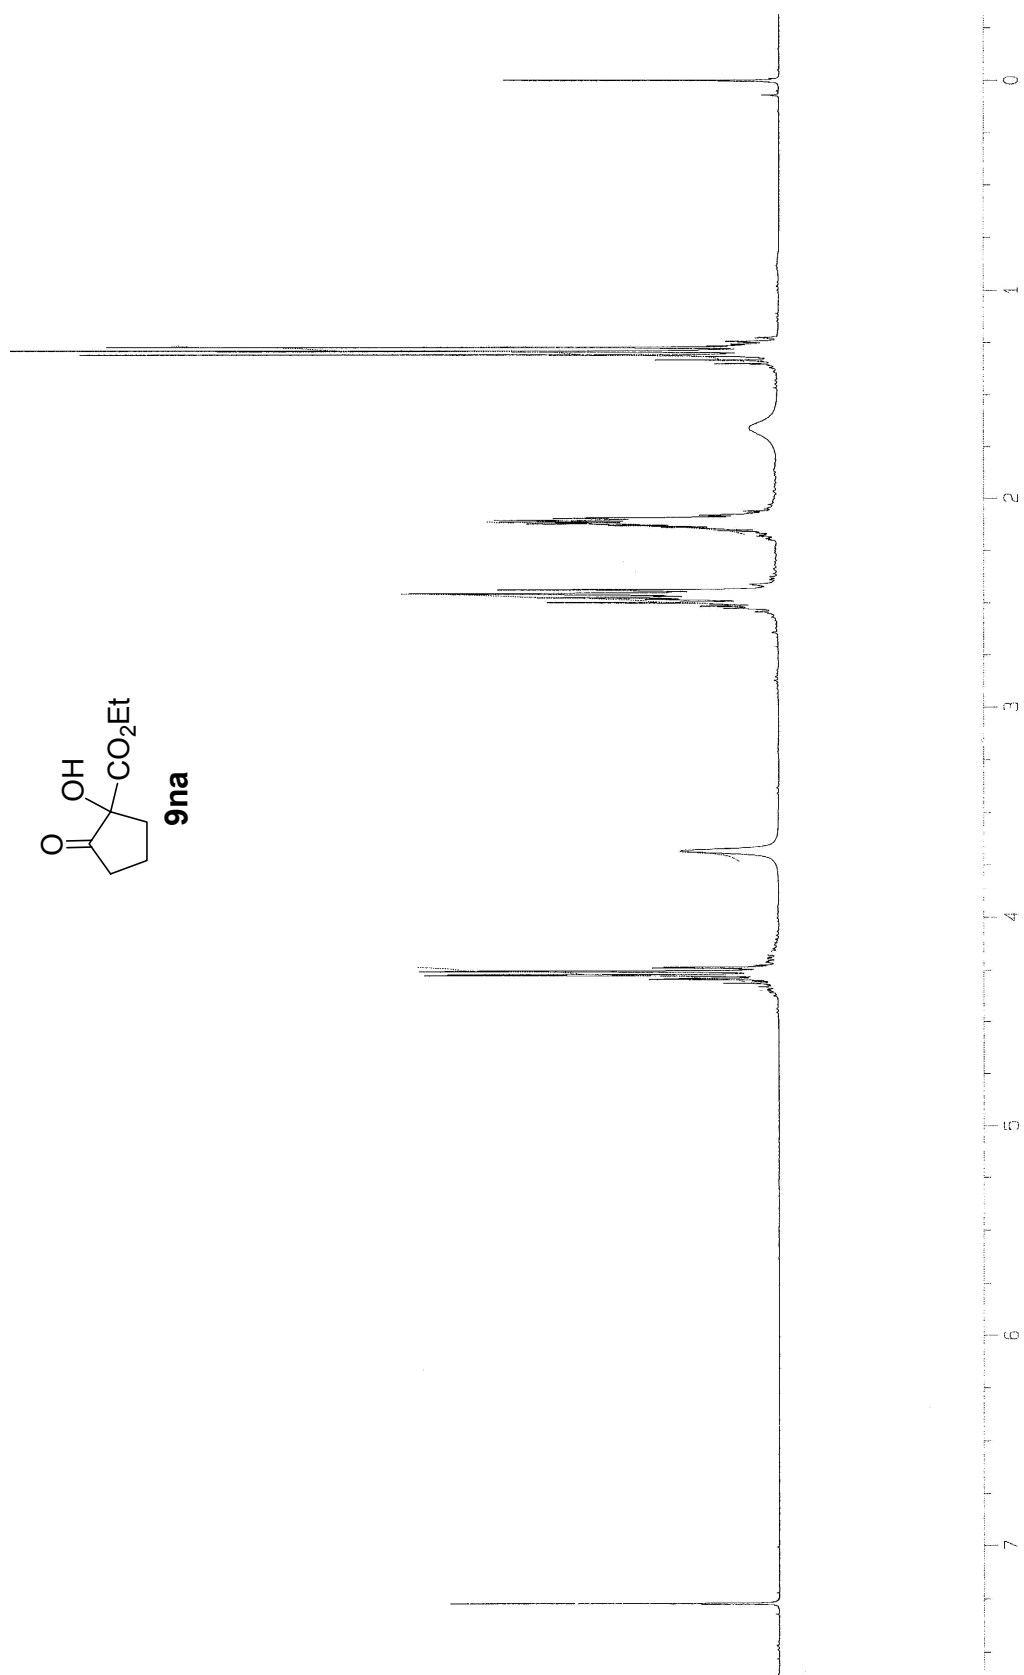

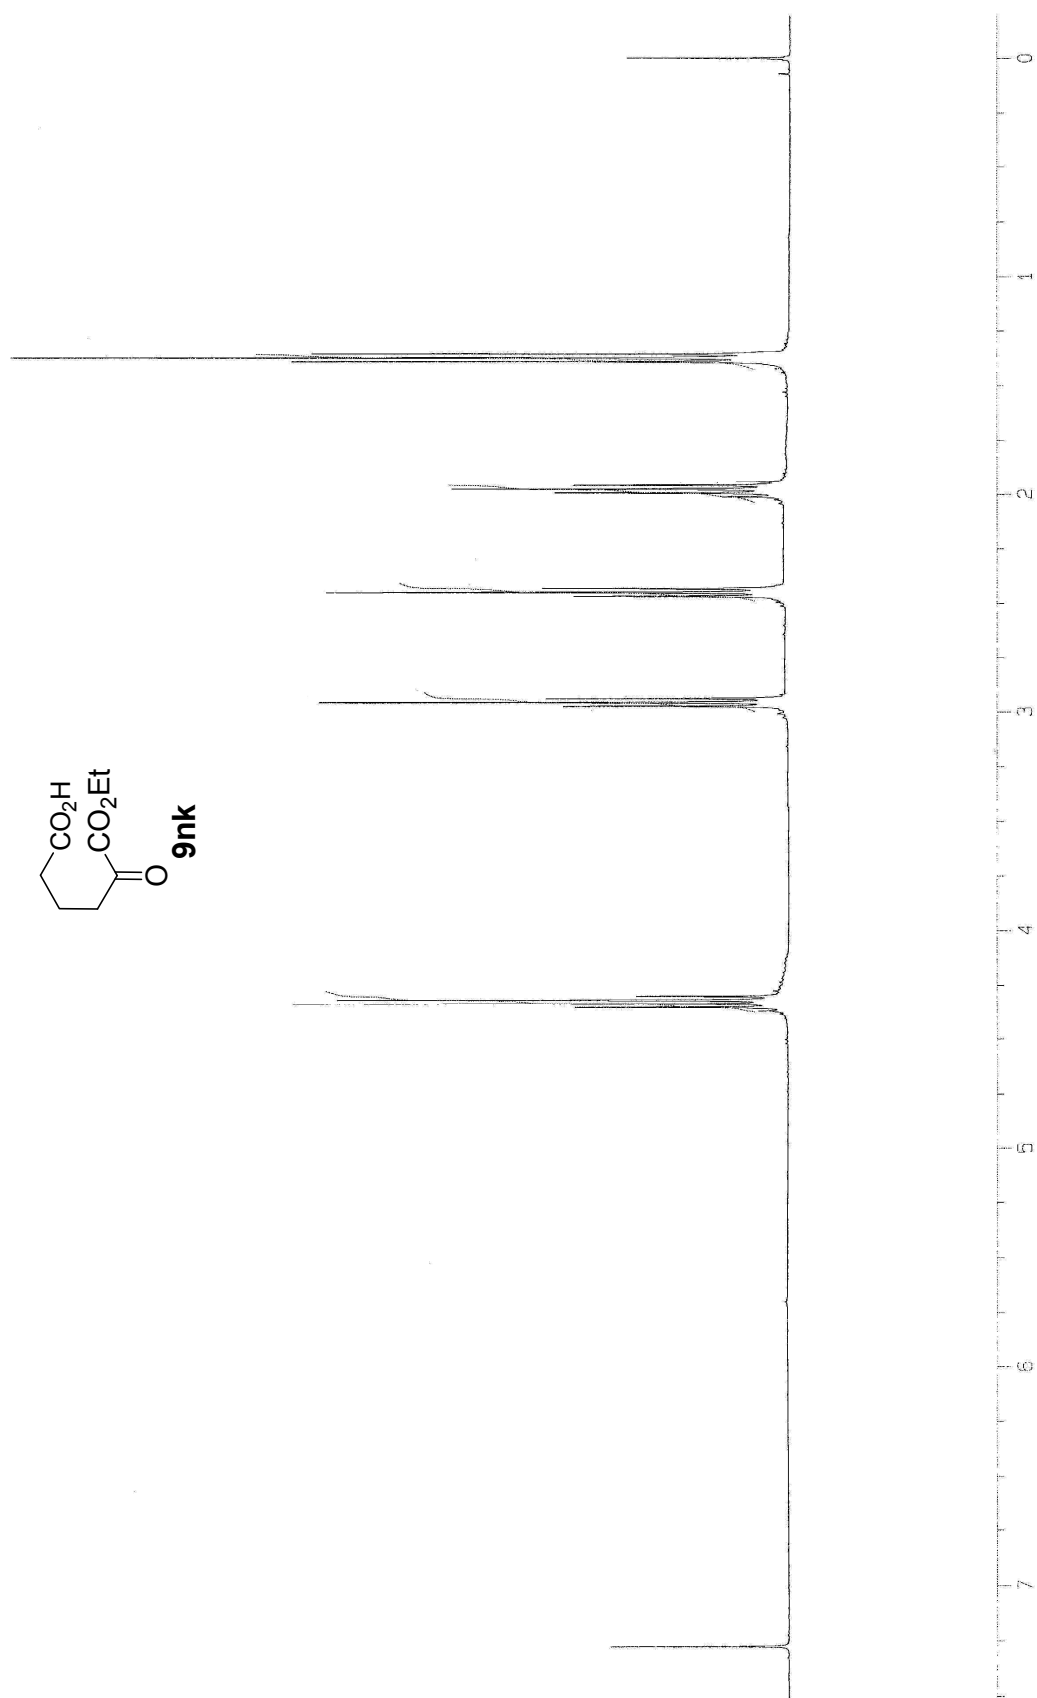

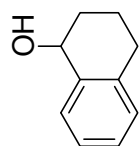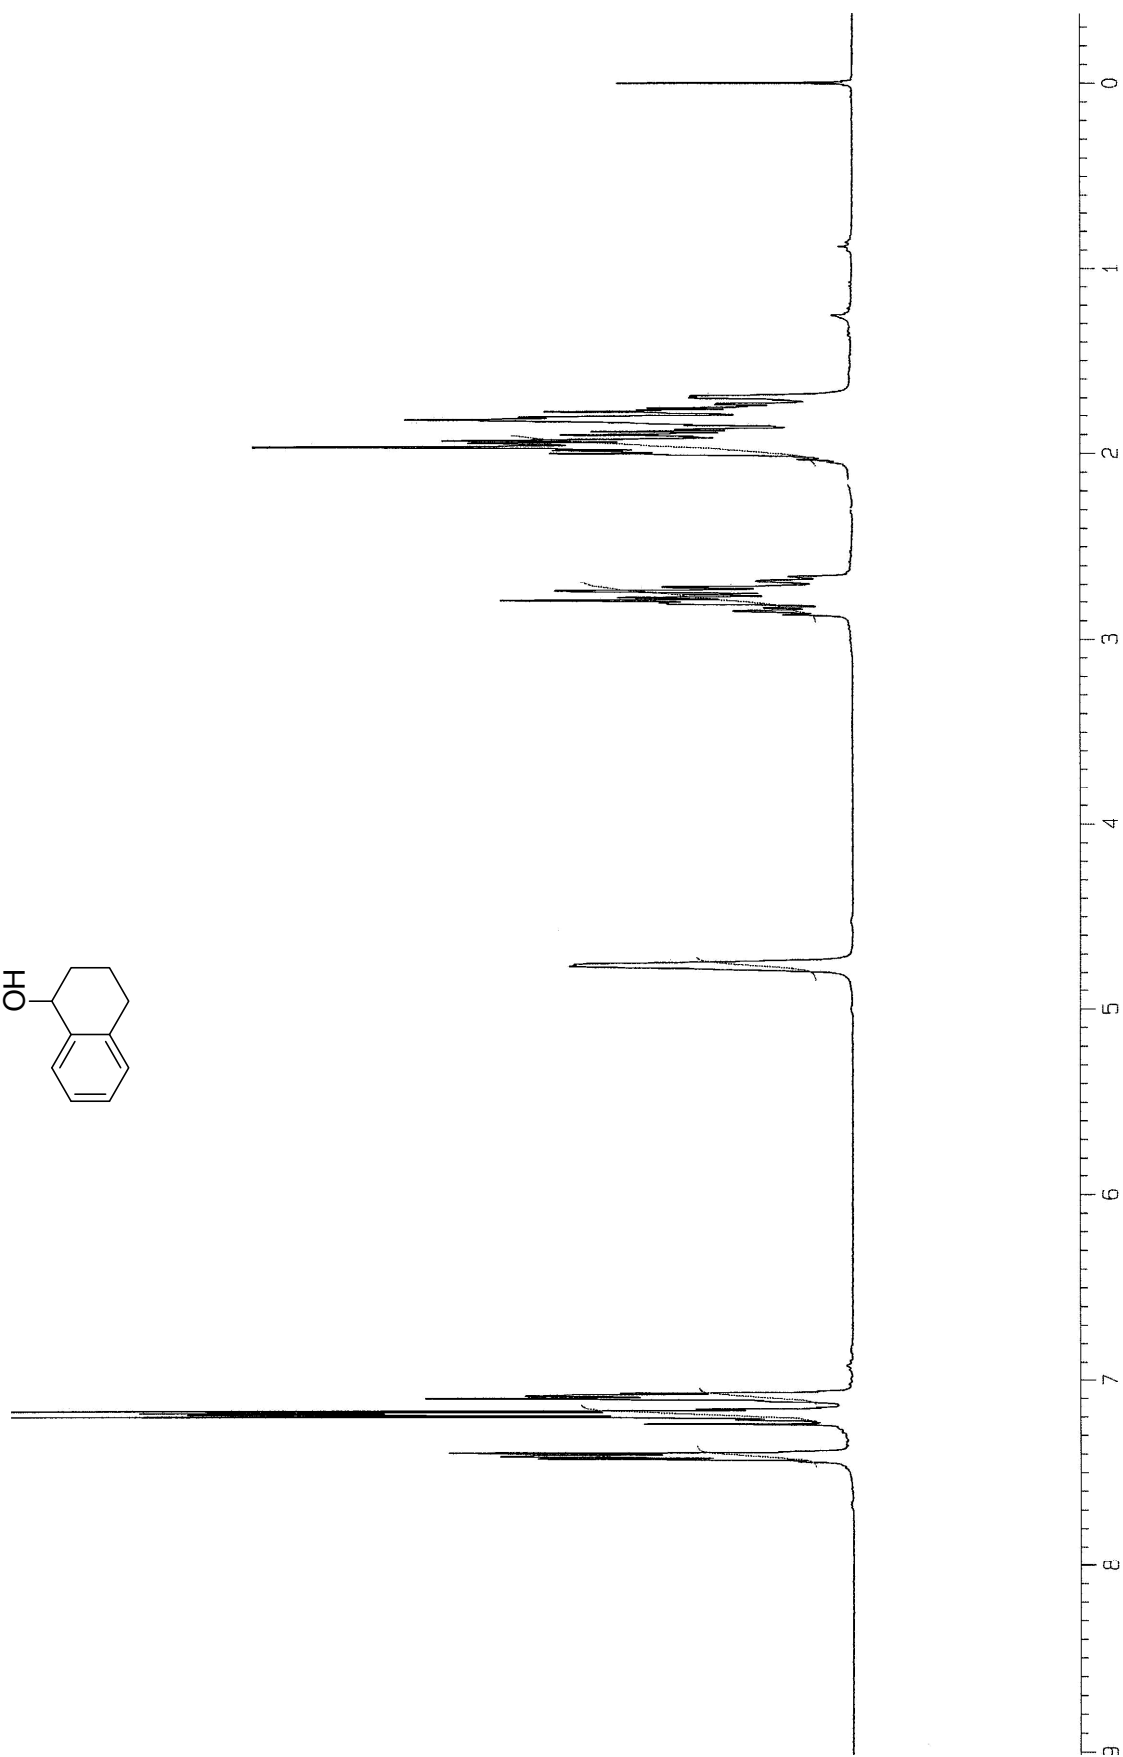

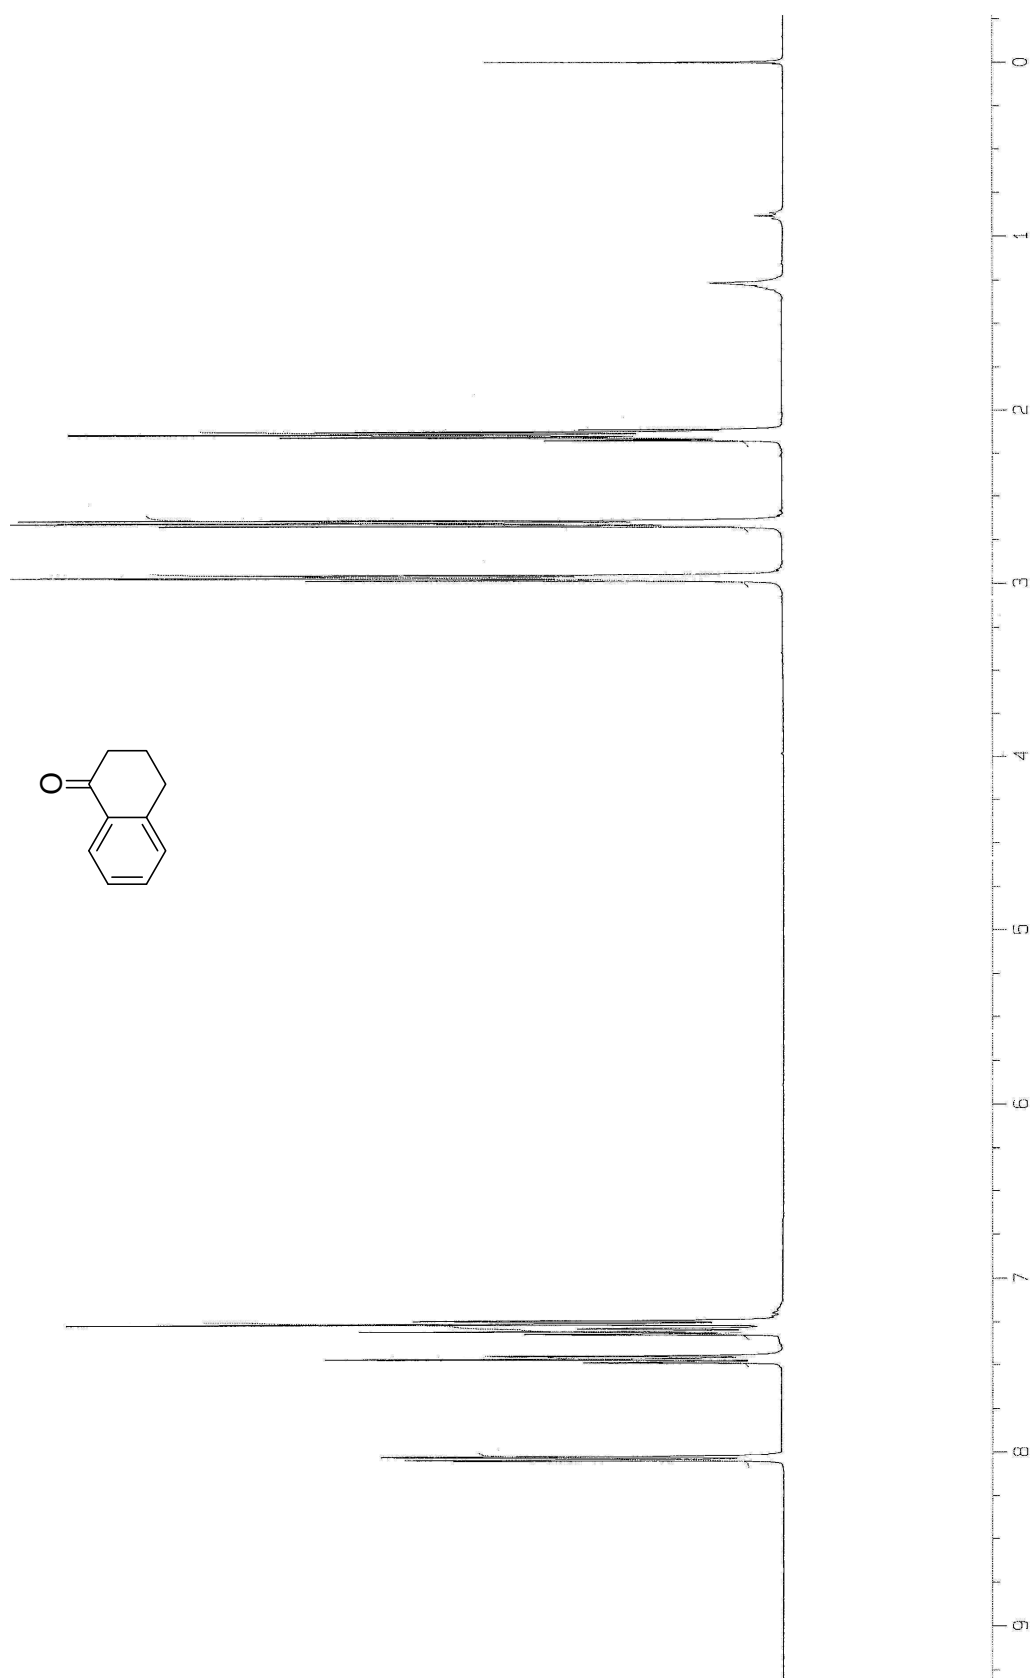

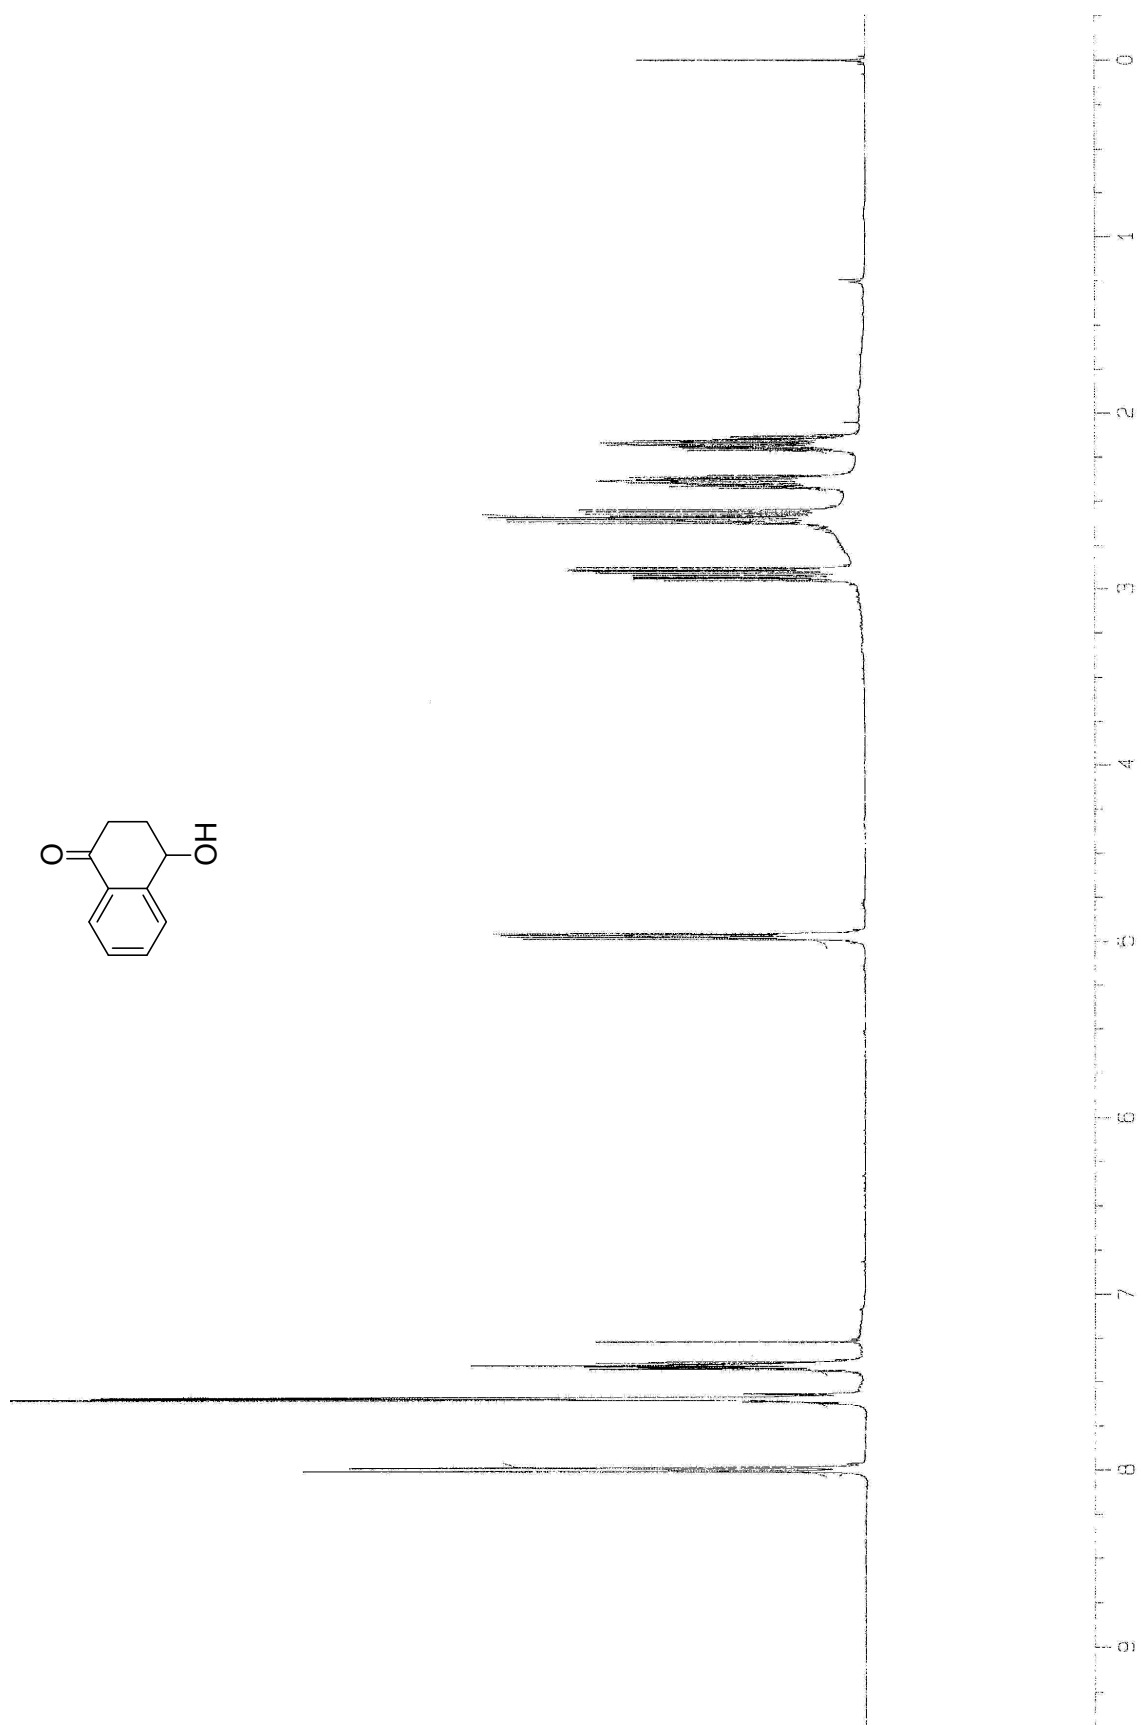

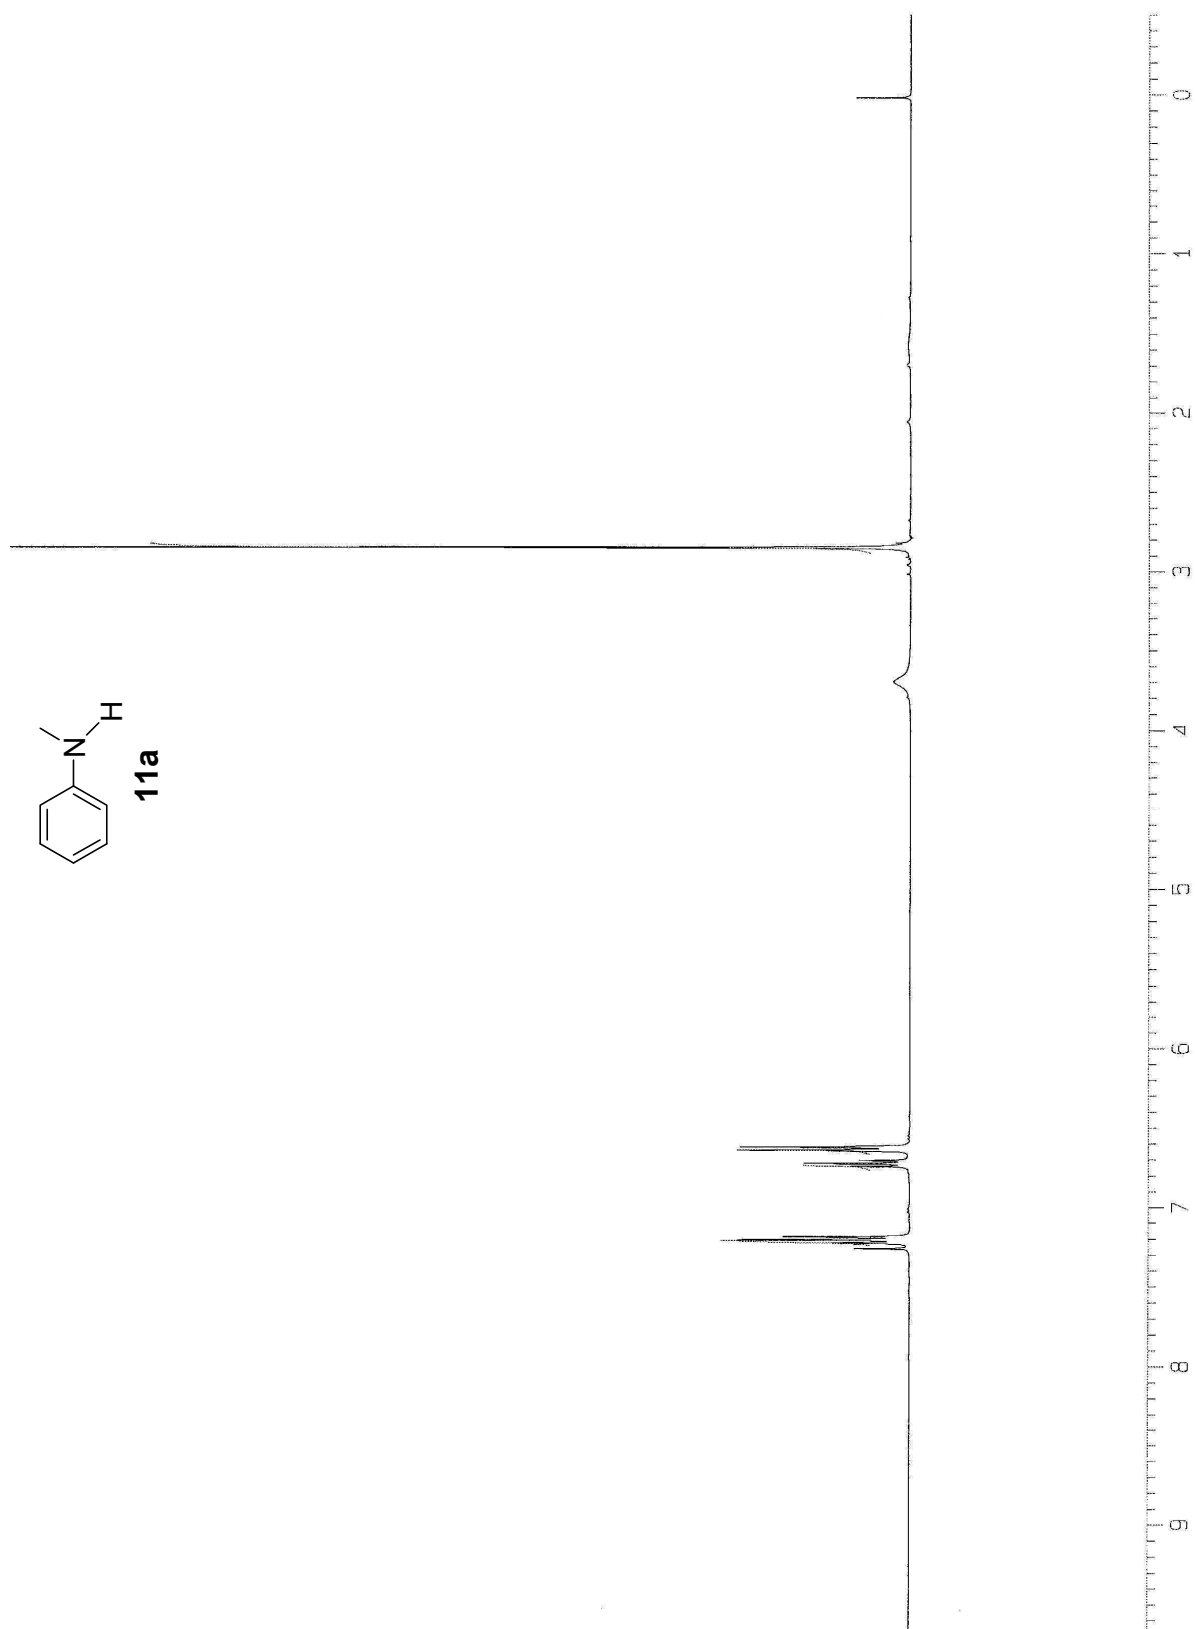



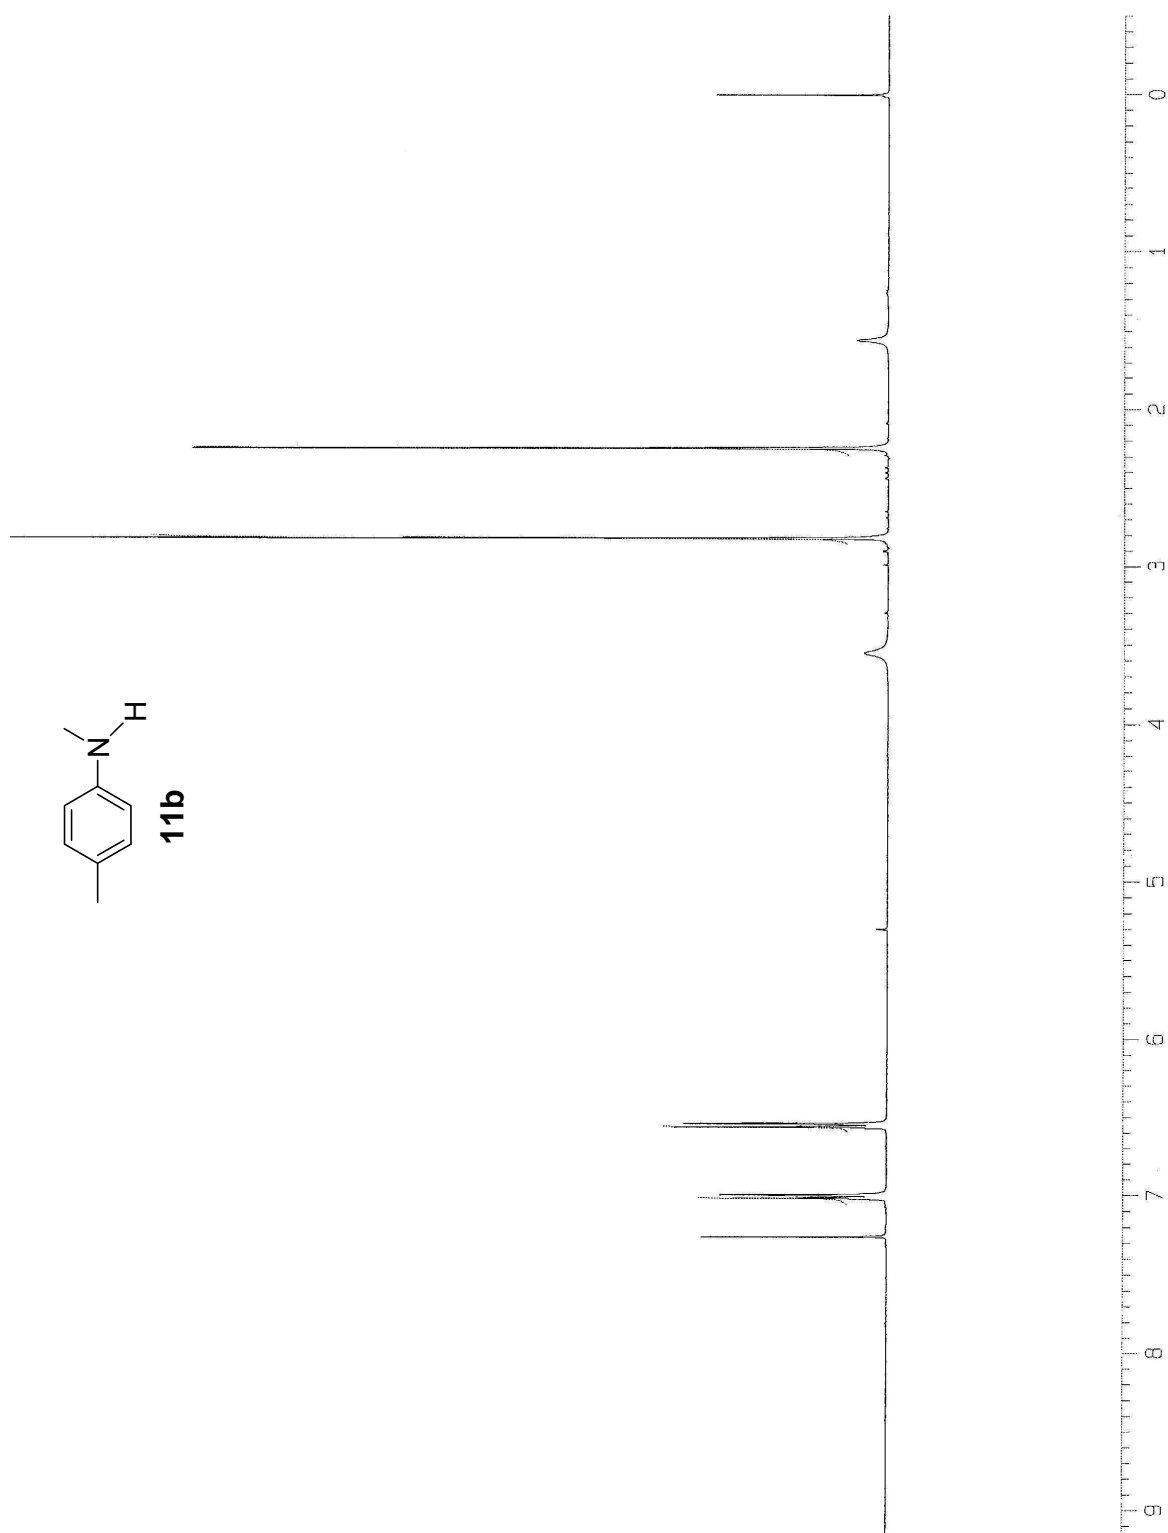

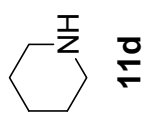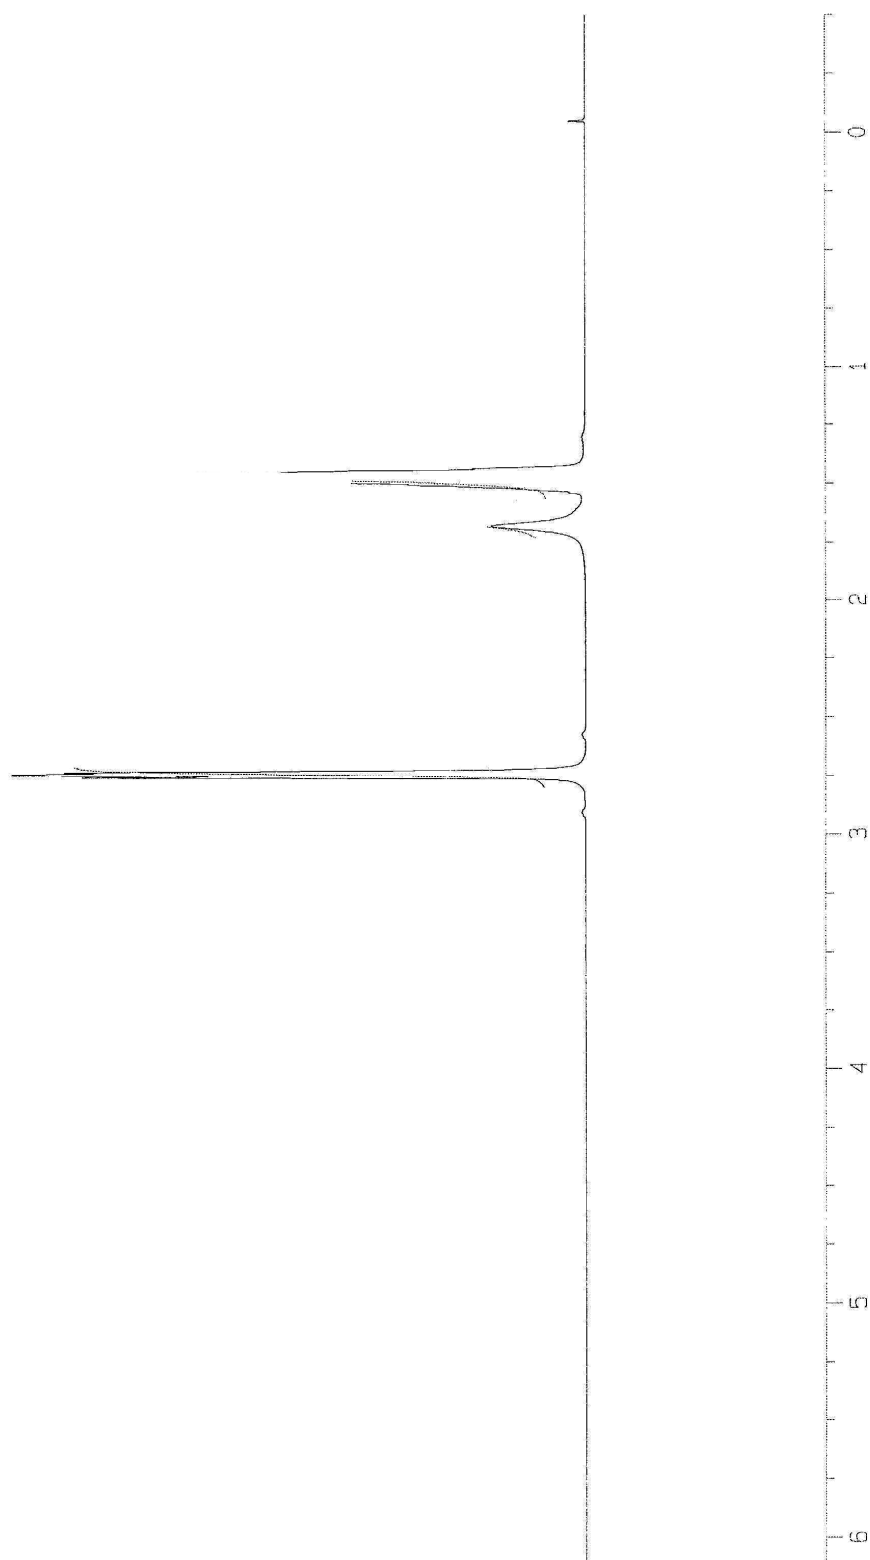

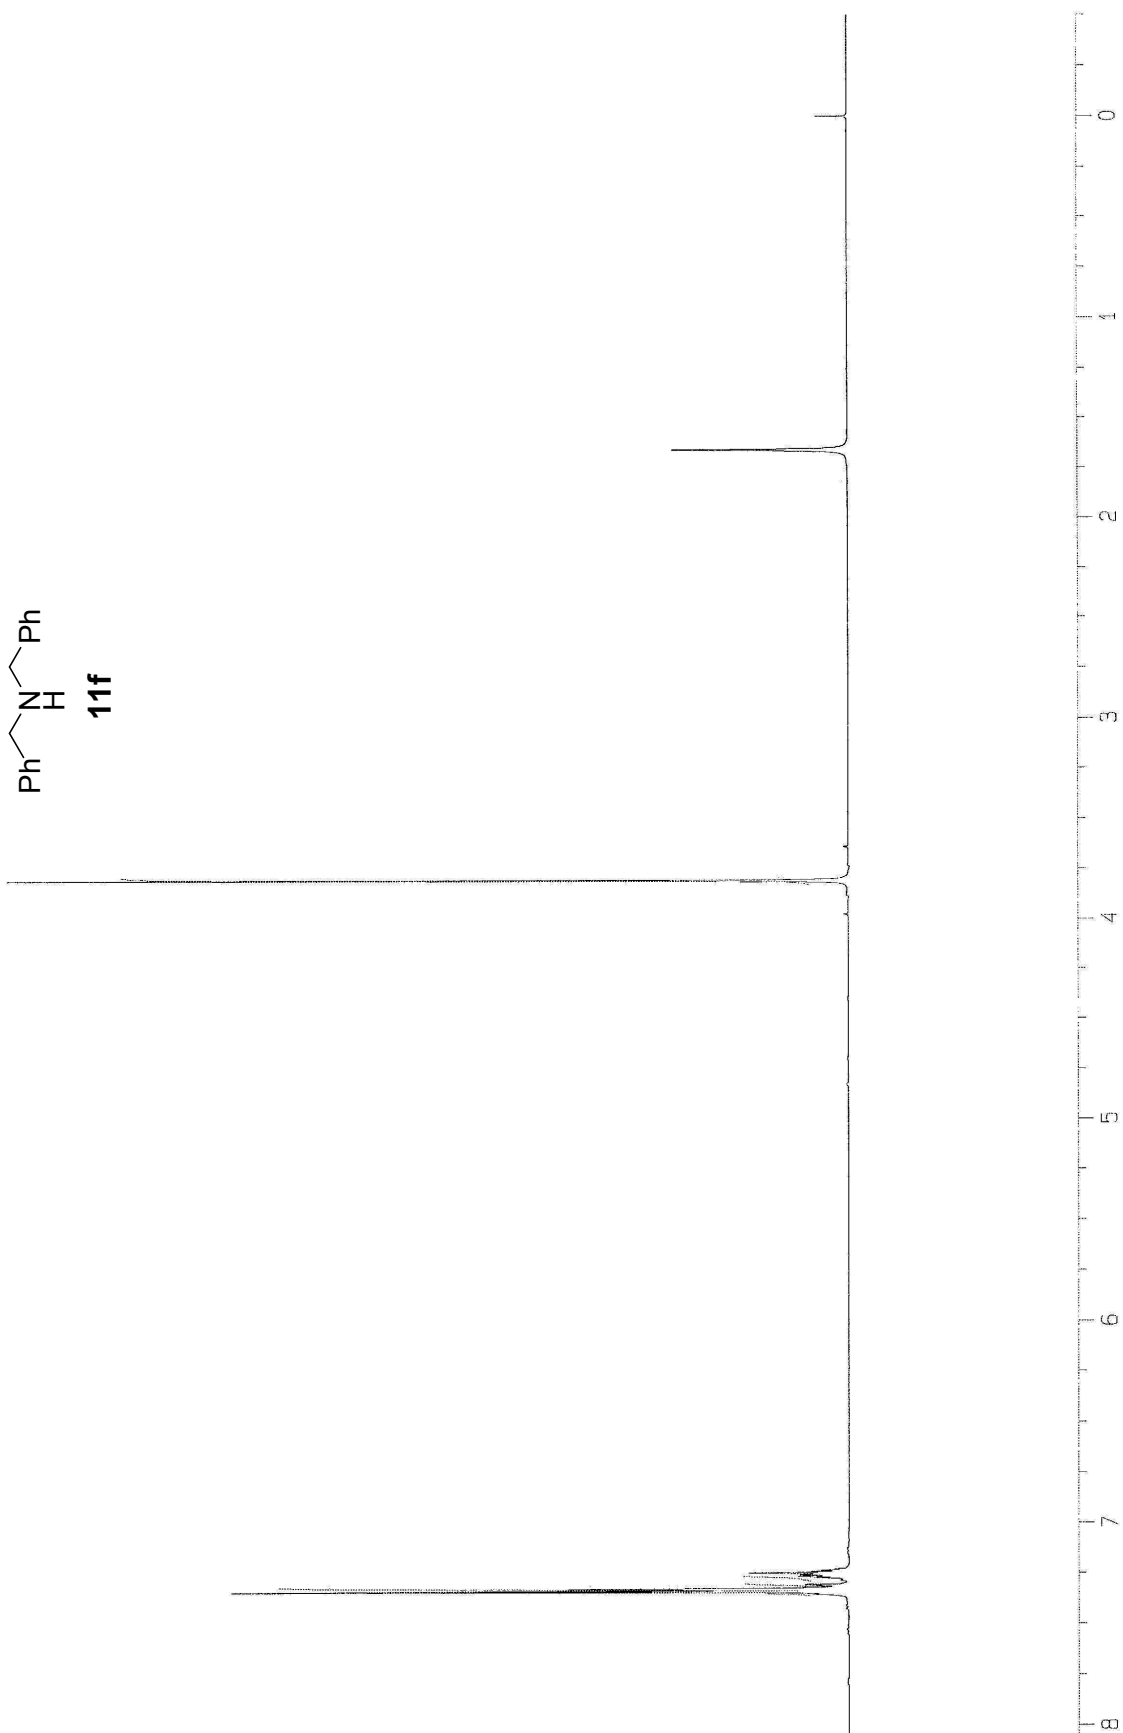

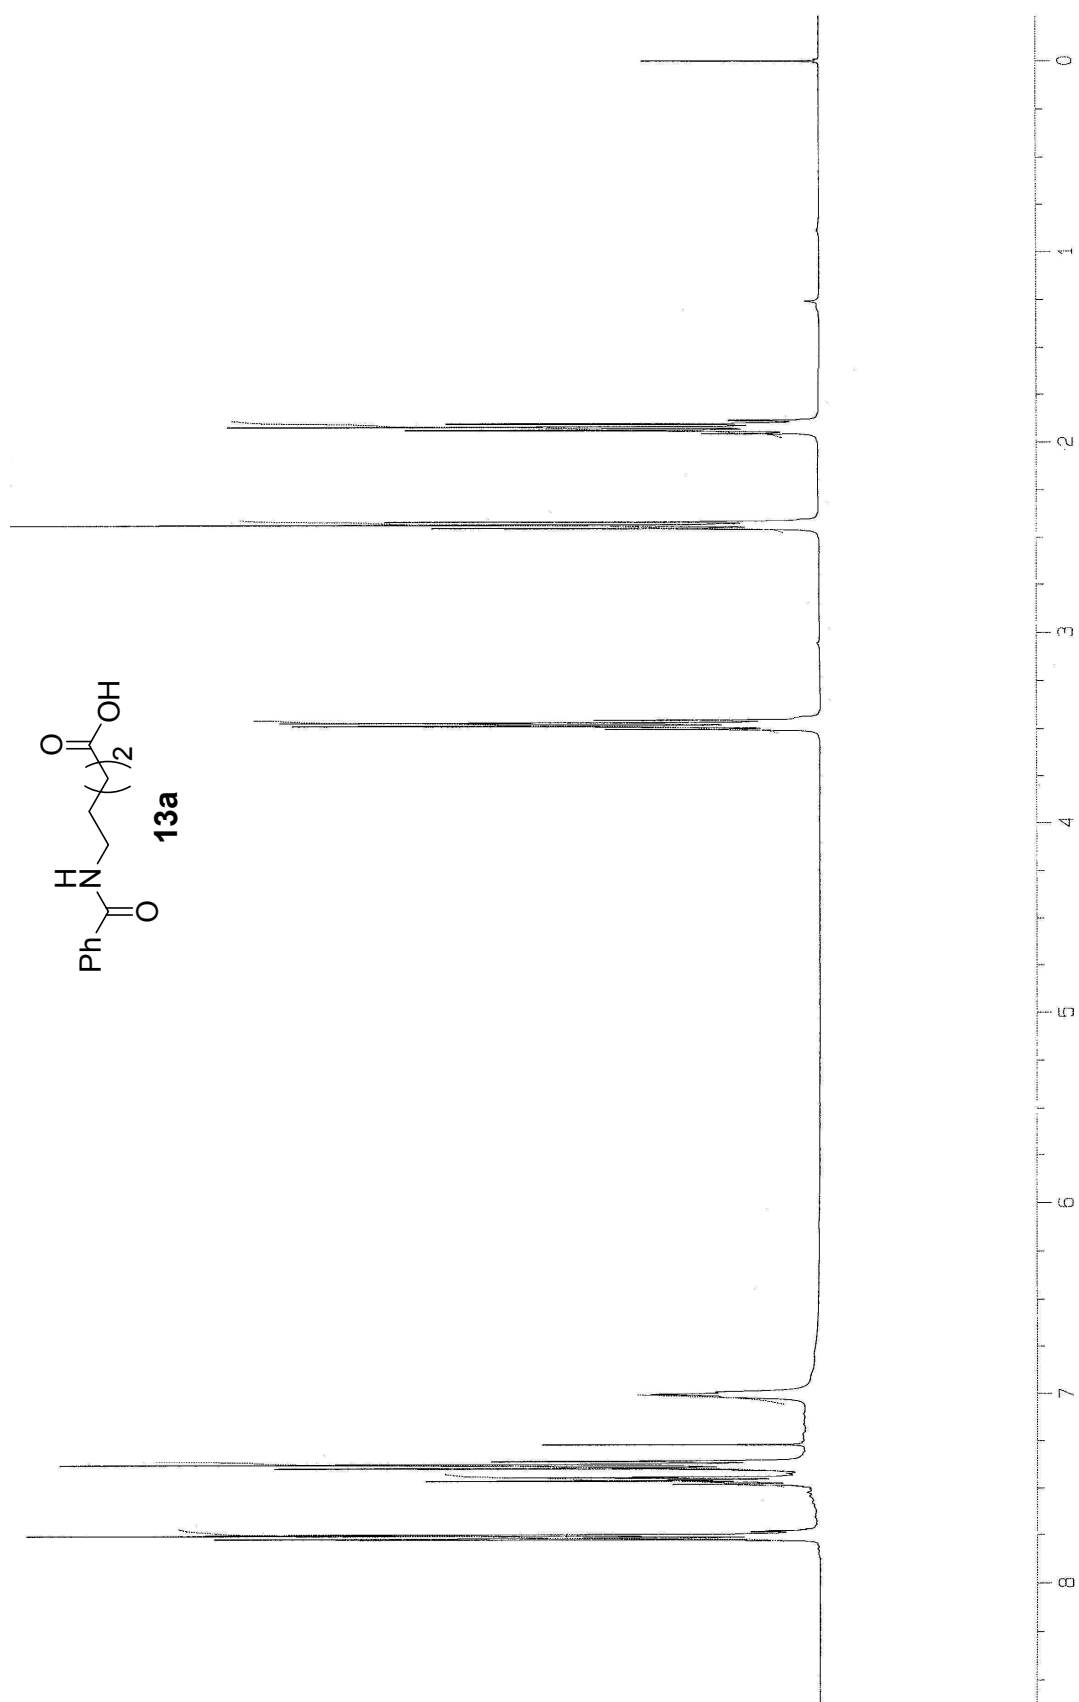

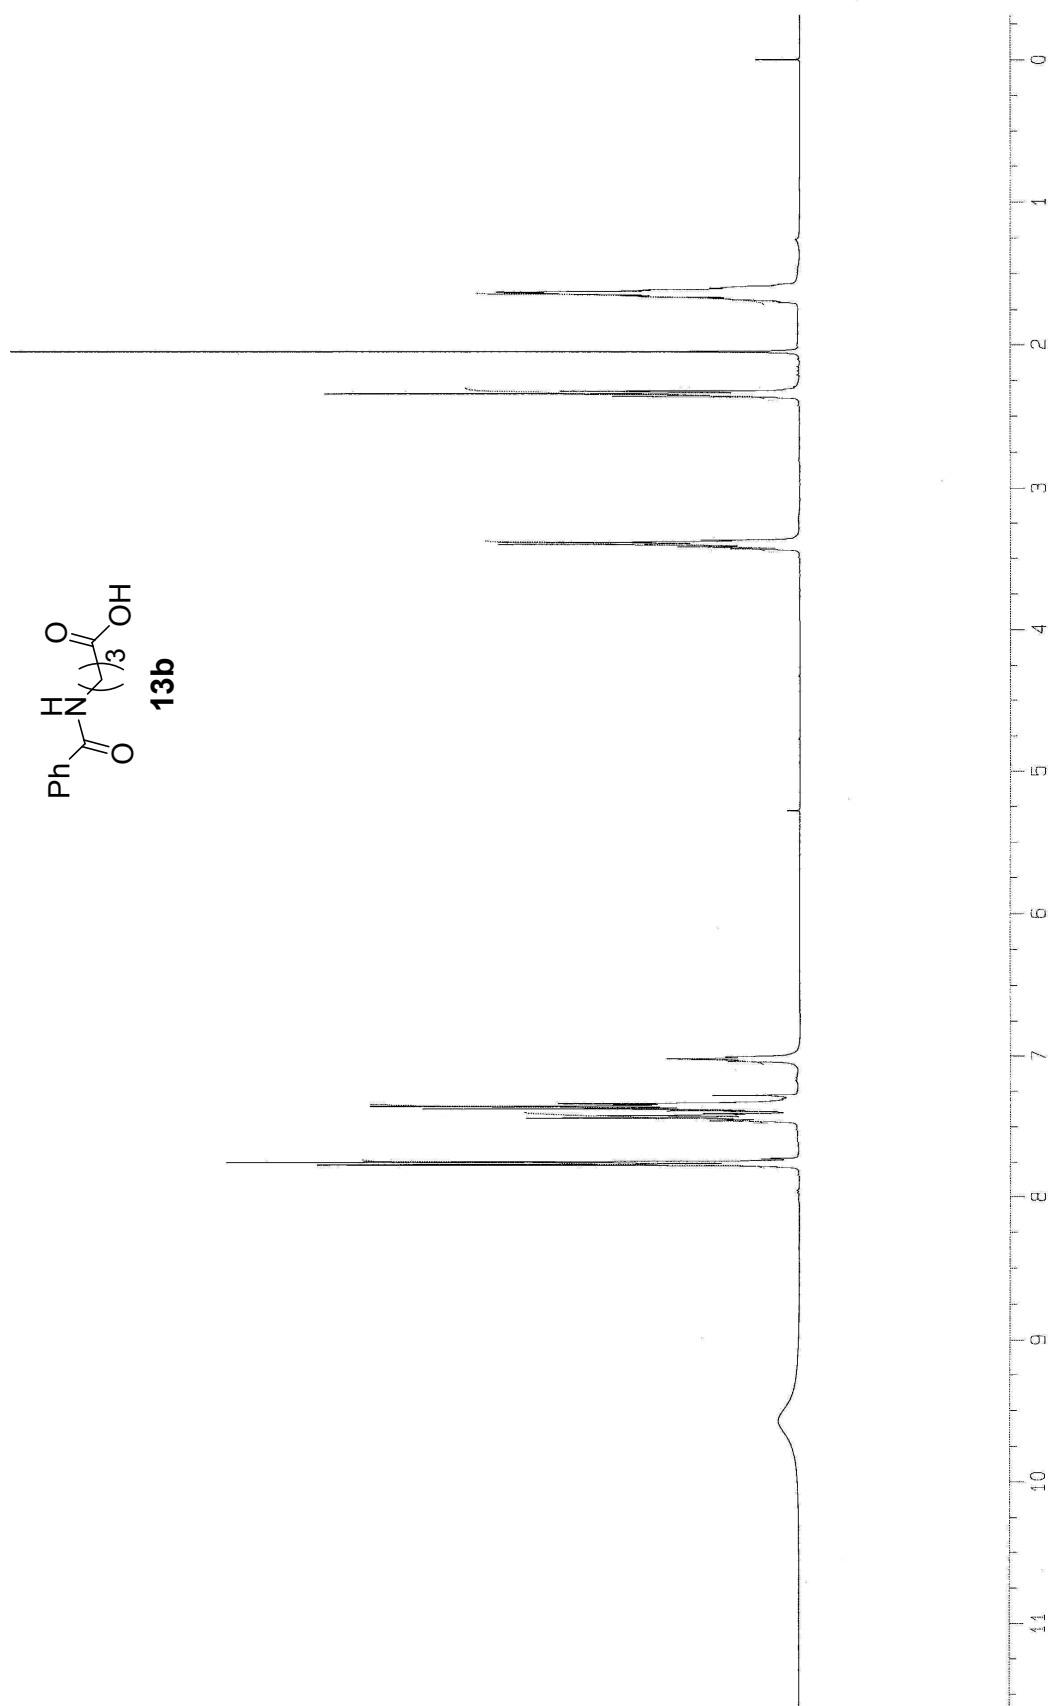

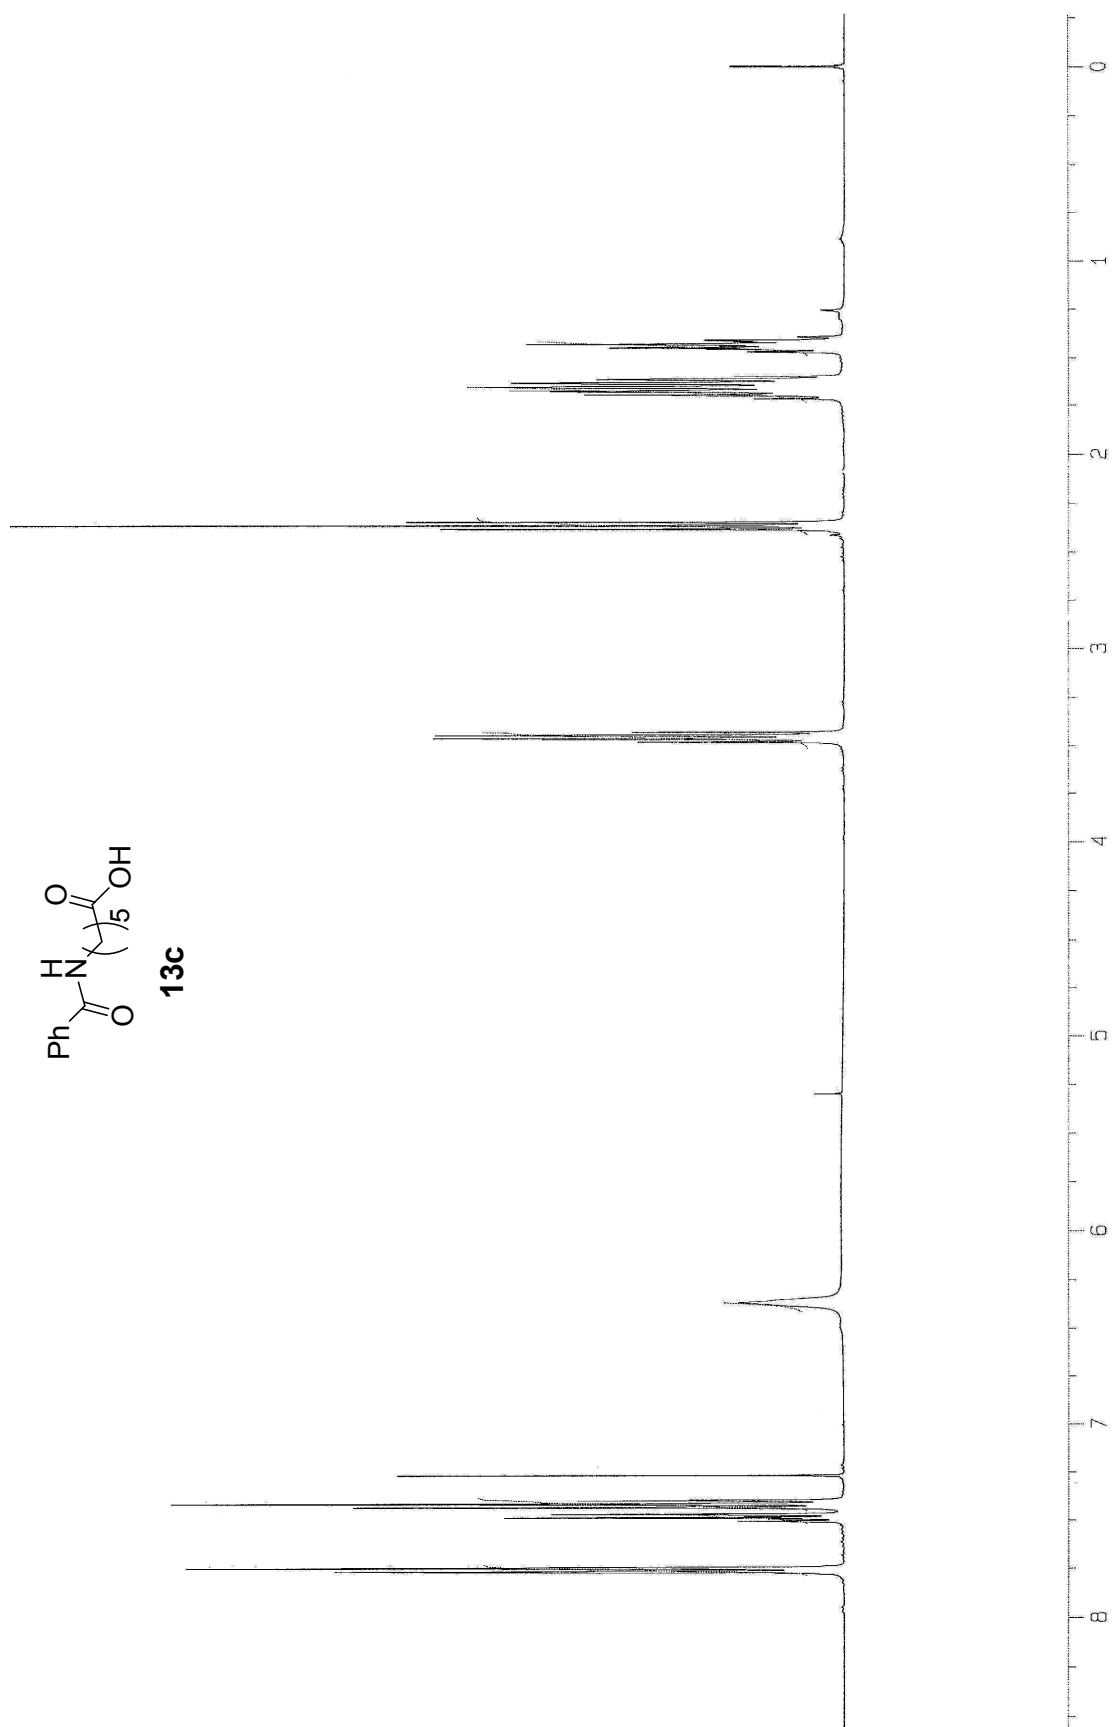



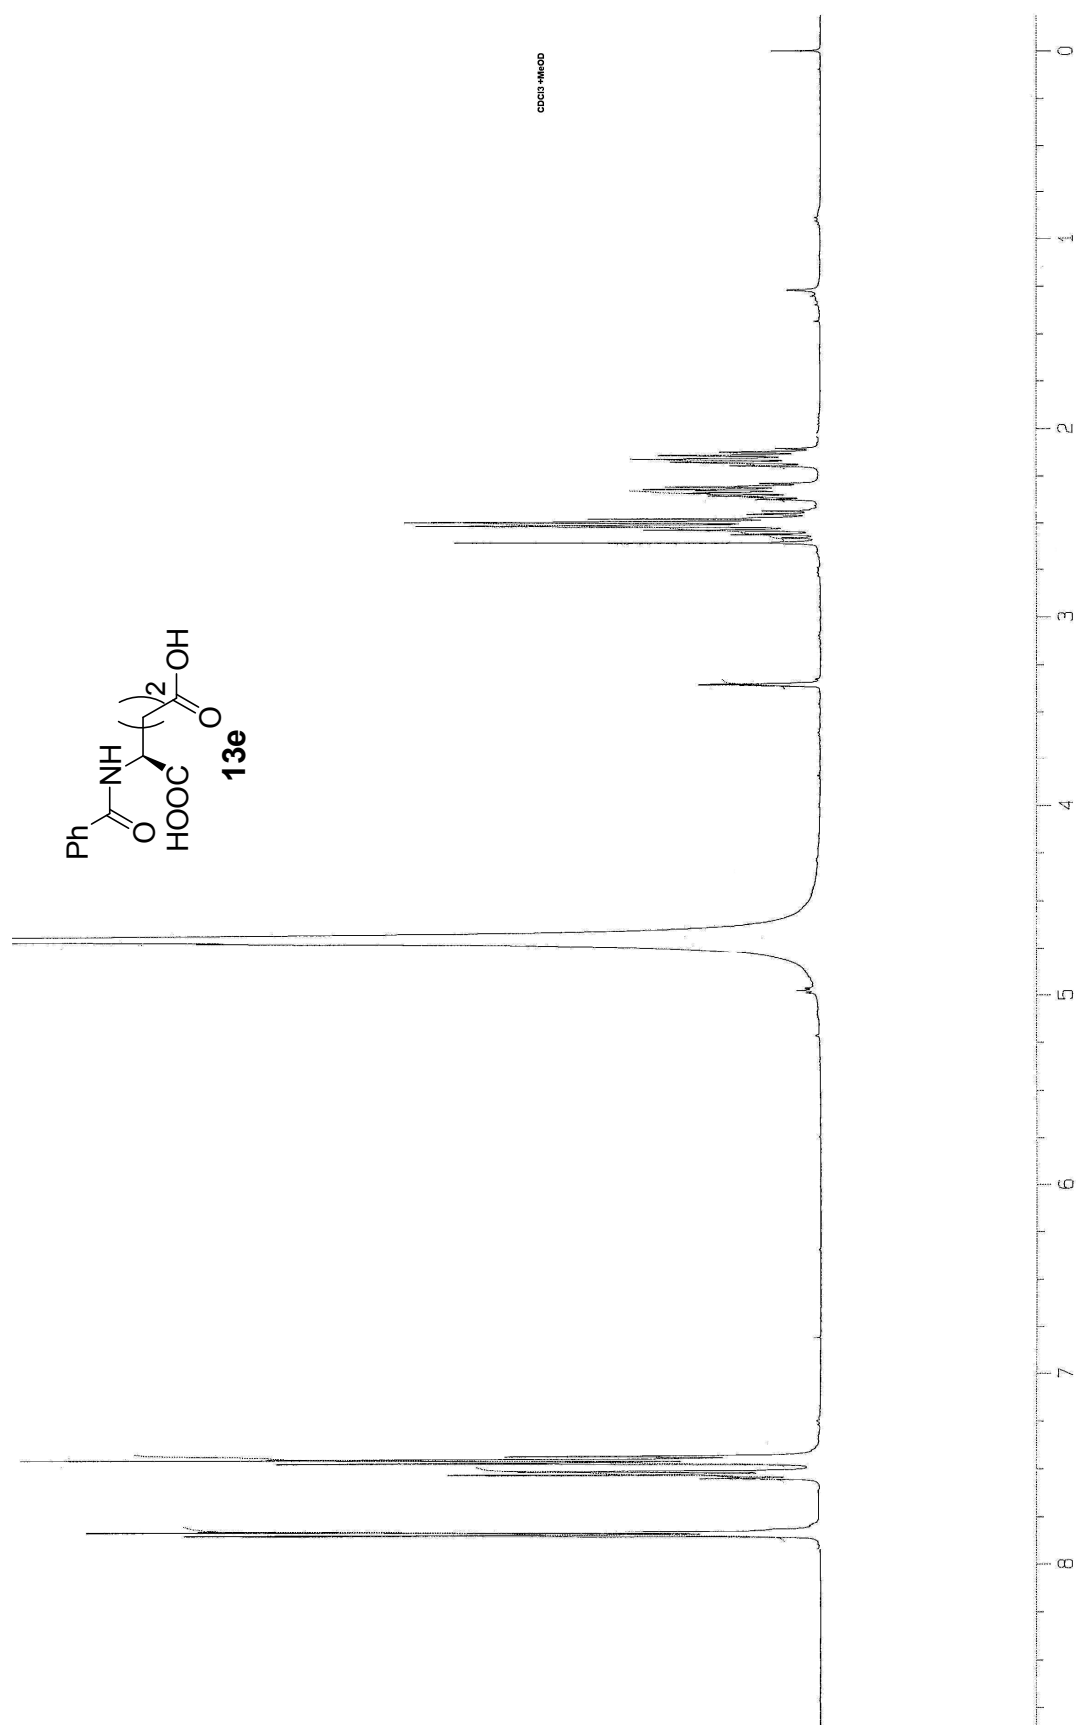



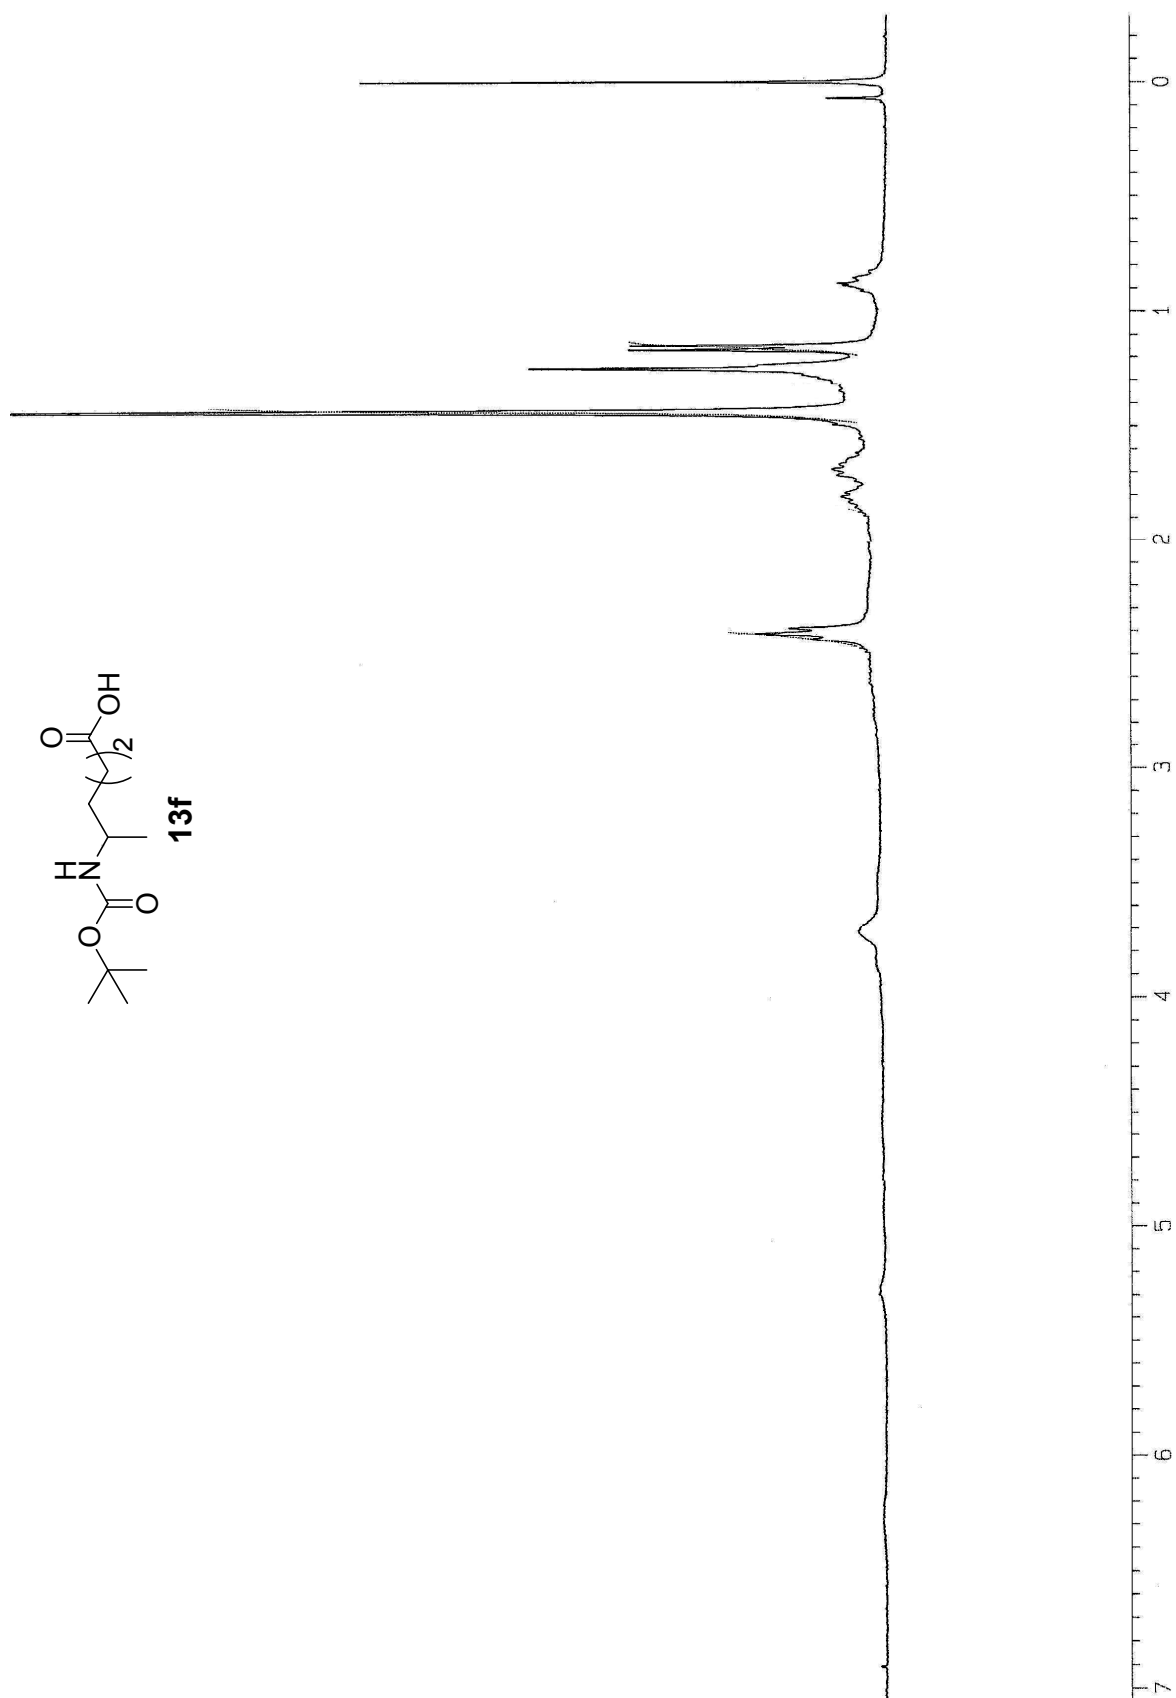

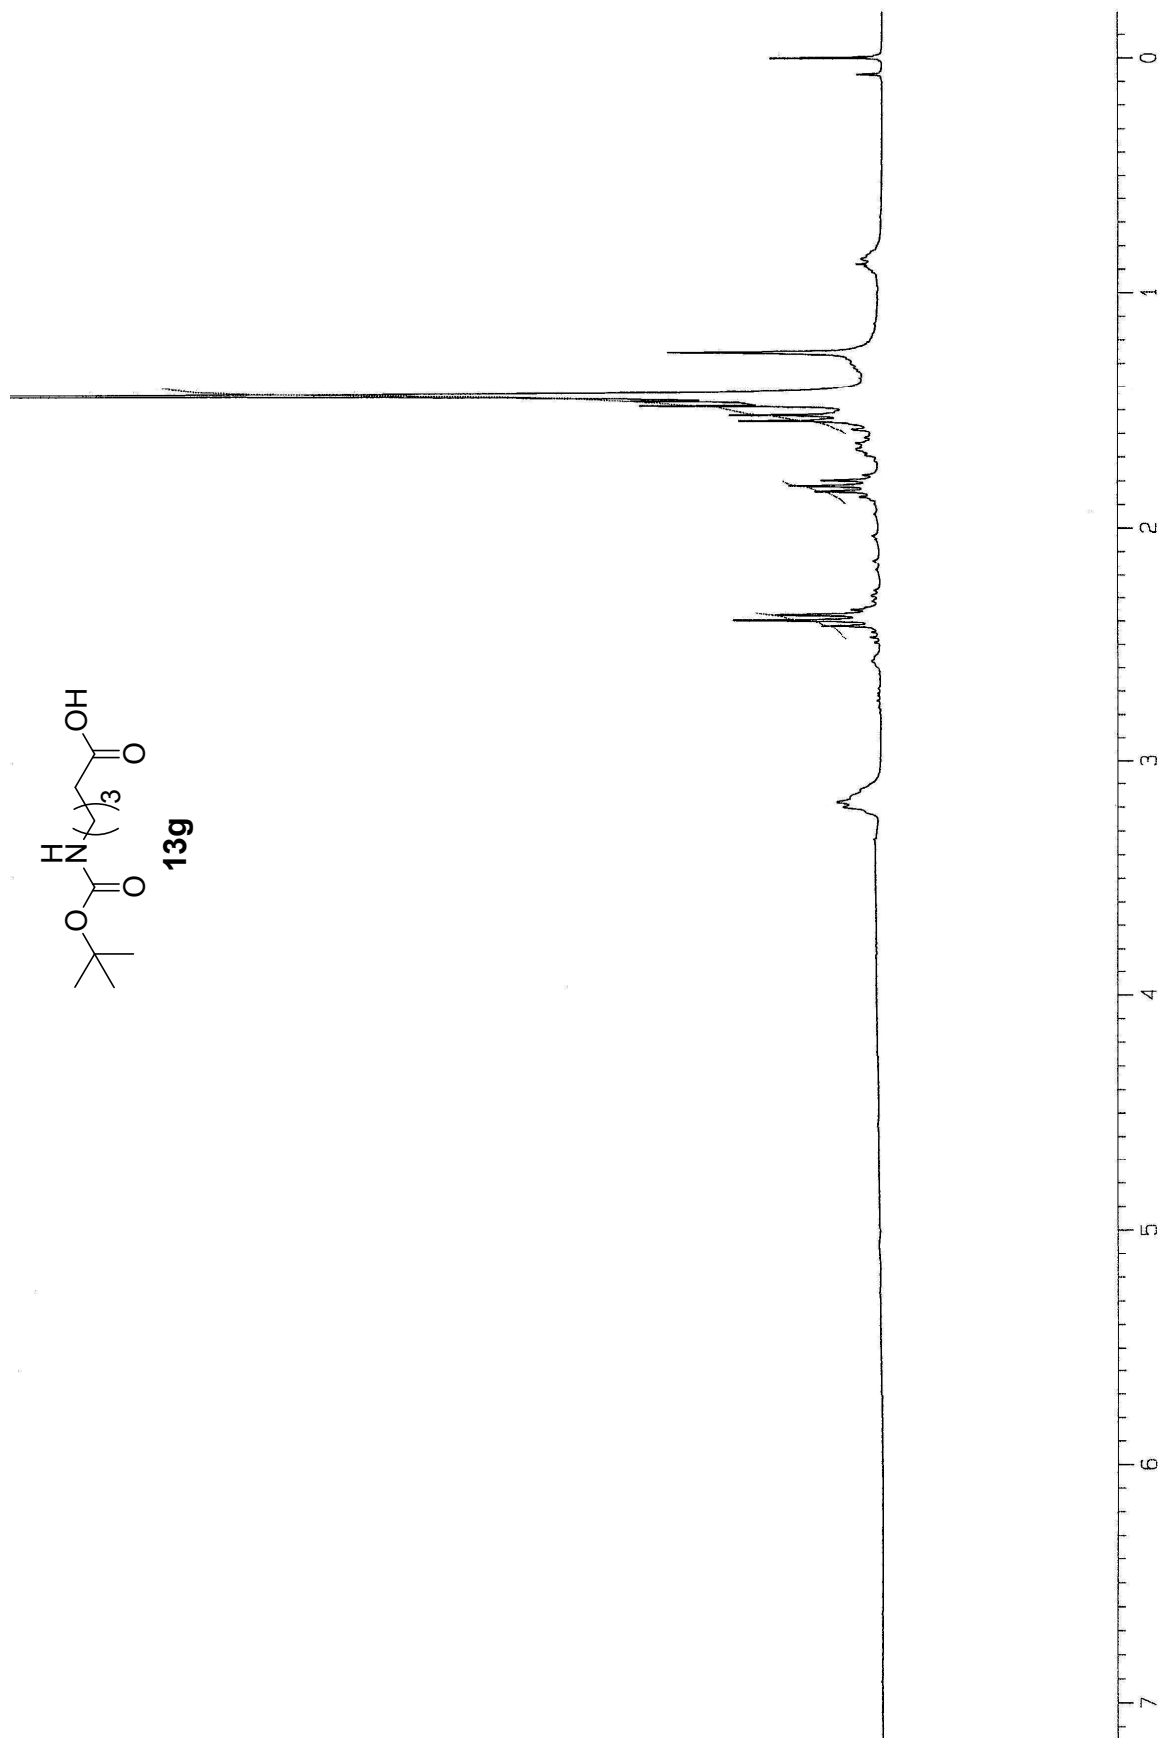

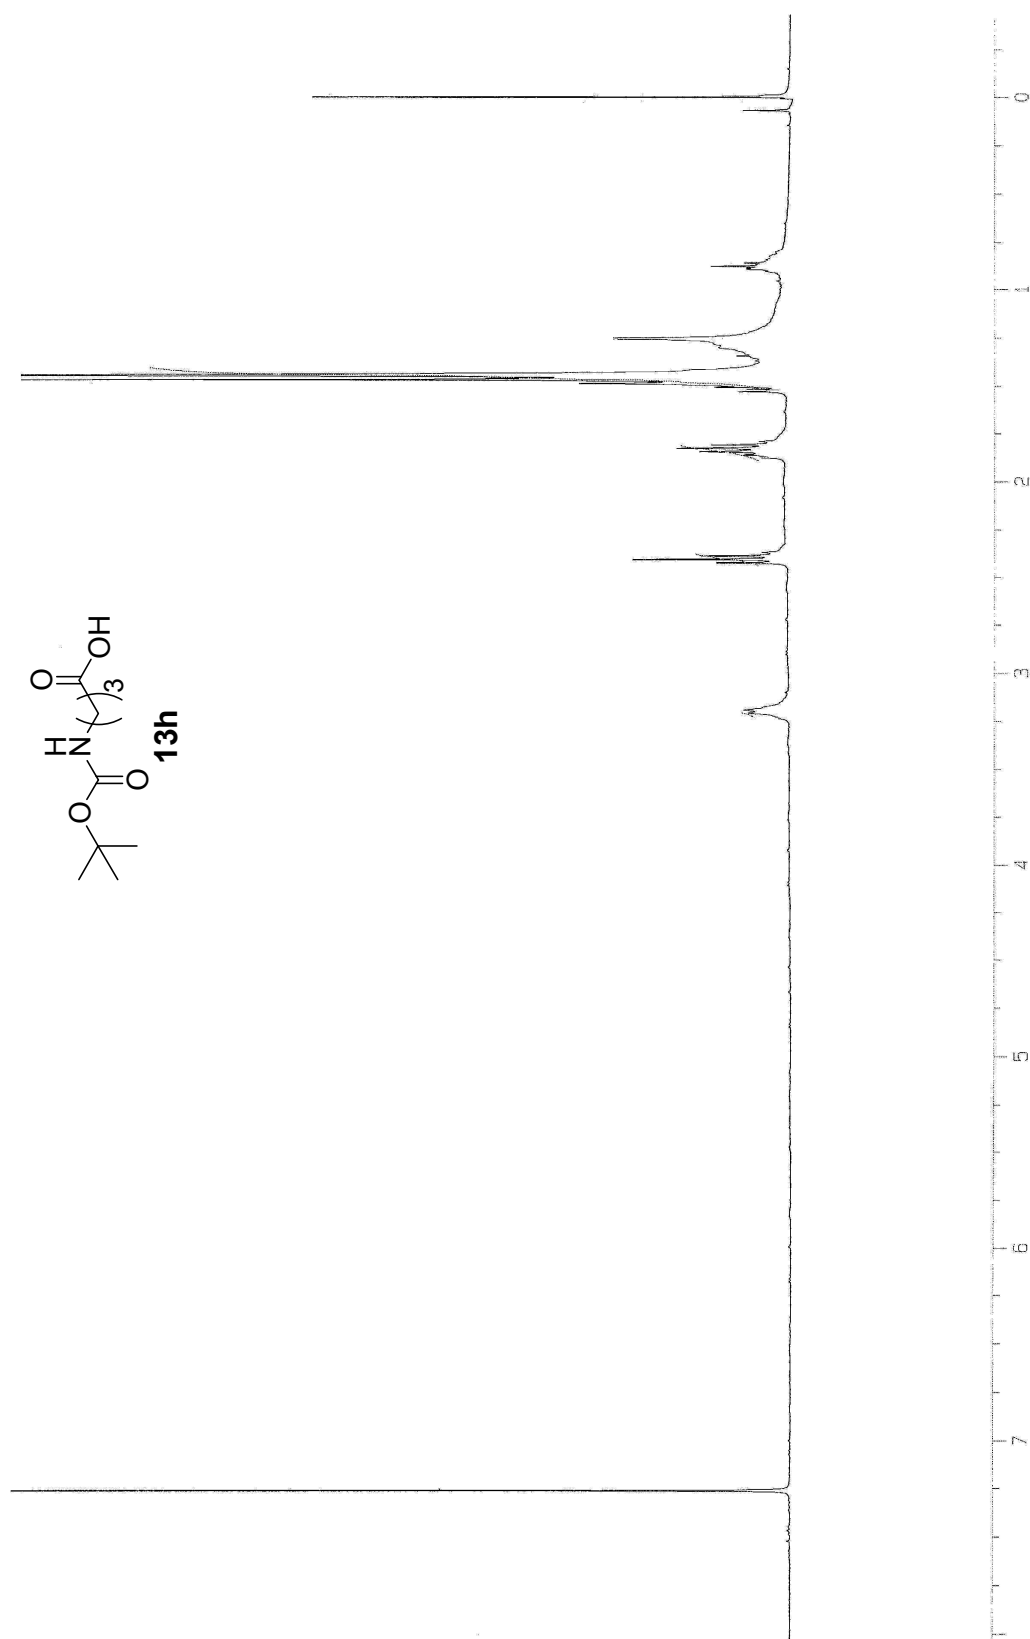

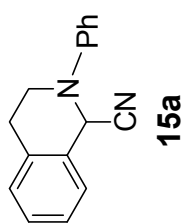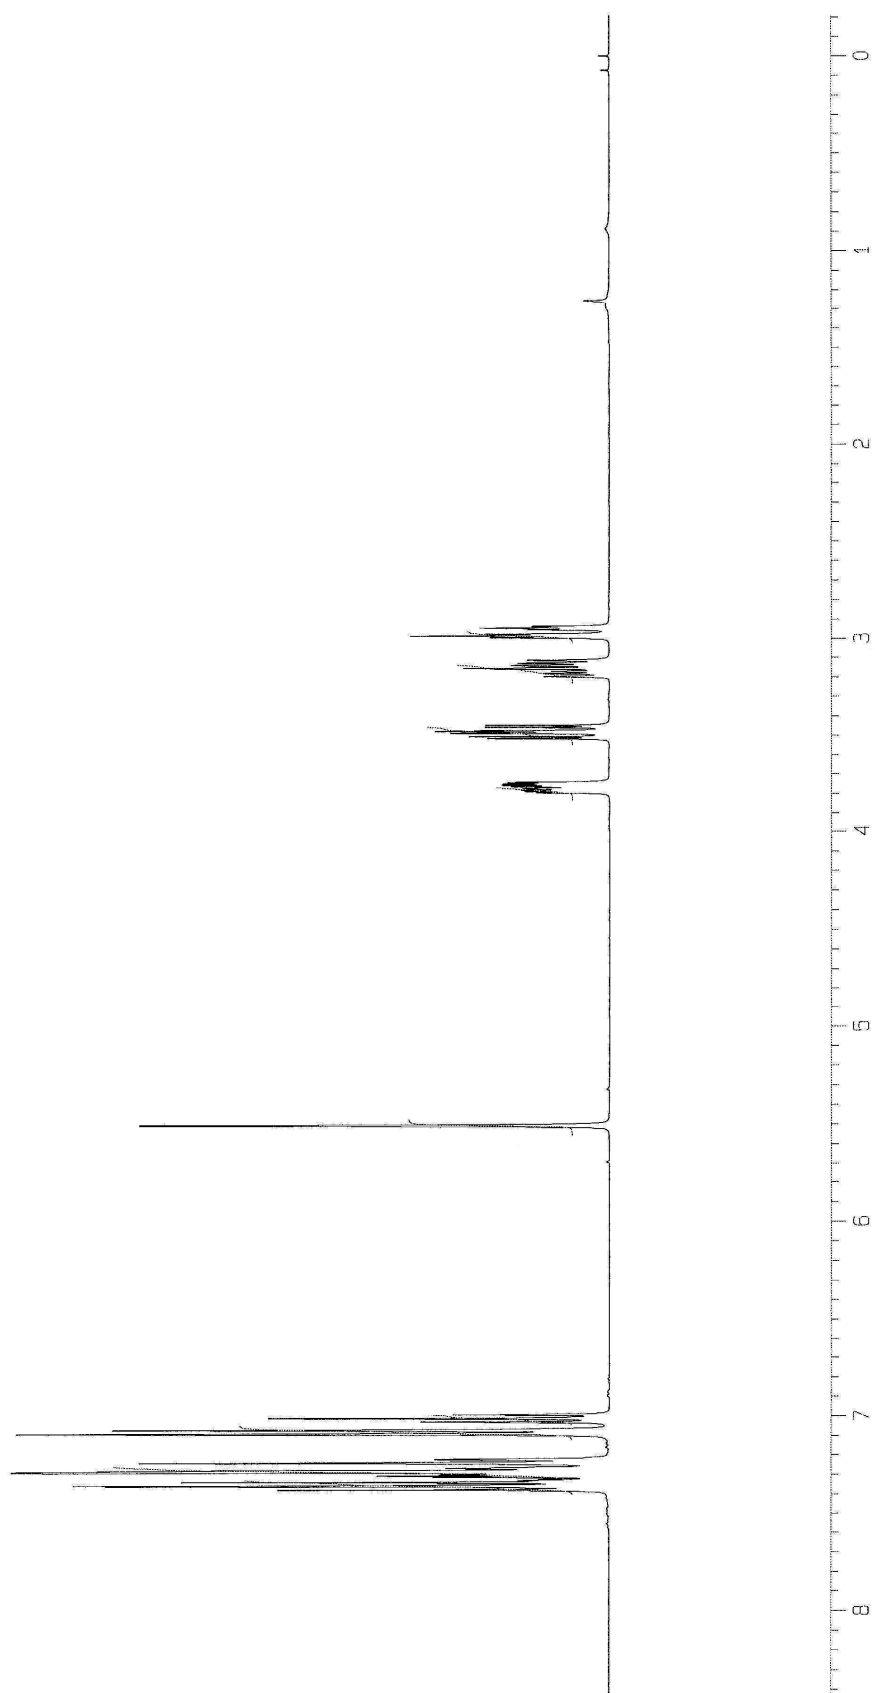

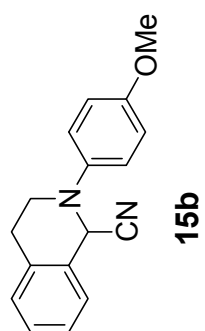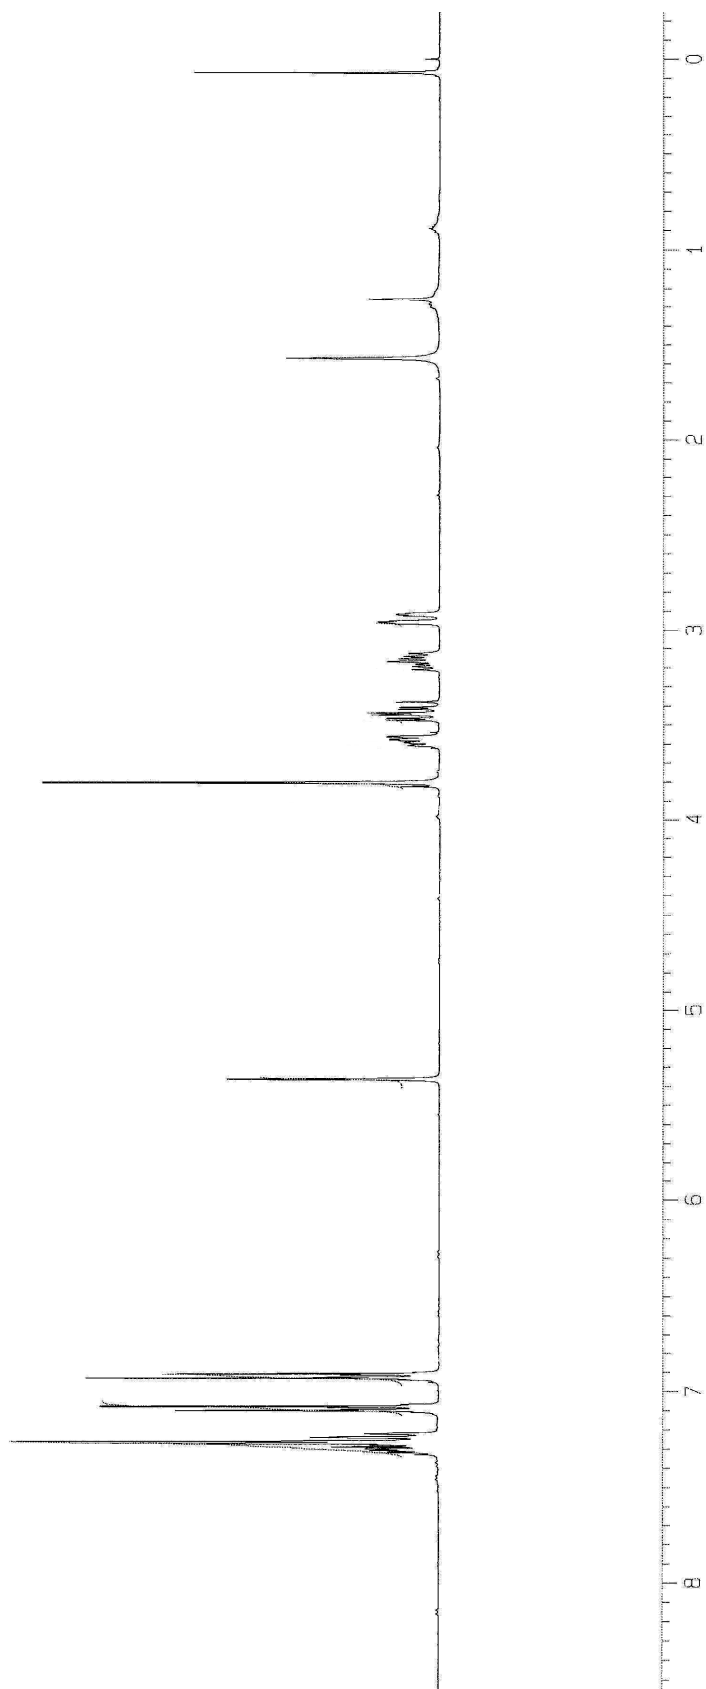

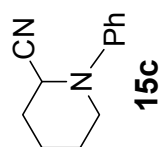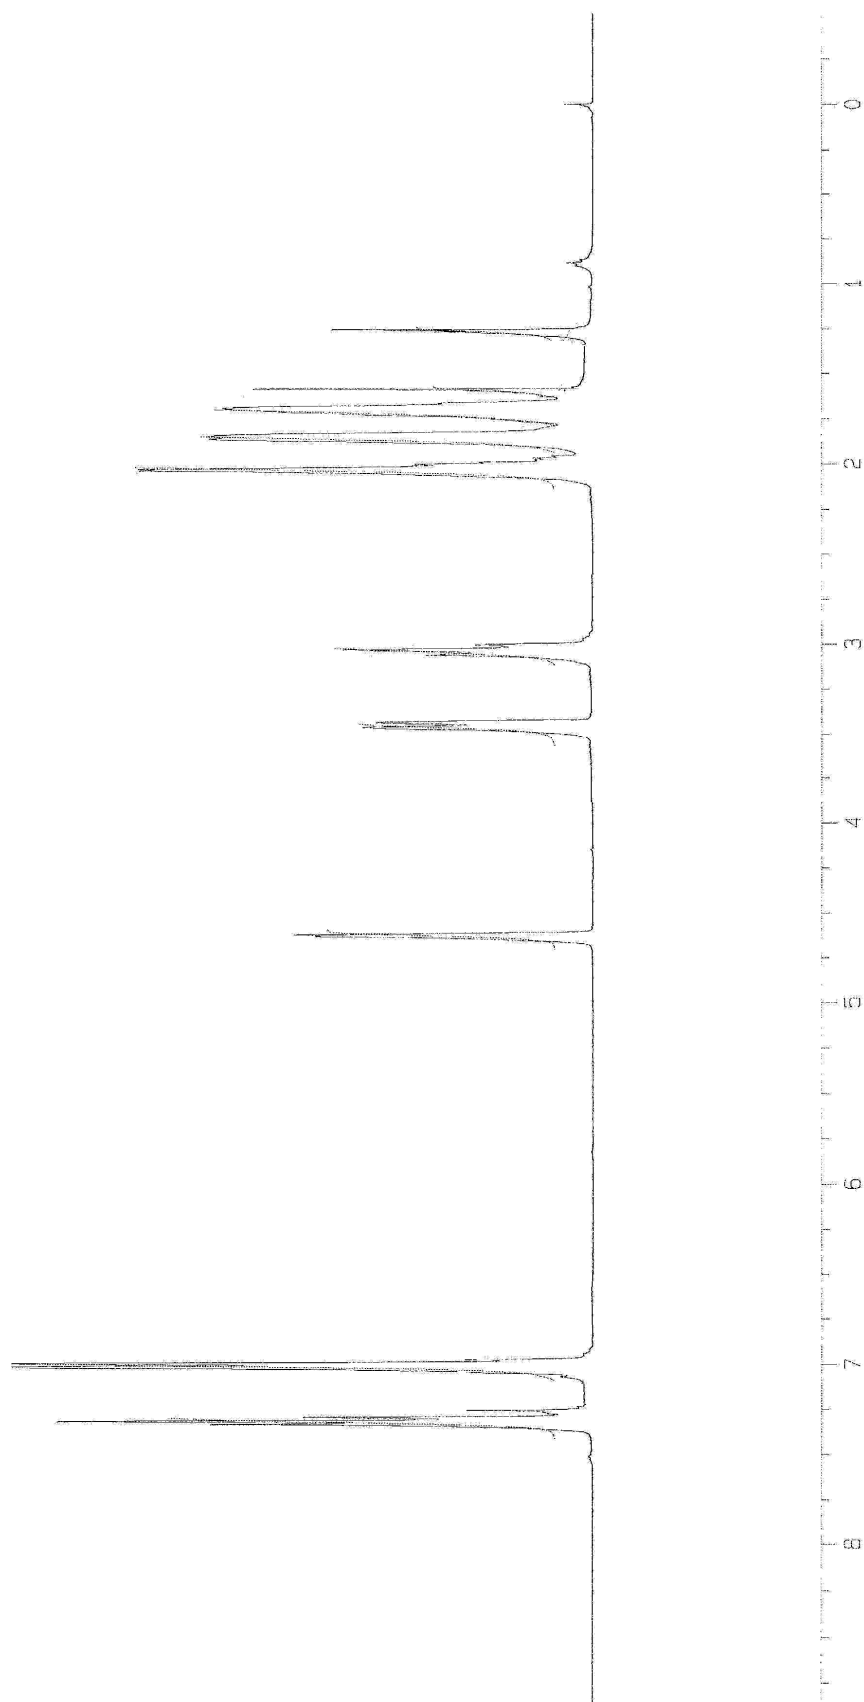

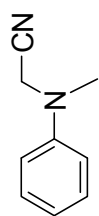

**15d**

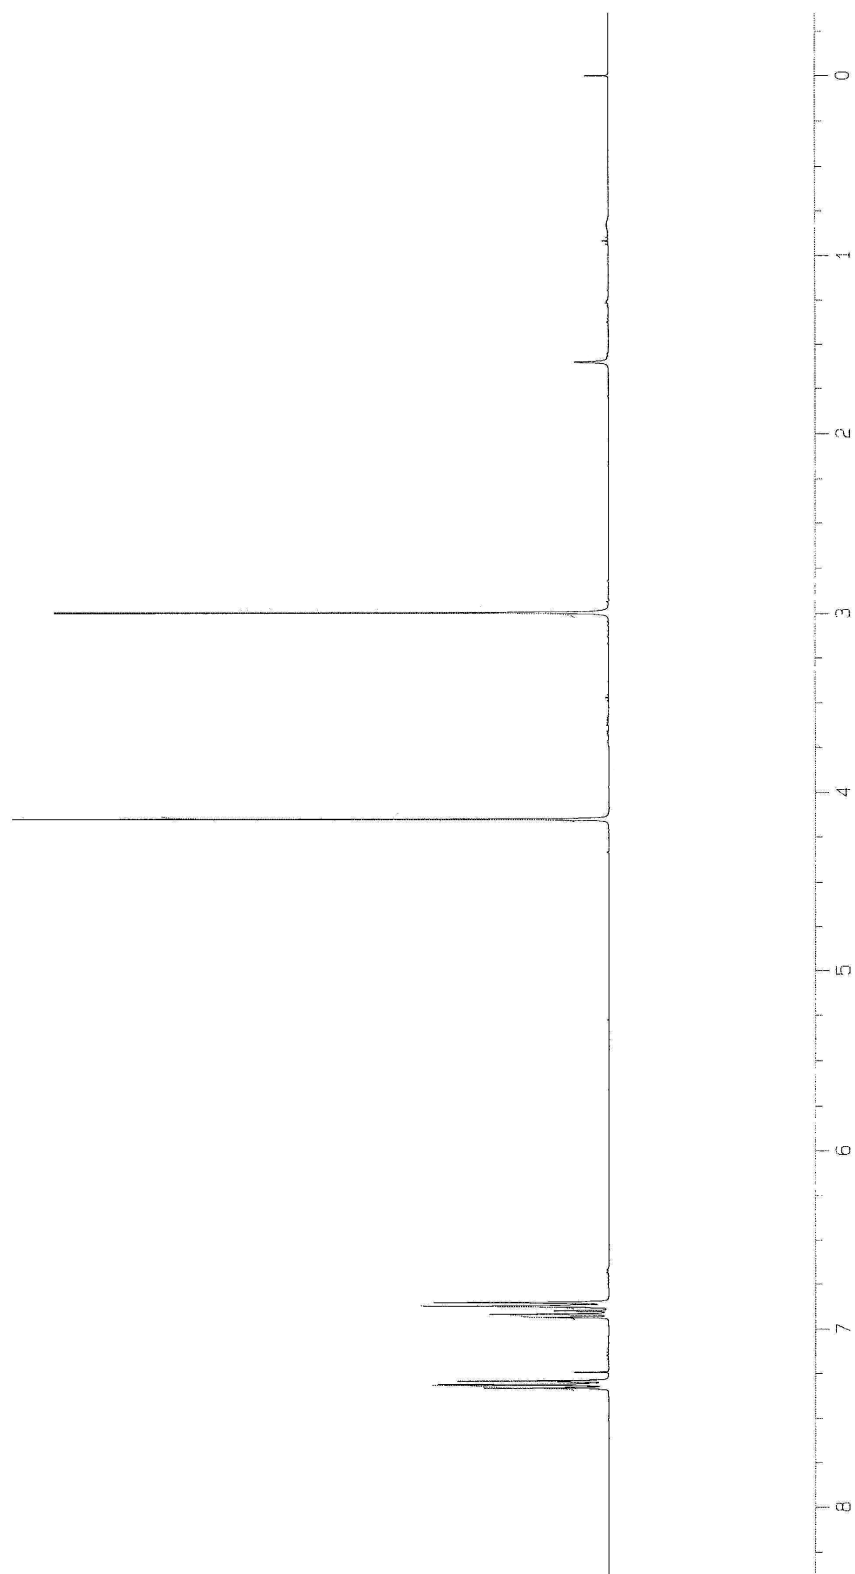

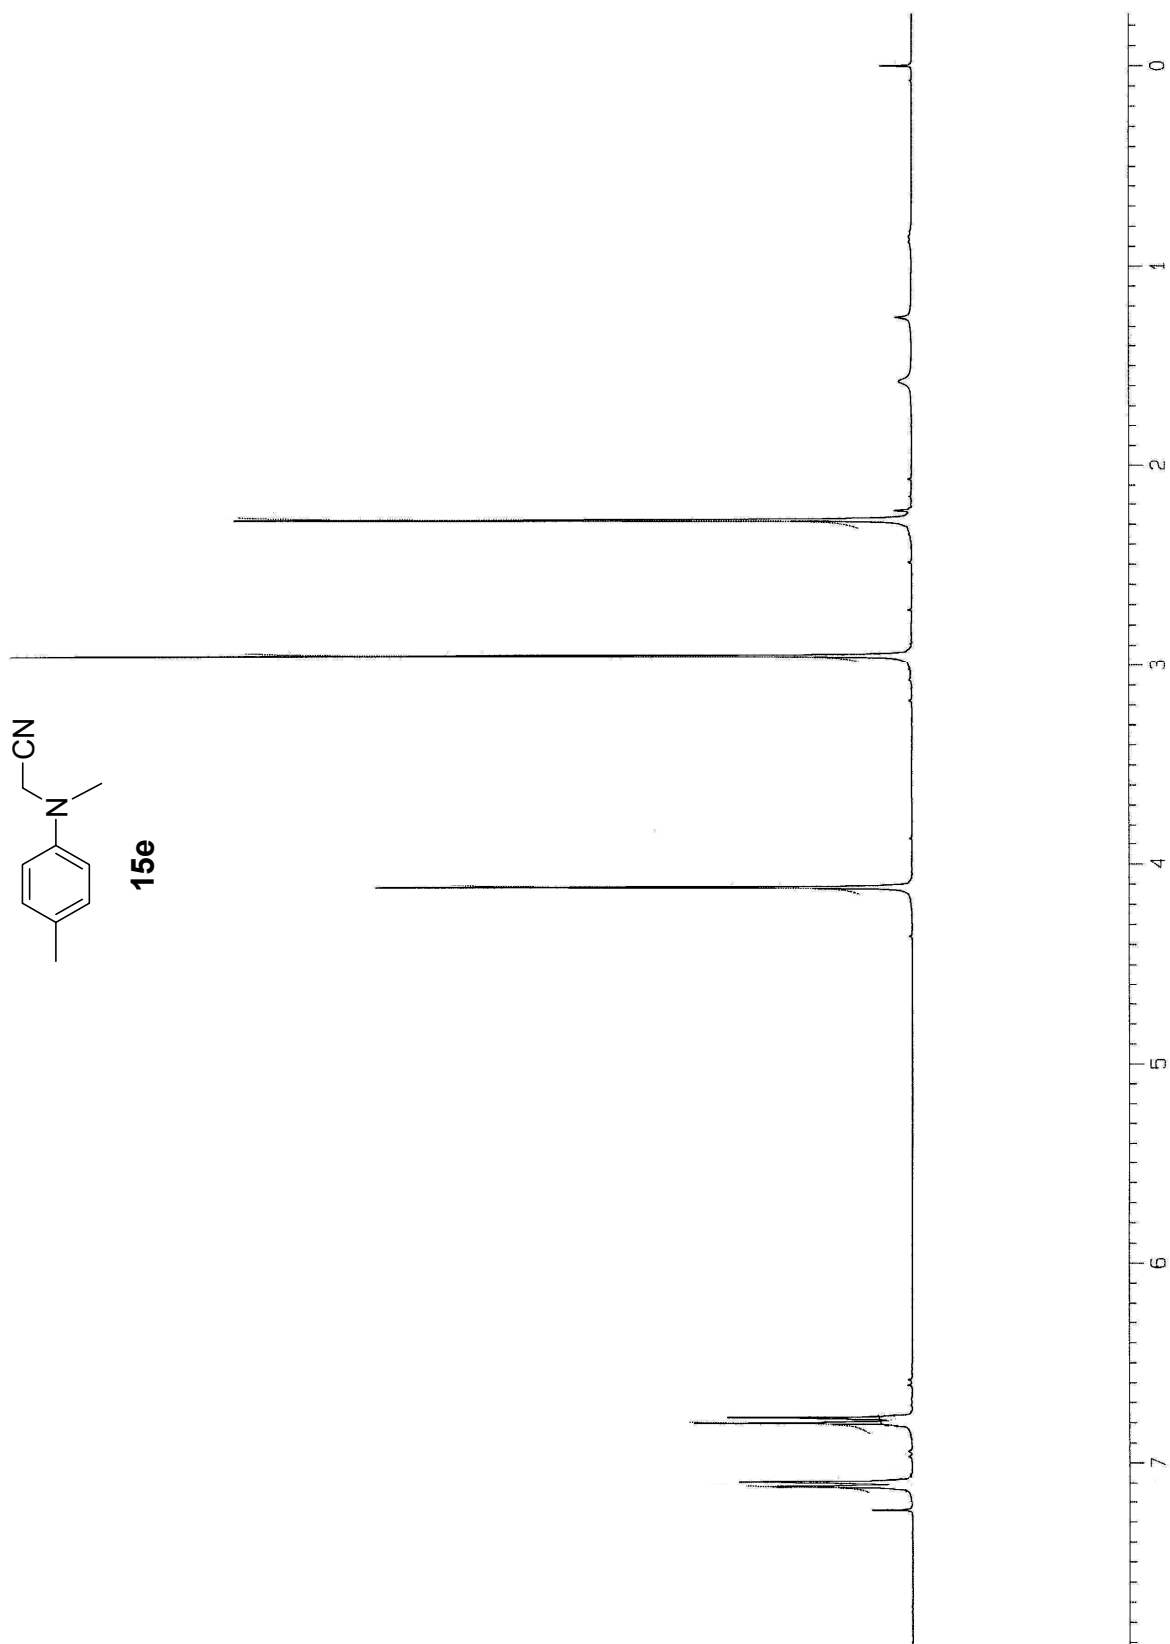



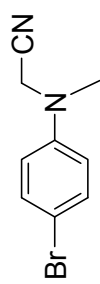

**15f**

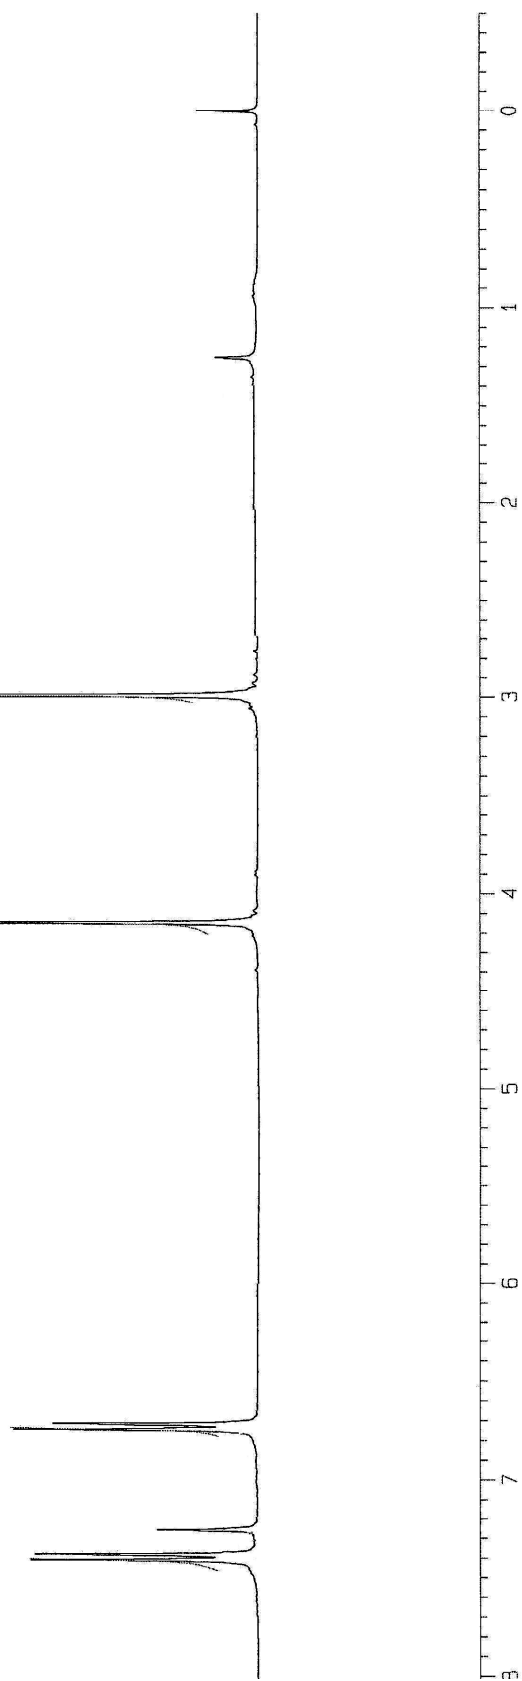

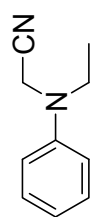

**15g**

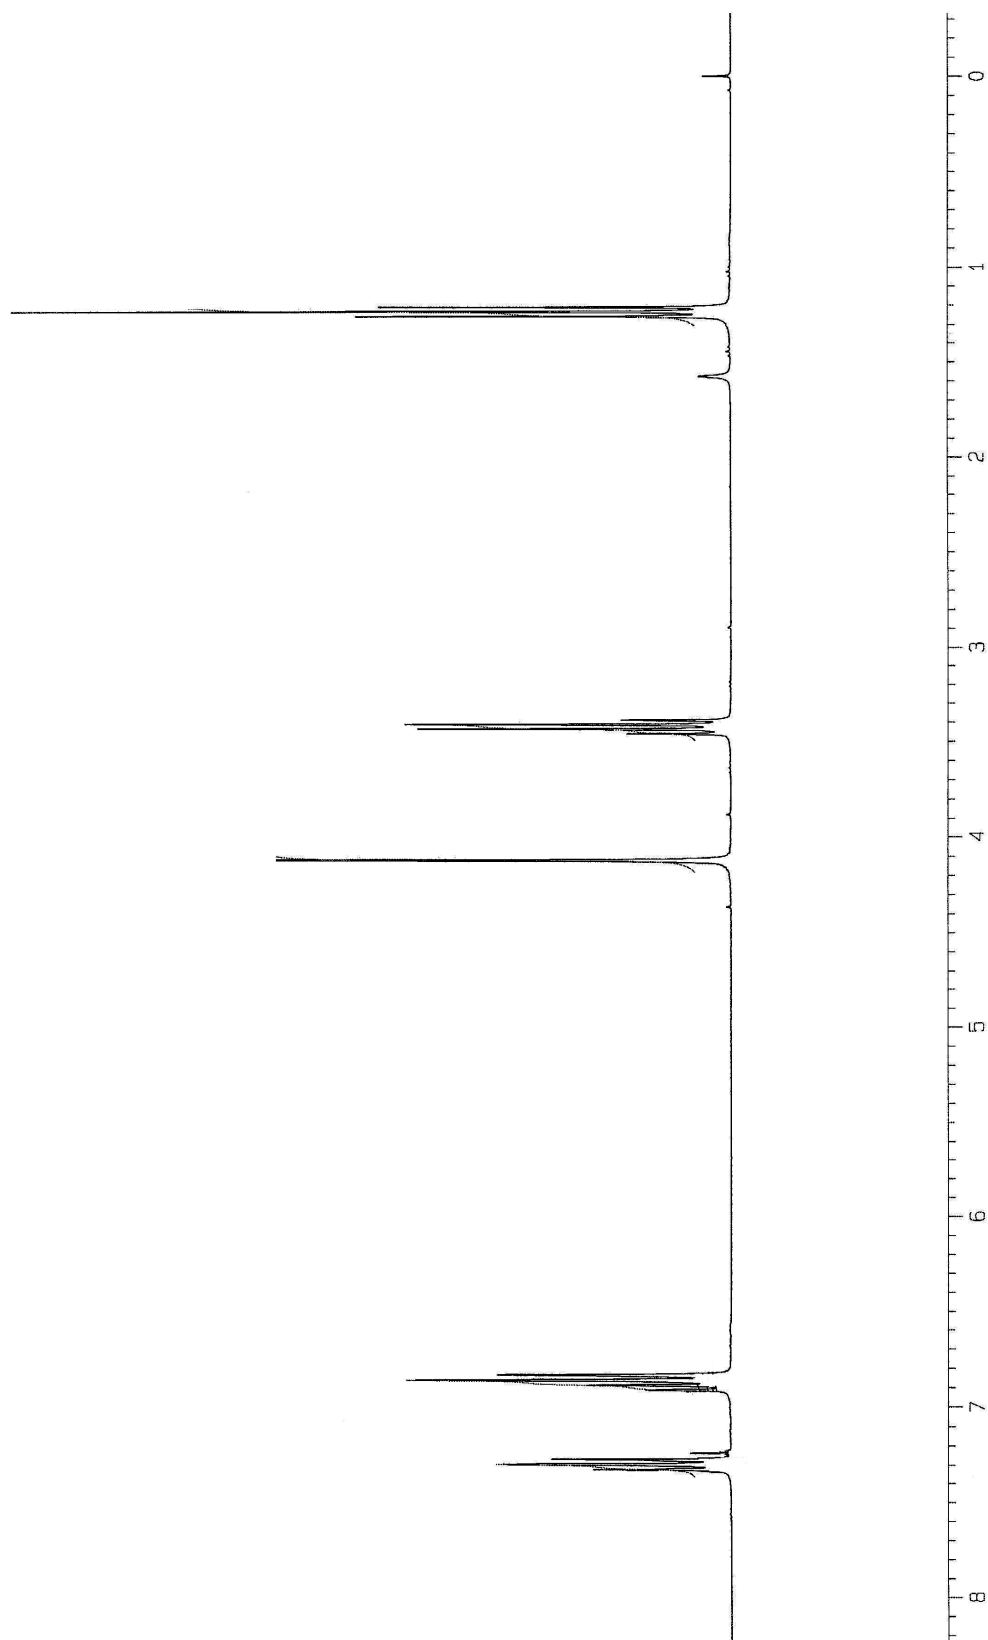

Supplement: c1sc00234a.pdf [file c1sc00234a.pdf]
